1 **Defining and Evaluating Microbial**  
2 **Contributions to Metabolite Variation in**  
3 **Microbiome-Metabolome Association**  
4 **Studies**

5  
6 Cecilia Noecker<sup>1</sup>, Hsuan-Chao Chiu<sup>1,2</sup>, Colin P. McNally<sup>1</sup>, and Elhanan Borenstein<sup>1,3,4,\*</sup>  
7

8 <sup>1</sup> Department of Genome Sciences, University of Washington, Seattle, WA 98195, USA

9 <sup>2</sup> Current affiliation: Office of Chief Technology Officer, MediaTek Inc., Hsinchu City, Taiwan 30078

10 <sup>3</sup> Department of Computer Science and Engineering, University of Washington, Seattle, WA 98195, USA

11 <sup>4</sup> Santa Fe Institute, Santa Fe, NM 87501, USA

12 \* Corresponding Author ([elbo@uw.edu](mailto:elbo@uw.edu))

## 13 **Abstract**

14 Correlation-based analysis of paired microbiome-metabolome datasets is becoming a  
15 widespread research approach, aiming to comprehensively identify microbial drivers of  
16 metabolic variation. To date, however, the limitations of this approach have not been  
17 comprehensively evaluated. To address this challenge, we introduce a mathematical  
18 framework to quantify the contribution of each taxon to metabolite variation based on  
19 uptake and secretion fluxes. We additionally use a multi-species metabolic model to  
20 simulate simplified gut communities, generating idealized microbiome-metabolome  
21 datasets. We then compare observed taxon-metabolite correlations in these datasets to  
22 calculated ground-truth taxonomic contribution values. We find that in simulations of both  
23 a model 10-species community and of complex human gut microbiota, correlation-based  
24 analysis poorly identifies key contributors, with extremely low predictive value despite the  
25 idealized setting. We further demonstrate that the predictive value of correlation analysis  
26 is strongly influenced by both metabolite and taxon properties, as well as exogenous  
27 environmental variation. We finally discuss the practical implications of our findings for  
28 interpreting microbiome-metabolome studies.

29

## 30 **Importance**

31 Identifying the key microbial taxa responsible for metabolic differences between  
32 microbiomes is an important step towards understanding and manipulating microbiome  
33 metabolism. To achieve this goal, researchers commonly conduct microbiome-  
34 metabolome association studies, comprehensively measuring both the composition of  
35 species and the concentration of metabolites across a set of microbial community  
36 samples, and then testing for correlations between microbes and metabolites. Here, we  
37 evaluated the utility of this general approach by first developing a rigorous mathematical  
38 definition of the contribution of each microbial taxon to metabolite variation, and then  
39 examining these contributions in simulated datasets of microbial community metabolism.  
40 We found that standard correlation-based analysis of our simulated microbiome-  
41 metabolome datasets identifies true contributions with very low predictive value, and that  
42 its performance depends strongly on specific properties of both metabolites and  
43 microbes, as well as on the surrounding environment. Combined, our findings can guide  
44 future interpretation and validation of microbiome-metabolome studies.

45

## 46 **Introduction**

47 Microbial communities have a tremendous impact on their surroundings, ranging from the  
48 degradation of environmental toxins (1) to the production of climate change-relevant  
49 metabolites (2). Host-associated communities, in particular, have a substantial impact on  
50 their hosts, and often produce a diverse set of metabolites that interact with numerous  
51 host pathways. In humans, such microbiome-derived metabolites have been identified as  
52 contributing factors to a wide array of diseases including heart disease (3), autism (4),  
53 non-alcoholic fatty liver disease (5), colon cancer (6), inflammatory bowel disease (7),  
54 and susceptibility to infection (8). Characterizing the ways microbial communities  
55 modulate their environments and the relationship between community structure and  
56 metabolic impact is therefore a major, timely, and complex challenge with promising  
57 implications for human health, as well as to environmental stewardship, agriculture, and  
58 industry.

59  
60 When facing this challenge, perhaps the most important task is identifying specific  
61 community members that drive variation in metabolites of interest. Taxa responsible for  
62 observed metabolic differences across communities may be ideal targets for interventions  
63 aiming to modify metabolic phenotypes. Their identification, however, can be a daunting  
64 task. Complex microbial communities are often composed of hundreds or thousands of  
65 poorly characterized species, each with a unique and frequently unknown complement of  
66 metabolic capacities. Even when multiple species are known to possess the potential to  
67 synthesize or degrade a metabolite of interest, the metabolic activity of each species (and  
68 consequently, its contribution to metabolic variation) may be different (9). Moreover,

69 community ecology, interspecies interactions, and nutrient availability (e.g., via diet) can  
70 all regulate and influence the metabolic activity of each species, rendering the link  
71 between community members and metabolic products extremely complex and  
72 challenging to infer (10–12).

73

74 To address this challenge and to identify community members that play an important role  
75 in metabolic variation, a growing number of studies are now comprehensively assaying  
76 multiple facets of community structure across samples, including, most notably,  
77 taxonomic and metabolite compositions (13). For example, to investigate the links  
78 between taxonomic shifts and metabolic phenotypes in the healthy vaginal microbiome  
79 and in bacterial vaginosis, a recent study used a combination of 16S rRNA qPCR,  
80 sequencing, and both global and targeted metabolomics (14). Another study, aiming to  
81 identify taxonomic and metabolic features of resistance and susceptibility to *C. difficile*  
82 infection in the mouse gut similarly applied 16S rRNA sequencing and global  
83 metabolomics (15). In another example, researchers characterized metabolic and  
84 microbial features of periodontitis in the oral microbiome before and after treatment,  
85 combining 16S rRNA sequencing, shotgun metagenomic sequencing, and metabolomics  
86 (16). These are just a few examples of a plethora of recent microbiome-metabolome  
87 studies, investigating the metabolic effects of microbiome variation in the contexts of  
88 chronic and infectious disease, agriculture, precision medicine, nutrition, fermented food  
89 science, and more (17–24). Such multi-omic studies are also a major focus of several  
90 large-scale initiatives to study both host-associated and environmental microbiomes (25,  
91 26).

92

93 Given the taxonomic and metabolomic profiles obtained via such microbiome-  
94 metabolome assays, the vast majority of studies rely on simple univariate correlation-  
95 based analyses to link variation in community ecology to variation in metabolic activity  
96 (11, 14, 15, 27–30). Such analyses specifically aim to identify species whose abundance  
97 across samples is correlated with the concentration of metabolites, often assuming that  
98 highly significant correlations reflect a direct mechanistic link between the taxon and  
99 metabolite in question. These studies further regularly assume that positive correlations  
100 imply synthesis and negative correlations imply degradation, or that targeting the microbe  
101 in question could be used to modulate the concentrations of the metabolites with which it  
102 is correlated. For example, a recent study characterizing the microbiome and metabolome  
103 in Spleen-yang-deficiency syndrome (29) concluded that a positive correlation between  
104 *Bacteroides* and mannose likely resulted from extracellular degradation of mannan into  
105 mannose by that taxon. Similarly, a study of antibiotic perturbations to the microbiome  
106 and metabolome stated that the presence of several weak positive and negative  
107 correlations between genera and arginine supported the conclusion that arginine levels  
108 may be affected by many community members with high functional redundancy (27).

109

110 Yet, to date, the extent to which a correlation-based analysis effectively detects direct  
111 metabolic relationships between taxa and metabolites is unclear. Obviously, a strong  
112 correlation between the abundance of a certain species and the concentration of a  
113 metabolite across samples *could* reflect direct synthesis or degradation of the metabolite  
114 by that species, but could also arise due to environmental effects, precursor availability,

115 selection, random chance, or co-occurrence between species. Similarly, cross-feeding,  
116 external host processes, and varying enzymatic regulation can mask a correlation even  
117 when this species does in fact contribute to observed metabolite variation. Indeed,  
118 previous studies have suggested that microbe-metabolite correlations must have a high  
119 rate of false positives (31), and a recent experimental study pairing microbiome-  
120 metabolome correlation analysis with *in vitro* monoculture validations found anecdotally  
121 that several observed correlations were in fact false positives (32). The limitations of  
122 correlation analysis have also been discussed and well-characterized in other data types  
123 (for example (33, 34)). Importantly, however, the extent of such limitations in the context  
124 of microbiome-metabolome studies, the way they are shaped by microbial community  
125 metabolism, and their impact on data interpretation in this context have not been  
126 systematically evaluated.

127

128 Importantly, two crucial challenges hinder a comprehensive and systematic evaluation of  
129 correlation-based analysis. The first is the lack of a rigorous general definition of a  
130 microbe's contribution to metabolite variability. While establishing the main taxonomic  
131 contributors to metabolite variation may be straightforward for specialized, well-  
132 characterized metabolites that are synthesized by just a single taxon, it can be much less  
133 clear for metabolites that can be synthesized (and/or degraded or modified) by many  
134 different taxa in the community. The second challenge is the absence of ground truth data  
135 on the nature of microbe-metabolite relationships. While limited data on the taxa driving  
136 metabolite shifts can be obtained from comparative mono- and co-culture studies (32, 35,  
137 36), large-scale and comprehensive datasets that link species and metabolite

138 abundances in the context of a complex community, for which the precise impact of each  
139 species on observed metabolite variation is known, are currently not available.

140

141 In this study, we address these two challenges, combining a novel framework for  
142 quantifying microbial contributions with a model-based simulated dataset. Specifically, we  
143 first introduce a generalizable and rigorous mathematical framework for decomposing  
144 observed metabolite variation and quantifying the contribution of each community  
145 member to this variation based on uptake and secretion fluxes. Second, we use a  
146 dynamic multi-species genome-scale metabolic model to simulate the metabolism of  
147 microbial communities of varying complexity and to generate idealized datasets of paired  
148 taxonomic and metabolomic abundances, with complete information on metabolite fluxes,  
149 microbial growth, interspecies interactions, and environmental influences. Applying our  
150 mathematical framework to these simulated datasets, we could then compare calculated  
151 contribution values to observed taxon-metabolite correlations and evaluate the ability of  
152 correlation-based analyses to identify key microbial contributors. We were additionally  
153 able to investigate factors that shape the relationship between community composition  
154 and metabolism in depth and to identify specific properties and mechanisms that impact  
155 the performance of microbiome-metabolome correlation studies.

156

157 Notably, given the objectives of this study, we intentionally focus on characterizing  
158 microbiome-metabolome relationship in a model-based, tractable, and well-defined  
159 setting. Indeed, our metabolic model may not perfectly capture all the complex and  
160 diverse mechanisms that are at play in host-associated communities; however,



161 considering the scope of this study, accurately modeling the metabolism of a specific  
162 community may not be crucial. Rather, for our analysis, we want our simulated data to  
163 recapitulate broad trends observed in naturally occurring microbial ecosystems, as indeed  
164 has been observed in similar models (37–41). Moreover, utilizing this model-based  
165 approach allows us to dissect the relationship between community composition and  
166 metabolic phenotypes without the complexities inherent to *in vivo* communities (including  
167 spatial heterogeneity, measurement error, inter-microbial signaling, or strain-level  
168 variation), and with variation in the concentrations of environmental metabolites resulting  
169 exclusively from microbial metabolic activity. Analyzing the ability of a correlation-based  
170 analysis to detect true microbial drivers of metabolite variation in these simplified, best-  
171 case settings provides a baseline for the expected performances of such analyses in real  
172 microbiome-metabolome studies.  
173

## 174 **Results**

### 175 ***Quantifying the impact of individual microbial species on variation in metabolite*** 176 ***concentrations***

177 In this study, we consider a microbial community as an idealized system, consisting of a  
178 population of multiple microbial species in a shared, well-mixed, biochemical  
179 environment. Each species uptakes necessary metabolites from the shared environment,  
180 performs a variety of metabolic processes to promote its growth, and secretes certain  
181 metabolites back into the shared environment. We additionally assume that certain  
182 nutrients flow into the environment and that microbial cells and metabolites are diluted  
183 over time. These processes can represent, for example, the inflow of dietary nutrients  
184 and the transit through the gut in the context of the gut microbiome. For simplicity, we  
185 primarily consider a constant inflow and dilution rate, as in a chemostat setting.  
186 Accordingly, a microbiome-metabolome study can be conceived as analyzing a set of  
187 several such communities (at a certain point in time), each with a different composition of  
188 microbial species and correspondingly variable environmental metabolite concentrations.  
189 We focus initially on a controlled setting with identical nutrient inflow across all  
190 microbiomes, but later examine the impacts of differences in nutrient inflow between  
191 communities.

192  
193 Given this setting, we first sought to establish a rigorous and quantitative framework for  
194 defining the impact of each microbial species (or any taxonomic grouping) in the  
195 community on the variation observed in the concentration of a given metabolite across  
196 community samples. We focused on species that *directly* modulate the environmental

197 concentration of a given metabolite via synthesis or degradation, ignoring indirect effects  
198 via, for example, the synthesis of a precursor substrate that could impact the metabolic  
199 activity of other species. We noted that the total concentration of a metabolite in the  
200 environment can be represented as the sum of cumulative synthesis or degradation fluxes  
201 of this metabolite by each of the  $n$  species in the community, as well as cumulative  
202 environmental fluxes (e.g., total nutrient inflow and dilution). Formally, the metabolite  
203 concentration,  $M$ , can therefore be expressed as a sum of  $n$  dependent random variables  
204  $m_i$ , where each  $m_i$  denotes the overall synthesis or degradation of the metabolite by each  
205 species, along with an additional random variable  $m_{env}$ , denoting the overall impact of  
206 environmental processes.

207

208

$$M = \sum_{i=1}^n m_i + m_{env}$$

209

210 As discussed above, when analyzing microbiome-metabolome datasets, the goal is often  
211 to identify taxa responsible for *changes* in the concentration of a metabolite of interest  
212 across a set of samples. Accordingly, here we wish to quantify the *contribution* of each  
213 species to the *variance* in the concentration of that metabolite across samples.  
214 Specifically, in the formulation  
215 above,  $var(M)$  depends on the variance in the constituent microbial and environmental  
216 factors, as well as the covariance between these components. This variance can then be  
217 linearly separated into  $n+1$  terms, representing the contribution of each species (denoted  
218  $c_i$ ), and of any  
219 environmental nutrient fluxes (denoted  $c_{env}$ ) to the total variation in the metabolite:

220

221 
$$\text{var}(M) = \sum_{i=1}^n c_i + c_{env}; c_i = \text{var}(m_i) + \sum_{j \neq i} \text{cov}(m_i, m_j) + \text{cov}(m_i, m_{env})$$

222

223 If the nutrient inflow is constant across samples, its effect can be ignored and its  
224 contribution to the variance  $c_{env}$  is 0. Additionally, in a chemostat setting, the dilution of  
225 each metabolite can be accounted for in the calculation of each contribution, as it depends  
226 strictly on the dilution rate and on previous metabolite concentrations (Methods). Finally,  
227 in order to compare species contributions across metabolites and to represents the  
228 relative share of the total variance of a given metabolite that is attributable to species  $i$ ,  
229 we defined the *relative* contribution to variance  $\hat{c}_i$  of each species  $i$  to metabolite  $M$  by  
230 normalizing contribution values by the metabolite's total variance:

232 
$$\hat{c}_i = \frac{c_i}{\text{var}(M)}$$

231

233 This framework for calculating microbial contribution values provides a systematic  
234 measure of the causal impact of each taxon on observed variation in the environmental  
235 concentration of each metabolite, distilling the effect of complex ecological and metabolic  
236 interactions to a concise and interpretable set of quantities. Moreover, the obtained  
237 contribution profile is a linear decomposition of observed metabolic variation, wherein the  
238 sum of contributions of all species equals the observed variation in the metabolite.  
239 Notably, when a species' activity has large negative covariances with the activities of  
240 other community members, contribution values can be negative. Such negative  
241 contribution values indicate that a species' secretion or uptake of that metabolite varies

242 in a way that mitigates the activity of others. Correspondingly, contribution values can be  
243 greater than 1, reflecting scenarios in which a species in fact generates more variation of  
244 this metabolite than is ultimately observed, but that its impact is mitigated by other  
245 species.

246  
247 It is also worth noting that our analytical decomposition of contributions to variance is  
248 mathematically equivalent to calculating the Shapley values for the variance in metabolite  
249 concentrations (see Methods and Figure S1). Shapley value analysis is a game theory  
250 technique that defines an individual's contribution to a collective outcome, and has been  
251 shown to be the only general definition that is efficient, linear, symmetric, and assigns  
252 zero values to null contributors (42). A similar, Shapley value-based approach was  
253 recently applied to address the related problem of identifying the primary taxonomic  
254 contributors to differential functional abundances in metagenomic data (43).

255  
256 ***A multi-species metabolic model for generating complex microbiome-***  
257 ***metabolome data***

258 We next set out to generate a large-scale dataset of microbiome-metabolome profiles  
259 with complete information about metabolite uptake and secretion fluxes. To this end, we  
260 used a multi-species metabolic model to simulate the growth, dynamics, metabolism, and  
261 environment of a simple microbial community. This model is based on a previously  
262 introduced genome-scale framework for modeling the metabolism of multi-species  
263 communities and for tracking the metabolic activity of each community member over time  
264 (44, 45). Briefly, this framework assumes that each species optimizes its growth selfishly

265 given available nutrients in the shared environment and predicts the metabolic activity for  
266 each species in short time increments using Flux Balance Analysis (46). After each  
267 increment, the model uses the predicted metabolic activities of the various species to  
268 update the biomass of each species and the concentration of metabolites in the shared  
269 environment (hence, potentially impacting the growth and metabolism of other species in  
270 subsequent time steps). Importantly, this model allows for the natural emergence of  
271 metabolic competition and exchange between species, as well as selection for taxa with  
272 the most efficient growth rate in a given nutrient environment. Full details of this model  
273 and simulation parameters can be found in the Methods.

274

275 We specifically modeled a simplified gut community that was previously explored  
276 experimentally (47). This community includes 10 representative gut species, spanning  
277 the major clades found in the human gut and collectively encoding the key metabolic  
278 processes taking place in this environment, including breakdown of complex dietary  
279 polysaccharides, amino acid fermentation, and removal of fermentation end products via  
280 sulfate reduction and acetogenesis. Genome-scale metabolic models of these 10 species  
281 were obtained from the AGORA collection (40) – a recently introduced set of high-quality  
282 gut-specific metabolic models. To mimic the experimental gnotobiotic mouse setting (47),  
283 we simulate growth in a chemostat, with a nutrient inflow mimicking the content of a  
284 standard corn-based mouse chow, and a dilution rate consistent with mouse transit time  
285 and gut volume. While maintaining this nutritional environment, we systematically  
286 explored the landscape of possible community compositions, varying the initial relative  
287 abundance of each species from 10% to 60% (with a consistent total abundance equal to

288 the community carrying capacity), resulting in a total of 61 different community  
289 compositions. For the analysis below, we simulated growth for 144 hours (as 576 15-  
290 minute time steps). For most community compositions considered, this simulation time  
291 consisted of an initial stabilization period followed by a transition to a near-steady-state  
292 equilibrium with little change in community composition (Figure 1A). Notably, across the  
293 various simulations, some species maintained high abundances throughout the course of  
294 the simulation, while others reverted to lower levels.

295  
296 Throughout the course of each simulation, we recorded the abundances of each species,  
297 the secretion and uptake rate of each metabolite by each species (as well as internal  
298 reaction fluxes), and the concentration of each metabolite in the environment (Figure 1A-  
299 B), thereby obtaining a comprehensive dataset describing species composition,  
300 metabolic activities, and metabolite concentrations across 61 different communities. To  
301 mirror the typical structure of a microbiome-metabolome cross-sectional dataset, we  
302 specifically considered the abundances of species and the concentrations of metabolites  
303 in the environment at the end of each simulation (i.e., after the final time point; see Figure  
304 1). 60 of the 68 metabolites present in the nutrient inflow exhibited at least some variation  
305 across communities, as did 18 additional microbially-produced metabolites. Metabolite  
306 variation was generally low (median coefficient of variation 0.021), reflecting a relatively  
307 stable nutrient environment, yet 25 metabolites (32%) did have a coefficient of variation  
308 greater than 0.1. For downstream analysis, we excluded metabolites without substantial  
309 measurable variance across samples, filtering those with variance at or below the 25<sup>th</sup>  
310 percentile. This resulted in a dataset of 52 variable metabolites, of which 14 are purely

311 microbially-produced metabolites, 9 are microbially-produced but also present in the  
312 nutrient inflow, and 29 are introduced only through the nutrient inflow. Of these 52 variable  
313 metabolites, 47 are utilized by any member of the community (including 18 that are cross-  
314 fed in at least one simulation). The final species compositions and the final concentrations  
315 of several key metabolites across all simulations are shown in Figure 2A-F, and ordination  
316 plots of species and metabolite data are shown in Figure S2.

317  
318 Exploring this dataset, we found that species composition and metabolite concentrations  
319 exhibited complex patterns and biologically reasonable distributions (Figure S3) (49).  
320 Several metabolic processes known to occur in the mammalian gut were replicated by  
321 our simulations, including, for example, conversion of acetate to butyrate by *E. rectale*  
322 (48), and production of key microbial metabolites such as 4-aminobutyric acid (GABA),  
323 indole, and succinate. Cross-feeding relationships were observed frequently (18  
324 metabolites), including cross-feeding of 6 amino acids, whose exchange is widespread in  
325 host-associated microbiota (50). Additionally, we ran several sets of simulations with  
326 introduced fluctuations in the nutrient inflow concentrations, and found that the resulting  
327 species compositions partially recapitulated the diet responses observed by Faith *et al.*  
328 (47) (Supplementary Results).

329  
330 Clearly, the model and simulations described above represent a gross simplification of  
331 the microbiome's structure, dynamics, and function. Importantly, however, this  
332 simplification is also an important strength. Specifically, the data obtained from these  
333 simulations provide a unique opportunity to examine the relationship between community  
334 dynamics and metabolic activity in a realistic, yet tractable model of community



335 metabolism where complete information about the activity and fluxes of each microbial  
336 species is available (Figure S4). Indeed, our multi-species model captures many of the  
337 intricacies of bacterial genome-scale metabolism and the interconnectedness (both within  
338 and between species) of multiple metabolic processes, yet without additional complexities  
339 inherent to *in vivo* communities. Furthermore, in our simulations, variation in the  
340 concentrations of environmental metabolites results exclusively from microbial metabolic  
341 activity, with no variation in nutrient inflow or other non-microbial sources, providing a  
342 controlled setting for evaluating the relationship between community members and  
343 metabolite concentrations.

344

#### 345 ***Metabolite variation is driven by diverse microbial mechanisms***

346 Given the simulated dataset described above (for which uptake and secretion fluxes are  
347 known), we applied our contribution framework to calculate the contribution of each  
348 species to the variation observed in each of the 52 variable metabolites (Figure S5). The  
349 resulting contribution values can be used as ground-truth information about the link  
350 between microbial activity and environmental metabolites.

351

352 To highlight the nature and utility of such contribution values, and to demonstrate how  
353 metabolic fluxes translate into contribution profiles, we first describe our results for several  
354 example metabolites (Figure 2). Putrescine, an amino acid fermentation product, is an  
355 example of the simplest case, in which one microbial species – *E. coli* – synthesizes a  
356 metabolite that is not utilized or modified by other community members. Variation in the  
357 environmental concentration of putrescine was hence fully determined by the level of

358 secretion from *E. coli*, which is therefore assigned a relative contribution of 1 (Figure 2B).  
359 Tetradecanoic acid, in contrast, was introduced (at a constant rate) via the nutrient inflow  
360 and utilized by the three *Bacteroides* species in the community to varying degree  
361 (primarily by *B. ovatus* and to a slightly lesser extent by *B. thetaiotaomicron*). The  
362 calculated contribution values successfully attributed variation in the environmental  
363 concentration of this metabolite to these three species, and correctly captured the  
364 difference in the magnitude between their effects (Figure 2C). Variation in uracil, another  
365 metabolite introduced via the nutrient inflow, was mainly driven by large shifts in its uptake  
366 by *B. ovatus*, but this effect is partially masked by *E. rectale*, which reduced its uptake  
367 when *B. ovatus*' flux was high and vice versa. Other species also utilized uracil, but at  
368 relatively similar levels across samples, and accordingly with relatively little impact on its  
369 variation. These complex patterns were all captured by the contribution profile obtained  
370 by our framework, with *B. ovatus* assigned a high positive contribution, *E. rectale*  
371 assigned an intermediate *negative* contribution, and other species assigned relatively  
372 negligible contribution values (Figure 2D). More complex species-metabolite relationships  
373 were also accurately and effectively summarized. Contribution values for acetate, for  
374 example, reflected the cross-feeding interactions that underlie variation in its  
375 concentration (Figure 2E). It was introduced to the shared environment by several species  
376 (primarily *C. symbiosum*), but most of its variation ultimately depended on the level of  
377 uptake by *E. rectale*. Finally, the contribution profile of succinate demonstrates how  
378 extremely strong interspecies interactions can produce contribution values much greater  
379 than the observed variance (Figure 2F). In the simulated data, this metabolite was  
380 synthesized by *B. hydrogenotrophica*, but was almost always fully utilized by other

381 community members. The calculated contributions suggest that if the synthesis of  
382 succinate by *B. hydrogenotrophica* would not have been offset by uptake from other  
383 species, the variance in succinate concentration across samples would have been 71.7  
384 times higher than is actually observed. (Note that the difference between positive and  
385 negative is always 1.)

386  
387 Examining the complete set of variable metabolites and calculated contribution values  
388 revealed similar patterns of interactions (Figure S5). Specifically, as for the metabolites  
389 discussed above, negative contributions and/or contribution values greater than 1 were  
390 widespread. Nearly all metabolites (50 out of 52) had at least one species with a negative  
391 contribution value, and 36 had at least one species with a contribution value greater than  
392 1. Of the 32 other metabolites with negative contributions, 29 were present in the nutrient  
393 inflow and their negative contributions result from competition between species for their  
394 uptake. This prevalence of negative and extreme values suggests that strong negative  
395 interspecies interactions have substantial impacts on metabolite concentrations, and that  
396 often, observed variation in a given metabolite's concentration is the complex outcome of  
397 multiple species generating and offsetting much higher variation.

398  
399 It is also important to note that while the average metabolic uptake/secretion flux of each  
400 species and the magnitude of its contribution to a given metabolite were generally  
401 significantly correlated (Spearman,  $p < 0.01$  for 49 of the 52 metabolites), the species with  
402 the highest flux was often *not* the largest contributor to variation (26 of the 52 metabolites).  
403 Similarly, the variance in a species' flux was significantly correlated with its contribution

404 for 48 of the metabolites, but for 9 metabolites the species with the most variable flux was  
405 still not the largest contributor (due to differences in whether variable flux generated by  
406 one species is compensated by variation in the flux of another). These findings suggest  
407 that even if the magnitude and variation of species uptake and secretion fluxes across a  
408 set of microbiome samples are known (rather than just the abundances of species, which  
409 is the only measure usually assayed), metabolic interdependence between species would  
410 still make true contributor species challenging to identify.

411  
412 Combined, the observations above highlight the complex relationship between species  
413 activity and measured metabolite concentrations, demonstrating the important role of both  
414 direct and indirect species interactions. This complex relationship, observed even in the  
415 idealized settings of our simulation model, is potentially markedly more complex than  
416 what is assumed by many microbiome-metabolite association-based analyses.

417  
418 ***Correlation analysis fails to detect true microbial contributors to metabolite***  
419 ***variation***

420 Given our observations above, we next set out to comprehensively assess how well  
421 pairwise correlation analysis (commonly used for analyzing microbiome-metabolome  
422 data) can detect true taxonomic contributors to metabolite variance. Put differently, we  
423 evaluated the extent to which a correlation between species abundance and metabolite  
424 concentration across samples captures the true causative contribution of a species'  
425 metabolic activity to observed metabolite variation.

426

427 Following numerous microbiome-metabolome studies (14, 23, 28, 51), we considered  
428 identifying species-metabolite relationships as a classification task, aiming to identify for  
429 each metabolite the set of species that are primarily responsible for the variation observed  
430 in its concentration across samples. To this end, we defined *key contributor* species for  
431 each metabolite as those with a contribution value greater than 10% of the total positive  
432 contribution values. This resulted in a set of 83 species-metabolite key contributor pairs,  
433 representing true links between species activity and metabolite variation. On average,  
434 each metabolite had only 1.6 contributors (Figure S6), although 7.5 species on average  
435 had utilized or synthesized each metabolite at any point. 31.3% of these contributions  
436 occurred via synthesis reactions, 66.3% via utilization, and 2.4% (2 instances) via both  
437 processes. We then calculated the Spearman rank correlations between species  
438 abundances and metabolite concentrations across samples, and used a *p*-value  
439 threshold of 0.01 to define significant correlation between species and metabolites. This  
440 produced a set of 191 significant species-metabolite correlations, representing putative  
441 species-metabolite links. Scatter plots of these species-metabolite abundance  
442 relationships are shown for several example pairs in Figure S7.

443  
444 Comparing this set of significant species-metabolite correlations to the set of species-  
445 metabolite key contributors clearly illustrated the difficulty of using univariate associations  
446 to infer mechanistic contributions (Figure 3). Indeed, of the 191 significant species-  
447 metabolite correlations, the vast majority (141) were false positives (corresponding to a  
448 positive predictive value of only 26.2%), and did not represent true contributor  
449 relationships (Figure 3A). Moreover, more than a third of these false positive species-  
450 metabolite pairs (51 out of 141) had *no* mechanistic connection; i.e., the species did not

451 ever use or produce the metabolite in question. Furthermore, for 12 variable metabolites  
452 (out of 52), none of the key contributors were successfully detected by a correlation  
453 analysis. The overall accuracy was somewhat higher (66.5%), reflecting the high number  
454 of non-contributors that are also not correlated. Using a stricter cutoff ( $p < 0.0001$ ,  
455 equivalent to a Bonferroni-corrected value of 0.05) only improved the positive predictive  
456 value to 33% and the accuracy to 77.1%. Indeed, a ROC curve analysis (Figure 3B)  
457 produced an area under the curve of 0.72, and overall correlations and scaled contribution  
458 values were only weakly associated (Figure 3C), suggesting that these findings can only  
459 be partially mitigated by changing classification thresholds. Metabolites of different  
460 classes had generally similar correspondence between correlations and contributions  
461 (Figure 3D).

462  
463 Notably, key contributors for purely microbially-produced metabolites were not identified  
464 more accurately than those for metabolites in the nutrient inflow (66% versus 67%), which  
465 is perhaps not surprising since we used a constant inflow across samples (but see also  
466 our analysis below with variable inflow). Moreover, the total variance in a metabolite was  
467 not associated with the accuracy or predictive value with which key contributors for that  
468 metabolite were identified (Spearman rho,  $p > 0.1$ ). Across species, contributions were  
469 identified most accurately for *D. piger*, which had a relatively low number of contributions  
470 (Figures 3E and S5C), but the positive predictive value was nonetheless <50% for all  
471 species.

472  
473 We obtained similar results across several variants of this analysis (Supplementary

474 Results, Figures S6, S8, and S9). To assess the impact of dynamic shifts over the  
475 duration of each simulation, we calculated an alternative set of contribution values based  
476 on the net steady-state metabolite flux rates at the final time point of each simulation,  
477 finding extremely similar results as for contributions to cumulative variation in  
478 concentration. We also evaluated the use of an alternative classification task, aiming to  
479 detect all microbes that affect variation in a given metabolite across samples regardless  
480 of whether their effects are ultimately reflected in the observed concentrations (i.e. those  
481 with large positive or negative contributions), again resulting in similar findings  
482 (Supplemental Results, Figure S6). Finally, we profiled the effects of model simulation  
483 parameters on correlation results, including the simulation length and the maximum  
484 enzymatic rate  $V_{max}$ , again finding minimal effects on contribution and correlation  
485 results (Supplementary Results, Figures S8-9).

486  
487 ***Species and metabolite properties explain discrepancies between correlations***  
488 ***and contributions***

489 Our analysis above demonstrated that correlations between species abundances and  
490 metabolite concentrations can often be only poorly associated with true contribution of  
491 species to metabolite variation. We therefore next investigated the origins of such  
492 discrepancies. We examined whether individual metabolites or species are predisposed  
493 to produce a significant species-metabolite correlation when the species in fact does *not*  
494 contribute to that metabolite variation (i.e., false positives), or to mask such correlation  
495 when the species *does* in fact contribute to this metabolite variation (i.e., false negatives),  
496 and if so, what species and metabolite properties are linked to those outcomes.

497

498 To determine whether the identity of the species or metabolite in question can explain  
499 inaccurate identifications of key contributors, we used a regression-based analysis.  
500 Specifically, we considered all species-metabolite non-contributor pairs, and fitted a  
501 logistic regression model to predict whether a species-metabolite pair exhibited significant  
502 correlation (false positive), based on either species identities, metabolite identities, or  
503 both (Methods). We then compared these three models using a likelihood ratio test to  
504 assess whether species and/or metabolite identities are informative. We similarly  
505 considered all species-metabolite key contributor pairs separately, again fitting a logistic  
506 regression model based on species identities, metabolite identities, or both to predict  
507 whether a pair failed to exhibit significant correlation (false negative).

508  
509 For non-contributors, we found that false positives can be explained largely by species  
510 identity (likelihood ratio test (LRT) for inclusion of species terms  $p < 10^{-13}$ ). Incorporating  
511 both species and metabolite identities did not significantly improve the model (LRT for  
512 metabolite terms  $p=0.72$ ). This finding suggests that false positives – correlations  
513 observed between species and metabolites to which they in fact did not contribute – are  
514 the outcome of interactions at the species level, regardless of the metabolite in question.  
515 This impact of strong interactions between dataset features on association test results  
516 has been described extensively in other data types (33, 34). Indeed, examining the 141  
517 false positives identified above, we found that many can be explained by the relationships  
518 between the three dominant species in this community: *E. rectale*, *B. thetaiotaomicron*,  
519 and *B. ovatus*. These species competed strongly for carbon sources (and utilized their  
520 maximum allocation of sucrose, glucose, and fructose at nearly every step of the



521 simulation), and their abundances were therefore negatively correlated. As a result,  
522 metabolites that varied due to the activity of one of these species were also frequently  
523 correlated with the other two. In total, 32 false positive correlations paired one of these  
524 species with a metabolite for which another species in this trio was a key contributor.  
525 More generally, we found that the probability of a false positive correlation for a particular  
526 species and metabolite depended on the species' correlation with the true key  
527 contributors for that metabolite ( $p=0.006$ , Spearman rho between share of false positives  
528 and interspecies correlation; Figure 4A). Moreover, the maximum correlation each  
529 species had with any other species is a strong predictor of its overall specificity, which  
530 varies widely from 33.3% for *E. rectale* to 92% for *D. piger* (Spearman rho=-0.84,  
531  $p=0.002$ ). We also found that species identity was similarly predictive of whether a  
532 significantly correlated metabolite-species pair represented a true contributor versus a  
533 false positive (Supplementary Results).

534  
535 In the case of key contributors, we found that false negative correlations can be explained  
536 largely by metabolite identity (LRT for metabolite terms  $p=0.002$ ; although the species  
537 involved was also somewhat informative with LRT  $p=0.08$ ). Put differently, a lack of  
538 correlation between the abundance of a key contributor species and the concentration of  
539 the metabolite to which it contributed was determined mainly by the nature of the  
540 metabolite in question. This lack of correlation between a given metabolite and its  
541 contributors could have resulted from competition or exchange of a metabolite between  
542 multiple species, such that none of the involved species end up strongly associated with  
543 the final outcome on their own. Indeed, across all metabolites, the average correlation

544 between a metabolite and its key contributors is negatively associated with its number of  
545 key contributors (Spearman  $\rho=-0.45$ ,  $p=0.0008$ ). The number of key contributors for  
546 any metabolite was also thus negatively associated with the sensitivity of contributor  
547 detection for that metabolite (Spearman  $\rho=-0.48$ ,  $p=0.0004$ ; Figure 4B). We further  
548 hypothesized that false negative outcomes might be more common for metabolites with  
549 more or larger negative species contributions, since these, by definition, mask or  
550 compensate for the activity of key contributor species. While all metabolites with a false  
551 negative outcome did have at least one species with a negative contribution value, as  
552 mentioned above, this was true for nearly all analyzed metabolites (50/52), and the  
553 number of negative contributing species was not associated with the occurrence of a false  
554 negative correlation ( $p=0.86$ , Wilcoxon rank sum test). Moreover, we also did not observe  
555 any effect of the average concentration of a metabolite on the sensitivity and accuracy of  
556 its detection via correlation analysis, nor of whether it is secreted, utilized, or cross-fed  
557 (Figure 4C). In summary, our analysis suggests that the largest factor explaining whether  
558 a metabolite's key contributor can be detected by a correlation analysis is simply whether  
559 there are other community members (key contributors) that also impact the observed  
560 concentration of that metabolite.

561  
562 ***Environmental fluctuations in metabolite concentrations impact detection of key***  
563 ***contributors***

564 Our analyses above all focused on a single simulated dataset in which the nutrient inflow  
565 was constant across all samples, meaning that metabolite variation was fully governed  
566 by microbial activity. However, in reality, metabolite variation can and does arise also from  
567 non-microbial sources, potentially affecting both the landscape of key microbial

568 contributors and our ability to detect them via correlation-based analyses. To explore the  
569 impact of environmental fluctuations, we therefore ran several sets of additional  
570 simulations with varying degrees of nutrient fluctuation, designed to emulate a range of  
571 levels of experimental diet control and variation in host absorption across the simulated  
572 mouse gut communities. In these simulations, we maintained the same set of 61 initial  
573 species compositions but added small amounts of stochastic noise to the nutrient inflow,  
574 sampling inflow concentrations for each compound in each simulation from a normal  
575 distribution with a mean equal to the compound's original inflow rate and a standard  
576 deviation ranging from 0.5% to 10% of the mean in 8 increments (Methods). For each of  
577 the resulting 8 datasets, we again calculated contribution values (with the added element  
578 of the nutrient inflow as a potential contributor to variance), identified key contributors,  
579 and compared them with the results of a correlation analysis.

580  
581 Examining the obtained contribution values, we found, as expected, that variation in inflow  
582 quantities can outweigh the variation in microbial fluxes, and that as the variation in inflow  
583 increases, its contribution to metabolite variation increased at the expense of the  
584 contributions of community members (Figure 5A). As a result, the number of key  
585 contributions attributed to each species decreased for metabolites in the nutrient inflow  
586 (Figure 5B). Interestingly, however, some species lost their contributions more gradually  
587 than others, and in some cases even became key contributors for additional metabolites  
588 (Figure 5B). For most metabolites, the relative ranking of species with the highest  
589 contribution values was unchanged with increasing fluctuations (Supplementary Results).  
590

591 We next examined how correlation-based detection of key microbial contributors was  
592 affected by these inflow fluctuations. We assigned each of the 52 metabolites in each of  
593 the 9 datasets (the original dataset with no inflow fluctuations and the 8 datasets with  
594 varying degree of fluctuations) to bins according to the level of contribution attributed to  
595 the inflow for this metabolite at that degree of fluctuation (see Methods). We then  
596 evaluated the performance of correlation analysis for each bin separately. The share of  
597 true key contributors naturally decreased rapidly with increasing environmental  
598 contribution, as did the number of significantly correlated species-metabolite pairs (Figure  
599 5C). Importantly, however, the sensitivity of correlations decreased substantially with the  
600 level of contribution attributed to the inflow, but the specificity in fact increased from 67.7%  
601 to 92.3% (Figure 5D). This suggests that while environmental fluctuations disrupted the  
602 signal linking microbial species with the metabolites they impact, they also disrupted  
603 indirect associations between species and metabolites (false positives). Overall,  
604 however, the AUC did not change significantly with increasing environmental contribution  
605 (Figure S10A), and the positive predictive value is similarly relatively stable (and never  
606 rose higher than 37%). Interestingly, the detection of some metabolites not present in the  
607 inflow was also affected by inflow fluctuations in a similar manner (Supplementary Text,  
608 Figure S10B).

609

610 ***Correlation analysis is similarly limited in simulations of more complex and***  
611 ***diverse human gut microbiota***

612 Our results have illustrated consistent discrepancies between microbe-metabolite  
613 correlations and microbial contributions to metabolite variation in a model ten-species

614 community. We lastly addressed the question of whether these findings generalize to  
615 more complex mammalian gut microbiota, communities with many times more taxa and  
616 a more uneven distribution across individuals. To do so, we ran an additional set of  
617 simulations emulating human gut microbiota transplanted into gnotobiotic mice. We first  
618 mapped 16S rRNA sequence variants from the Human Microbiome Project (52) to the  
619 genomes of the AGORA model collection at 97% sequence identity (40), and selected 57  
620 samples with a successful mapping rate greater than 25% relative abundance. The total  
621 share of mapped reads averaged 36.7% across these samples, with a maximum of  
622 73.5%. Despite this variation, mapped reads displayed features typical of Western gut  
623 microbiomes, including a predominance of Bacteroidetes and Firmicutes phyla along with  
624 varying lower abundances of Actinobacteria and Proteobacteria (Figure 6A). The number  
625 of species identified in each sample ranged from 23 to 62, with a median of 42. We ran a  
626 simulation based on each sample by setting the initial species relative abundances  
627 according to the relative abundances of mapped reads, while maintaining the same  
628 physical parameters as previous simulations (see Methods for additional details). We  
629 used nutrient inflow quantities with 1% standard deviation between samples. Initial  
630 species compositions displayed characteristic shifts in abundance over the simulation  
631 time course (Figure S11A). Metabolites were also highly variable, with a median  
632 coefficient of variation of 71% across 222 metabolites (Figure S11B). We calculated  
633 contribution values for this dataset, finding a smaller share of key contributions (only 392  
634 out of 29,082 possible species-metabolite pairs). Only 35.1% of species (46 out of 131)  
635 were identified as key contributors to any metabolite. The genera with the most  
636 contributions were *Bacteroides*, *Ruminococcus*, and *Enterobacter*, which were also three

637 of the four most abundant genera in the final dataset (Figure 6B).

638

639 In this noisier and more layered dataset, only a small share of species-metabolite pairs  
640 was significantly correlated. In order to fairly compare with the previous dataset while  
641 accounting for the larger number of hypothesis tests, we defined significance based on  
642 an equivalent Benjamini-Hochberg estimated false discovery rate (0.027) as the  $p < 0.01$   
643 cutoff used for the previous dataset. 2.2% of species-metabolite pairs displayed  
644 significant correlations at this cutoff ( $p < 0.00058$ ). This level of correlation is comparable  
645 to a recent microbiome-metabolome study of the colon of healthy humans (51), in which  
646 1.4% of OTU-metabolite pairs displayed Spearman correlation coefficients of the same  
647 effect size. In our dataset, correlation analysis detected contributors with high specificity  
648 (98.4%), and an area under the ROC curve of 0.89. However, the positive predictive value  
649 was still only 29.0%, rising as high as 57% with a significance cutoff of  $p < 10^{-10}$ . We  
650 compared these classification results with the original dataset, finding that despite the  
651 difference in overall AUC, sensitivity, sensitivity, and predictive value are similar or worse  
652 for the two datasets at commonly used FDR thresholds between 0.1 and 0.01 (Figure  
653 6C), and sensitivity and predictive value are both highly dependent on the choice of  
654 significance threshold. As in the ten-species dataset, a large share of false positive  
655 species-metabolite pairs (65.4%, 291 out of 445) also involved species with no capacity  
656 to impact the metabolite in question.

657

658 The outcomes of correlation analysis were influenced by the same factors as observed in  
659 the model community dataset, but also by several additional characteristics. False

660 positive classifications were, again, driven by interspecies covariance: Species  
661 significantly correlated (at 10% FDR) with a true key contributor for a metabolite were  
662 13.6 times more likely to have a false positive correlation with that metabolite than species  
663 with no such link ( $p < 10^{-16}$ ). Notably, the false positive rate of a given species was also  
664 substantially affected by its prevalence: the number of samples in which a species was  
665 present was negatively associated with its specificity (Spearman rho = -0.57,  $p=0.002$ ,  
666 Figure S11C), among species with at least 3 key contributions. In other words, widely  
667 prevalent species were more prone to false positive correlations than rarer species.

668  
669 False negative contributions were again influenced by properties of both metabolites and  
670 species. As in the ten-species dataset, species contributions to metabolites with more  
671 than one key contributor were 5.2 times more likely to not be correlated than those that  
672 were the sole key contribution for a metabolite ( $p < 10^{-10}$ , Fisher exact test). In this dataset,  
673 an elevated share of these metabolites with multiple key contributors were cross-fed  
674 between different species ( $p=0.00007$ , Fisher exact test), and correspondingly, key  
675 contributors for cross-fed metabolites were also 1.6 times less likely to be significantly  
676 correlated ( $p=0.02$ ). Both cross-feeding and false negative outcomes occur variably  
677 across metabolite classes, with nucleotide metabolites having the highest rates of both  
678 phenomena (Figure S11D). Taken overall, our simulations and analysis of this realistic  
679 microbiota simulation demonstrates that correlation analysis can have greater utility in a  
680 microbial community dataset with greater complexity and variability, but the results are  
681 again strongly influenced by properties of individual metabolites and species.

682

683

## 684 **Discussion: Insights and implications for microbiome-** 685 **metabolome analyses**

686 Above, we have investigated the ability of correlation-based analyses to detect key  
687 microbial contributors responsible for variation in metabolite concentrations across  
688 samples. Our findings suggest that microbe-metabolite correlation analysis may be a  
689 useful approach for exploratory analyses, but they highlight some of the limitations and  
690 caveats of such microbiome-metabolome studies and identify several factors that impact  
691 the relationship between community composition and metabolite concentrations. Below,  
692 we elaborate on a set of practical conclusions and their implications for the analysis and  
693 interpretation of microbiome-metabolome studies.

694

695 **Association-based analyses of microbiome-metabolome assays have low**  
696 **predictive value for detecting direct species-metabolite relationships and require**  
697 **conservative interpretation.** Microbiome-metabolome association studies have been  
698 previously proposed as a powerful tool for the identification of causal mechanisms of  
699 microbiome metabolism (53), and indeed, such studies often present detected  
700 associations as evidence for mechanistic relationships (11, 27, 29). However, our  
701 analysis suggested that the positive predictive value of significant species-metabolite  
702 correlations for identifying true microbial contributors can be extremely low: less than 50%  
703 across all settings, as low as 10% in the context of large environmental fluctuations, and  
704 29% in simulations based directly on human gut composition. Recent experimental



705 studies pairing microbiome-metabolite correlation analysis with *in vitro* monoculture  
706 validations have similarly anecdotally observed many false positive correlations (32).  
707 Additionally, given the somewhat low sensitivity observed in our analysis, a lack of  
708 association is not necessarily sufficient to reject a hypothesis that a particular microbial  
709 taxon impacts a particular metabolite. The choice of correlation threshold should therefore  
710 be chosen carefully, taking into account the complexity of the community and the  
711 environmental context. In general, identified correlations between microbial taxa and  
712 metabolites should be interpreted very conservatively and used mostly to prioritize  
713 microbe-metabolite relationships for follow-up validation studies (e.g., via culture-based  
714 studies or germ-free model organism colonization). One potential approach for improving  
715 the predictive value of such correlation-based analyses is to examine whether they  
716 replicate across multiple conditions. Indeed, we found that a correlation does provide  
717 stronger evidence for a contributor relationship if it persists across different contexts.  
718 Across our 9 simulated datasets with varied environmental fluctuations, the 43 species-  
719 metabolite pairs that were significantly correlated in every dataset were 2.1 times more  
720 likely to denote true key contributor relationships than other significant correlations (Fisher  
721 exact test,  $p=0.05$ ), although their positive predictive value was still relatively low (39.5%).  
722 Of the limited number of significant correlations shared between our original and HMP-  
723 based datasets ( $n=5$ ), all were false positives in both datasets, reiterating the need for  
724 caution.

725  
726 **The predictive power of correlation-based analysis is species-, metabolite-, and**  
727 **context- dependent.** In our datasets, metabolites varied widely in both contribution  
728 profiles and in their detectability via correlation analysis. In particular, the key contributors

729 for metabolites acted upon by fewer species, and potentially those that are not exchanged  
730 between different species, were identified more readily. Moreover, in our simulations of  
731 human gut communities, contributions by less prevalent species were identified much  
732 more accurately than those by widely-found species, indicating that hypotheses based on  
733 associations of rarer species should potentially be prioritized. Correlation analysis may  
734 thus identify microbes involved in specialized secondary metabolic processes (e.g.  
735 products of complex biosynthetic pathways) more readily than those involved in more  
736 widespread processes.. Therefore, correlation-based approaches may be more  
737 informative for analyzing compounds that are specific to a small number of rare taxa, but  
738 accurate dissection of the taxa controlling variation in widely-trafficked metabolites may  
739 require more detailed analysis and experimentation. Similarly, we found that species-  
740 metabolite correlations for species that are strongly associated with other taxa (e.g., those  
741 with tight interactions with other community members) are often spurious, suggesting that  
742 such correlations should be regarded less confidently.

743  
744 **External metabolic fluctuations can strongly impact the detection of microbial**  
745 **contributions.** Our analysis of the impact of environmental fluctuations suggested that  
746 the presence of environmental variability from a diverse set of samples could in fact  
747 increase correlation specificity. We also found that the sensitivity of correlation analysis  
748 rapidly decreased with increasing environmental fluctuations (from 60% to 9%). These  
749 observations suggest that while a tightly controlled environment (e.g., identical diets) is  
750 intuitively expected to increase the strength of microbiome-metabolome studies, its value  
751 depends on the study priorities. Specifically, if the goal is to identify clear-cut microbial  
752 drivers of healthy- and disease-associated metabolite shifts, stochastic variation in

753 nutrient availability could be beneficial as it may reduce the rate of false positive  
754 associations. In contrast, for studies searching for a particular microbial taxon's  
755 involvement in a particular process (e.g. aiming to determine whether an ingested  
756 probiotic impacts aspects of gut metabolism), a more controlled environment may be  
757 favorable. It should, however, be noted that our findings were based on environmental  
758 fluctuations that were uniform and independent, which may not hold for real-life  
759 environmental fluctuations such as diet variation. It is also worth noting that in our  
760 simulations, microbial fluxes for some environmental metabolites could be drowned out  
761 by as little as 0.5% variation in nutrient inflow quantities, while others still had substantial  
762 microbial contributions even with 10% variation in inflow. When interpreting an observed  
763 association, the scale of possible microbial variation relative to external variation should  
764 therefore be taken into account.

765

766 **Mechanistic reference information can improve the predictive power of**  
767 **microbiome-metabolome studies.** In our simulated dataset, 36% of the false positive  
768 correlations occurred between a metabolite and a species that was in fact not capable of  
769 uptaking or secreting that metabolite. Ruling out such falsely detected links would  
770 substantially improve the positive predictive value of a correlation-based analysis. One  
771 approach for doing so is by utilizing genomic information, which can be obtained or  
772 predicted for many microbial taxa (54). By coupling such genomic information with  
773 metabolic databases such as KEGG or MetaCyc (55, 56), researchers can filter out  
774 correlation-based links that are likely not feasible causative relationships. Further  
775 improvement can be obtained by integrating such reference information directly into the

776 analysis. Indeed, we previously introduced a computational framework, termed MIMOSA  
777 (57), that utilizes a simple community-wide metabolic model to assess whether measured  
778 metabolite variation is consistent with shifts in community metabolic potential, and to  
779 identify potential contributing taxa. MIMOSA has been applied to varied host-associated  
780 microbiomes from varied body sites and from human and mouse hosts (12, 58, 59).  
781 Applying MIMOSA to the simulated ten-species dataset analyzed above (Methods), we  
782 found that it indeed identified key contributors significantly more accurately than a  
783 correlation-based analysis, with an AUC of 0.89 (Figure 6). Notably, in this analysis, we  
784 assumed MIMOSA has access to the correct set of metabolic reactions possessed by  
785 each species. Using standard less-complete information obtained directly from the KEGG  
786 database (as done regularly when using this tool) reduced the number of metabolites that  
787 could be analyzed from 52 to 39, with improved specificity (96%) and positive predictive  
788 value (61%) and an ultimately comparable AUC (0.74). Combined, these findings suggest  
789 that reference model-based approaches can provide stronger evidence for mechanistic  
790 relationships than strictly correlation-based methods, but their use depends on complete  
791 and high-quality metabolic reference databases.

792

## 793 **Future opportunities and challenges**

794 Microbiome-metabolome studies have an important role in microbial ecology research.  
795 They specifically have great potential to dissect the metabolic interactions of complex  
796 microbial communities, and to unify “top down” and “bottom up” microbiome research  
797 approaches by providing mechanistic information at a systems level. Moreover, from a

798 translational perspective, microbiome-metabolome studies can inform efforts to design  
799 targeted therapies to alter specific microbial or metabolic features of a community (13).  
800 Such interventions require first identifying putative targets, which in many cases may  
801 entail identifying the key contributor species that drive observed shifts in a particular  
802 beneficial or detrimental metabolic phenotype.

803  
804 Importantly, while we show here that a correlation-based analysis may be limited in its  
805 ability to identify these key microbe-metabolite links, this does not necessarily imply an  
806 inherent limitation of microbiome-metabolome data. For example, analyzing our data, we  
807 found that species abundance is in fact a very good proxy for metabolic activity (median  
808 correlation of 0.996 between abundance and flux for all species-metabolite pairs),  
809 meaning that the variance in total species abundance drastically outweighs the individual-  
810 level variance in flux rates. When we further examined whether false negative  
811 associations in our original dataset stem from a disconnect between the abundance of a  
812 species and its metabolite uptake or secretion rates, we identified only 2 undetected key  
813 contributor pairs that could be explained by such a discrepancy. This analysis suggests  
814 that taxonomic abundance data is sufficient to explain and model community metabolic  
815 variation to great extent, despite common concerns about potential discrepancies  
816 between community composition and function. It also suggests that metatranscriptomic  
817 expression data may not provide much additional value for this purpose, as other studies  
818 have indicated (54, 60, 61).

819

820 Given the increasing prevalence of microbiome-metabolome studies, their promise, and  
821 the caveats of association-based research discussed above, further development of  
822 computational and statistical methods for analyzing such datasets is clearly needed.  
823 Possible directions include the use of multi-species dynamic metabolic models that can  
824 replicate experimental observations (62), multivariate approaches for deconvolving  
825 interactions between species and the environment (63, 64), and probabilistic methods  
826 that can integrate prior information while allowing for other unknown mechanisms (31,  
827 65). The conceptual framework of taxon-metabolite contributions, and the use of dynamic  
828 simulations demonstrated here, can both inform the future development and evaluation  
829 of such methods.

830

831 There is also a continued need for gold standards to evaluate new methods. This study  
832 is only a first step in that direction and has analyzed one specific type of research  
833 question: identifying microbial taxa directly responsible for variation in metabolite  
834 concentrations between samples in a cross-sectional study design. Although this focus  
835 describes many recent microbiome-metabolome studies, other studies may address a  
836 wide range of complementary research questions, and correspondingly, the desired  
837 “ground truth” can take different forms. Moreover, depending on the objective, an  
838 alternative definition of a taxon-metabolite relationship may be required. For example, it  
839 may be valuable to identify key contributors that act via alternative mechanisms, such as  
840 by modifying substrate availability or environmental conditions (for example (66)), or to  
841 distinguish metabolite variation arising in response to a perturbation from variation due to  
842 differences in steady-state metabolism between communities. Additionally, our findings

843 rely on an *in silico* system that may not capture many aspects of community ecology and  
844 metabolism, and it is possible that the predictive value of correlation analysis, as well as  
845 of other analytical methods, differs fundamentally in this system as compared to true  
846 biological systems. Further studies should also consider additional variables such as  
847 community diversity, sample size, measurement error, and other types of environmental  
848 variation. Ongoing technology developments in mass spectrometry and stable isotope  
849 probing will ideally enable future evaluation analyses using experimental, quantitative,  
850 species-specific community flux data to define key microbial contributors (67, 68). Such  
851 evaluations can also take advantage of datasets comparing community microbiome-  
852 metabolome data with *in vitro* monoculture or mono-colonization data (32, 35, 36).

853  
854 Ultimately, much remains to be learned about the many processes through which  
855 complex microbial communities shape their environment. The first major call for the  
856 application of metabolomics to microbiome research, published 10 years ago (69), noted  
857 that new methods will be necessary to integrate genomic and metabolic data and inform  
858 the prediction of community metabolic properties from metagenomes. Now that  
859 microbiome-metabolome datasets are widely available, ongoing development of analysis  
860 methods for these studies has great potential to generate new knowledge. Moreover,  
861 future work in this area stands to benefit from the utility of dynamic, multiscale metabolic  
862 modeling. Detailed mechanistic simulations are used widely in astronomy, climate  
863 science, and other fields to make methodological choices and assess possible  
864 experimental outcomes when ground truth measurements are unavailable or difficult to  
865 obtain (70, 71). An analogous strategy in microbiome research may be similarly fruitful.

866

867

## 868 **Methods**

### 869 ***Derivation of species contributors to variation***

870 We derived an expression representing the contribution of each species to the variance  
871 in the concentration of each metabolite. While we describe this calculation in terms of  
872 species, a similar calculation could be done at the level of phyla, strains, or any grouping  
873 of the community for which metabolite secretion and uptake fluxes are available.

874

875 The concentration of a given metabolite  $M$  at the end of a single simulation run is a  
876 function of the uptake and secretion fluxes (responding to the species' degradation and  
877 synthesis activities) of the  $n$  species, the environmental inflow over all time steps  $m_{in}$ , and  
878 the dilution  $m_{out}$  out of the chemostat over all time steps:

879

$$M = \sum_{i=1}^n m_i + m_{in} - m_{out}$$

880

881 The value of  $m_{out}$  at a given time step  $t$  is the product of the dilution rate  $D$  and the  
882 metabolite concentration at the previous time point (see above). This fact can be used to  
883 express  $m_{out}$  in terms of all the previously recorded environmental inflow and microbial  
884 activities. The metabolite concentration at any time point  $t$ ,  $M(t)$ , is then equal to:

885



886 
$$M(t) = \sum_{k=1}^{t-1} \left[ (1-D)^{t-k-1} \sum_{i=1}^n m_{ik} \right] + m_{in} \sum_{k=1}^{t-1} (1-D)^k,$$

887

888 where  $m_{ik}$  represents the activity of species  $i$  at a single time point  $k$ . We can then ignore  
889 dilution outflow by replacing each activity value  $m_i$  in the final concentration calculation  
890 above with a value corrected for the mitigating effect of chemostat dilution over the course  
891 of the simulation up to time  $t$ , defined here as  $m_i^*$ .  $m_i^*$  represents the total amount of a  
892 compound secreted or uptaken by species  $i$ , minus the share of that quantity that is  
893 eventually diluted out over the course of the simulation.

894

895 
$$m_i^* = \sum_{k=1}^{t-1} (1-D)^{t-k-1} m_{ik},$$

896 and thus,

897 
$$M = m_{in} + \sum_{i=1}^n m_i^*$$

898

899 In this work, we refer to “environmental fluctuations” as the effect of the independently  
900 parameterized nutrient inflow,  $m_{in}$ , and where not otherwise specified we use  $m_i$  to imply  
901  $m_i^*$ , a species activity quantity that accounts for the corresponding subsequent dilution  
902 out of the system.

903

904 Using the expression above,  $var(M)$  can then be clearly expressed as a sum of correlated  
905 environmental and microbial random variables:

$$\begin{aligned} 906 \quad \text{var}(M) &= \sum_{i=1}^n \sum_{j=1}^n \text{cov}(m_i, m_j) + \sum_{i=1}^n \text{cov}(m_i, m_{env}) \\ 907 \quad &= \sum_{j=1}^n \text{var}(m_j) + \text{var}(m_{env}) + 2 \sum_{i=1}^n \sum_{j=i+1}^n \text{cov}(m_i, m_j) + 2 \sum_{i=1}^n \text{cov}(m_i, m_{env}) \end{aligned}$$

908

909 This expression can then be partitioned additively into  $n+1$  terms representing the  
910 contribution of each microbial species and of fluctuations in the environmental nutrient  
911 inflow.

912

$$913 \quad c_i = \sum_{j=1}^n \text{cov}(m_i, m_j) + \text{cov}(m_i, m_{env}) = \text{var}(m_i) + \sum_{j \neq i} \text{cov}(m_i, m_j) + \text{cov}(m_i, m_{env})$$

914

### 915 ***Multi-species Dynamic Flux Balance Analysis modeling***

916 In this study, we simulated the growth and metabolism of a community of 10  
917 representative gut species that was previously explored experimentally (47). We  
918 specifically utilized a previously introduced multi-scale framework for modeling the  
919 dynamics and metabolism of multiple microbial species in a well-mixed shared nutrient  
920 environment (44, 72). This framework assumes that each species in the community aims  
921 to maximize its own growth on a short time scale given available nutrients, and uses Flux  
922 Balance Analysis to predict the growth and metabolic activity of each species at this short  
923 time scale (46). The shared environment is then iteratively updated based on the species'  
924 predicted growth, uptake, and secretion rates, such that metabolic interactions are

925 mediated via the environment as a natural byproduct of species activities, rather than  
926 being explicitly modeled (45).

927

928 We used genome-scale metabolic model reconstructions of the 10 community members  
929 from the AGORA collection version 1.01 (40), which have been consistently curated to  
930 remove or modify thermodynamically unfavorable reactions, remove futile cycles, and  
931 confirm growth in anaerobic environments on expected carbon sources, with additional  
932 curation for several biosynthesis pathways. The COBRA toolbox was used to convert  
933 each AGORA model to MATLAB format (73). The growth and metabolism of the 10-  
934 species community were simulated in a chemostat setting in 15-minute time intervals. We  
935 set the chemostat volume to be approximately equal to a mouse gut (0.00134 liter (74)).  
936 We similarly set metabolite inflows to emulate the macronutrient and micronutrient  
937 quantities in a corn-based mouse chow (47) (provided in Supplementary Data 1).

938

939 The simulations were performed following a previously introduced procedure (44),  
940 repeated for each time step  $t_n$ : First, the maximum uptake rate for all metabolites by all  
941 species, denoted as  $v_{jk}$  for metabolite  $j$  and species  $k$ , were calculated based on  
942 Michaelis-Menten single-substrate kinetics, with assumed universal values for maximum  
943 rate  $V_{max}$  and transporter affinity  $K_m$  for all metabolites (provided in Supplementary Data  
944 1).  $v_{jk}$  was further constrained based on an allocation of the metabolite's environmental  
945 concentration to each species in proportion with its biomass. Then, the steady state  
946 reaction fluxes for each species  $k$  at time point  $t_n$  were determined by maximizing the  
947 growth rate  $\mu_k$ , within the obtained constraints on environmental metabolite uptake. To

948 obtain a single and consistent flux solution for each species, the total flux activity for each  
949 species (i.e., the sum of absolute fluxes given the predicted optimal growth rate) was  
950 minimized, under the assumption that organisms prefer to operate their metabolism with  
951 minimal enzymatic cost (75). The optimal flux solutions were solved using linear  
952 programming with GLPK ([www.gnu.org/software/glpk](http://www.gnu.org/software/glpk)). With the resulting flux and growth  
953 rate information, the total biomass of each species  $k$ ,  $bio_k(t_n)$ , was updated for the next  
954 time point  $t_{n+1}$ , using a standard exponential growth function incorporating dilution:

955

$$956 \quad bio_k(t_{n+1}) = bio_k(t_n)e^{\mu_k \Delta t} - bio_k(t_n)D\Delta t,$$

957

958 where  $D$  is the dilution rate. We set  $D$  to 0.0472 per hour, in order to obtain community  
959 growth rates consistent with the observed average growth rate of the three most abundant  
960 species growing under 47 different carbon conditions (76). The total amount of uptake or  
961 secretion for each species  $k$  and metabolite  $j$  over a single time step was then calculated  
962 as previously derived (44):

963

$$964 \quad m_{FBA}^{jk}(t_n) = \frac{v_{jk}}{\mu_k} * bio_k(t_n)(e^{\mu_k \Delta t} - 1),$$

965

966 where  $v_{jk}$  is the rate of uptake or secretion specified by the FBA solution for that species  
967 and metabolite at that time point,  $\mu_k$  is the species growth rate,  $bio_k(t_n)$  is the species  
968 abundance, and  $\Delta t$  is the size of the time step. Finally, combining the flux solutions of all  
969 species, nutrient inflow, and dilution, along with the steady state assumption of no

970 intracellular metabolite accumulation, the concentration of a given metabolite in the  
971 shared nutrient environment at the next time point,  $M_j(t_{n+1})$  can be updated as:

972

$$973 \quad M_j(t_{n+1}) = M_j(t_n) + m_{FBA}^j(t_n) + m_{in}^j \Delta t - M_j(t_n) D \Delta t,$$

974

975 where  $m_{FBA}^j(t_n)$  is the metabolic impact from all species considering their abundance and  
976 their uptake and secretion rates of metabolite  $j$ , and  $m_{in}^j$  is the inflow rate of metabolite  $j$ .

977 This process of calculating uptake rates, Flux Balance Analysis solutions, and updated  
978 metabolite concentrations was then repeated iteratively for the duration of the simulation.

979

980 Each simulation was run for a period of 144 hours or 576 time steps. This time period was  
981 long enough for most simulation runs to approach a steady state composition: specifically,  
982 in >65% of the simulations analyzed in our study, the change in abundance in any species  
983 over the final 3 hours was less than 0.01% of the carrying capacity (see below), and all  
984 had no changes greater than 0.3% of the capacity over that period. The concentrations  
985 of species and metabolites, the species growth rates, and the solved rates of all reactions  
986 for each species (including uptake and secretion) were recorded in each step of each  
987 simulation and used for subsequent analyses (Supplementary Data 1 and 2).

988

### 989 ***Simulation initialization parameters***

990 We fixed the initial total abundances of microbes to the carrying capacity for this system  
991 and media, which was estimated to be 0.433 units of biomass. This capacity was  
992 calculated as the average final total abundance from a set of simulations with varying

993 compositions and low initial abundances. We then varied the relative abundances,  
994 increasing the abundance of one species at a time at the expense of all other species  
995 equally. Specifically, for each species, we ran simulations in which the ratio of that  
996 species' initial abundance relative to all other species was 2, 3, 4.5, 6, 9, and 13 times  
997 (equating to a range in relative abundance of 10% to 60% for each species). This resulted  
998 in a total of 61 simulation runs (one with all species starting at equal abundance and 6  
999 with increased abundance of each species). We chose this sample size to approximately  
1000 represent the sample sizes of published cross-sectional microbiome-metabolome  
1001 association studies (14, 16). We set the initial inflow concentrations to the amount that  
1002 would dilute in over one hour under the calculated inflow rates.

1003

#### 1004 ***Calculation of contribution values for variable metabolites***

1005 We calculated contribution values for all metabolites with variance in concentration  
1006 above the 25<sup>th</sup> percentile. We chose this threshold in order to include as many  
1007 metabolites as possible while excluding those that only varied at all in fewer than half of  
1008 the simulation runs, or whose variation would be subject to potential numerical errors.

1009

#### 1010 ***Comparison with Shapley values***

1011 We implemented an approximate Shapley value algorithm (43) as an alternative strategy  
1012 to calculate contributions for the simulated dataset. Briefly, 15,000 random orderings of  
1013 the 10 species were randomly generated. For each ordering, the variance in metabolite  
1014 activity is calculated for subsets of size 1 to 10, adding in species according to the  
1015 specified ordering. The difference in variance as a given species is added to the subset,

1016 denoting the *marginal* contribution of that species to variation, is recorded. The average  
1017 marginal contribution across all orderings for each species is then defined as its  
1018 contribution to variance.

1019

### 1020 ***Species-metabolite correlation analysis***

1021 We calculated Spearman correlations between absolute species abundances (quantified  
1022 as total biomass) and concentrations of variable metabolites. We used absolute  
1023 abundances in order to evaluate the relationships between species and metabolites under  
1024 the hypothetically best possible measurements of both data types. We also compared  
1025 correlation results using relative abundances and found very minimal differences in the  
1026 main simulation dataset: only 7 species-metabolite pairs (1.3%) are significantly  
1027 correlated using absolute abundances but not relative, and only 4 pairs (0.8%) are  
1028 correlated using relative abundances but not absolute.

1029

1030 We used a  $p$ -value threshold of 0.01 to classify “significant” associations for binary  
1031 comparisons. For interpretability, we refer to  $p$ -values not corrected for multiple  
1032 hypothesis testing, since the number of tests remained constant across nearly all of our  
1033 analyses (520 possible species-metabolite pairs). The 0.01 threshold we use to define  
1034 significantly correlated pairs is equivalent to a Benjamini-Hochberg corrected false  
1035 discovery threshold of 0.027, calculated using the R function *p.adjust* (77).

1036

### 1037 ***Logistic regression modeling of correlation outcomes***

1038 We used logistic regression models to identify factors that can be used to predict whether

1039 a non-contributing species-metabolite pair displays a significant correlation (false  
1040 positive), and whether a key contributor species-metabolite pair fails to be correlated  
1041 (false negative). We used the *glm* function in R to fit models of the log odds of whether a  
1042 non-contributing species is correlated with its corresponding metabolite (false positive or  
1043 true negative), using as predictors grouped indicator values for species and metabolite  
1044 identities. We separately fit another set of logistic regression models to predict whether a  
1045 key contributor species is correlated (true positive or false negative), with the same  
1046 predictors. Models were compared using likelihood ratio tests using the *anova* function in  
1047 R.

1048

#### 1049 ***Simulations with varied inflow quantities***

1050 We ran 8 additional sets of simulations with the same set of 61 different initial species  
1051 compositions but with varying degrees of inflow fluctuations. Specifically, the nutrient  
1052 inflow quantities were sampled independently from a normal distribution, with a mean of  
1053 the original inflow concentration and the standard deviation equal to a set percent of the  
1054 mean. The 8 levels of deviation were 0.5%, 1%, 2%, 3%, 4%, 5%, 8%, or 10%. In the  
1055 comparison of correlation results across samples, we evaluated the same set of 52  
1056 variable metabolites as for the original dataset for consistency, although given the added  
1057 noise, additional metabolites met the same variance cutoff we used to define variable  
1058 metabolites.

1059

1060 To evaluate correlation performance as a function of increasing environmental  
1061 contribution, we binned the 38 analyzed inflow metabolites across the 8 datasets based



1062 on the size of the environmental contribution to variance for the metabolite in that dataset.  
1063 In other words, metabolites in any dataset with an environmental contribution greater than  
1064 0 but less than 10% of the total positive variance contributions were binned into a single  
1065 category, those with an environmental contribution between 10% and 20% were binned  
1066 into the next category, and so on. We analyzed the 52 metabolites in the original constant-  
1067 environment dataset as a separate category, and did the same for the 14 non-inflow  
1068 metabolites in each of the 8 environmentally-varying datasets.

1069  
1070 Confidence intervals for AUC values were calculated using the *pROC* package in R (78),  
1071 using a bootstrap method with 500 resamplings.

1072

### 1073 ***Simulations of Human Microbiome Project-based microbiota***

1074 To simulate more complex gut microbiota, we downloaded the 16S rRNA sequence  
1075 variant abundance tables from the Human Microbiome Project (52), processed with  
1076 *deblur* (79), from *Qiita* (80). We also downloaded ribosomal RNA sequences for all of the  
1077 818 genomes corresponding with AGORA v1.0.2 models from NCBI RefSeq and  
1078 GenBank using the *biomartr* R package (81). We used *vsearch* version 2.8.1 (82) to map  
1079 the HMP sequences to the AGORA ribosomal sequences with 97% identity, with the  
1080 *max\_rejects* parameter set to 0 in order to obtain the highest identity match for each  
1081 sequence variant. We chose to model a subset of 57 samples for which at least 25% of  
1082 their total read counts successfully mapped to an AGORA genome. We normalized  
1083 species abundances based on the 16S rRNA copy number of the corresponding genome,  
1084 and initialized 57 simulations with the starting relative abundances determined based on

1085 the AGORA-mapped relative abundances of these samples. We updated the nutrient  
1086 inflow to enable growth by most models. We assessed whether the additional of each  
1087 individual metabolite to the original nutrient inflow had a growth-promoting effect on any  
1088 species, specifying proportions similar to the average European diet in the Virtual  
1089 Metabolic Human database where possible (83). Metabolites that promoted growth in at  
1090 least one species were retained in the revised nutrient inflow, and the process of testing  
1091 for increased growth with the addition of any single metabolite was repeated. After two  
1092 rounds of adding metabolites to the inflow, 15 models, representing 3.4% of the total  
1093 normalized abundance across all samples, still displayed zero growth. We removed these  
1094 from the simulations and used the final updated nutrient inflow with the 131 remaining  
1095 models. All other simulation parameters were the same as for the original 10-species  
1096 community simulations. When analyzing the role of interspecies correlation in this  
1097 dataset, we excluded species that appear in fewer than 4 samples.

1098

1099 ***Application of MIMOSA to simulated data and comparison with correlation***  
1100 ***analysis***

1101 We applied MIMOSA v1.0.2 ([github.com/borenstein-lab/MIMOSA](https://github.com/borenstein-lab/MIMOSA)) (57) to the obtained  
1102 set of metabolite and species abundances. To construct the community metabolic  
1103 network model required by MIMOSA, we merged the 10 species-level models used in the  
1104 simulations into a single stoichiometric matrix. If a reversible reaction only ever proceeded  
1105 in a single direction in any simulation, we encoded it as non-reversible. To apply the  
1106 KEGG-based version of MIMOSA, we converted the model metabolite IDs to KEGG IDs  
1107 (56), downloaded KEGG Orthology gene annotations for the 10 modeled species from

1108 the IMG/M database (84), and ran a MIMOSA analysis using the KEGG metabolic  
1109 network model encoded in *reaction\_mapformula.lst* (KEGG version downloaded 2-2018).

1110

1111 ***Code and data availability***

1112 Code for all the analyses presented in this study is available online in the form of R  
1113 notebooks at <https://github.com/borenstein-lab/microbiome-metabolome-evaluation>. The  
1114 code and media files for performing dynamic FBA co-culture simulations is available from  
1115 <https://borensteinlab.com/download.html>. All data generated and analyzed in this study  
1116 and displayed in the figures are included in Supplementary Data 1 through 4.

1117

1118

## 1119 **Author contributions**

1120 C.N. and E.B. designed the study and wrote the paper. C.N. performed the analysis.

1121 H.C.C. and C.P.M. contributed to the multi-species metabolic modeling simulations. All  
1122 authors read and approved the paper.

1123

## 1124 **Acknowledgements**

1125 C.N. was supported in part by a National Science Foundation (NSF) IGERT DGE-  
1126 1258485 fellowship. C.P.M. was funded by NHGRI grant T32 HG000035. This work was  
1127 supported in part by NIH New Innovator Award DP2 AT007802–01 and NIH grant  
1128 1R01GM124312–01 to E.B.

1129

## 1130 **References**

- 1131 1. Hazen TC, Dubinsky EA, DeSantis TZ, Andersen GL, Piceno YM, Singh N, Jansson  
1132 JK, Probst A, Borglin SE, Fortney JL, Stringfellow WT, Bill M, Conrad ME, Tom LM,  
1133 Chavarria KL, Alusi TR, Lamendella R, Joyner DC, Spier C, Baelum J, Auer M,  
1134 Zemla ML, Chakraborty R, Sonnenthal EL, D'haeseleer P, Holman H-YN, Osman  
1135 S, Lu Z, Van Nostrand JD, Deng Y, Zhou J, Mason OU. 2010. Deep-Sea Oil Plume  
1136 Enriches Indigenous Oil-Degrading Bacteria. *Science* 330:204–208.
- 1137 2. Shi W, Moon C, Leahy S, Kang D, Froula J, Kittelmann S, Fan C, Deutsch S, Gagic  
1138 D, Seedorf H, Kelly W, Atua R, Sang C, Soni P, Li D, Pinares-Patiño C, McEwan J,  
1139 Janssen P, Chen F, Visel A, Wang Z, Attwood G, Rubin E. 2014. Methane yield  
1140 phenotypes linked to differential gene expression in the sheep rumen microbiome.  
1141 *Genome Res* gr.168245.113.
- 1142 3. Koeth RA, Wang Z, Levison BS, Buffa JA, Org E, Sheehy BT, Britt EB, Fu X, Wu Y,  
1143 Li L, Smith JD, DiDonato JA, Chen J, Li H, Wu GD, Lewis JD, Warrier M, Brown  
1144 JM, Krauss RM, Tang WHW, Bushman FD, Lusk AJ, Hazen SL. 2013. Intestinal  
1145 microbiota metabolism of L-carnitine, a nutrient in red meat, promotes  
1146 atherosclerosis. *Nat Med* 19:576–585.
- 1147 4. Hsiao EY, McBride SW, Hsien S, Sharon G, Hyde ER, McCue T, Codelli JA, Chow  
1148 J, Reisman SE, Petrosino JF, Patterson PH, Mazmanian SK. 2013. Microbiota  
1149 Modulate Behavioral and Physiological Abnormalities Associated with  
1150 Neurodevelopmental Disorders. *Cell* 155:1451–1463.

- 1151 5. Dumas M-E, Barton RH, Toye A, Cloarec O, Blancher C, Rothwell A, Fearnside J,  
1152 Tatoud R, Blanc V, Lindon JC, Mitchell SC, Holmes E, McCarthy MI, Scott J,  
1153 Gauguier D, Nicholson JK. 2006. Metabolic profiling reveals a contribution of gut  
1154 microbiota to fatty liver phenotype in insulin-resistant mice. *Proc Natl Acad Sci*  
1155 103:12511–12516.
- 1156 6. Louis P, Hold GL, Flint HJ. 2014. The gut microbiota, bacterial metabolites and  
1157 colorectal cancer. *Nat Rev Microbiol* 12:661–672.
- 1158 7. Wlodarska M, Luo C, Kolde R, d’Hennezel E, Annand JW, Heim CE, Krastel P,  
1159 Schmitt EK, Omar AS, Creasey EA, Garner AL, Mohammadi S, O’Connell DJ,  
1160 Abubucker S, Arthur TD, Franzosa EA, Huttenhower C, Murphy LO, Haiser HJ,  
1161 Vlamakis H, Porter JA, Xavier RJ. 2017. Indoleacrylic Acid Produced by  
1162 Commensal *Peptostreptococcus* Species Suppresses Inflammation. *Cell Host*  
1163 *Microbe* 22:25-37.e6.
- 1164 8. Ferreyra JA, Wu KJ, Hryckowian AJ, Bouley DM, Weimer BC, Sonnenburg JL. 2014.  
1165 Gut Microbiota-Produced Succinate Promotes *C. difficile* Infection after Antibiotic  
1166 Treatment or Motility Disturbance. *Cell Host Microbe* 16:770–777.
- 1167 9. Rath S, Heidrich B, Pieper DH, Vital M. 2017. Uncovering the trimethylamine-  
1168 producing bacteria of the human gut microbiota. *Microbiome* 5.
- 1169 10. David LA, Maurice CF, Carmody RN, Gootenberg DB, Button JE, Wolfe BE, Ling  
1170 AV, Devlin AS, Varma Y, Fischbach MA, Biddinger SB, Dutton RJ, Turnbaugh PJ.

- 1171 2013. Diet rapidly and reproducibly alters the human gut microbiome. *Nature*  
1172 505:559–563.
- 1173 11. De Filippis F, Pellegrini N, Vannini L, Jeffery IB, La Stora A, Laghi L, Serrazanetti  
1174 DI, Di Cagno R, Ferrocino I, Lazzi C, Turrone S, Cocolin L, Brigidi P, Neviani E,  
1175 Gobbetti M, O’Toole PW, Ercolini D. 2015. High-level adherence to a  
1176 Mediterranean diet beneficially impacts the gut microbiota and associated  
1177 metabolome. *Gut* gutjnl-2015-309957.
- 1178 12. Snijders AM, Langley SA, Kim Y-M, Brislawn CJ, Noecker C, Zink EM, Fansler SJ,  
1179 Casey CP, Miller DR, Huang Y, Karpen GH, Celniker SE, Brown JB, Borenstein E,  
1180 Jansson JK, Metz TO, Mao J-H. 2016. Influence of early life exposure, host  
1181 genetics and diet on the mouse gut microbiome and metabolome. *Nat Microbiol*  
1182 2:16221.
- 1183 13. Shaffer M, Armstrong AJS, Phelan VV, Reisdorph N, Lozupone CA. 2017.  
1184 Microbiome and metabolome data integration provides insight into health and  
1185 disease. *Transl Res*.
- 1186 14. Srinivasan S, Morgan MT, Fiedler TL, Djukovic D, Hoffman NG, Raftery D,  
1187 Marrazzo JM, Fredricks DN. 2015. Metabolic Signatures of Bacterial Vaginosis.  
1188 *mBio* 6:e00204-15.
- 1189 15. Theriot CM, Koenigsnecht MJ, Carlson Jr PE, Hatton GE, Nelson AM, Li B,  
1190 Huffnagle GB, Z. Li J, Young VB. 2014. Antibiotic-induced shifts in the mouse gut

- 1191 microbiome and metabolome increase susceptibility to *Clostridium difficile*  
1192 infection. *Nat Commun* 5.
- 1193 16. Califf KJ, Schwarzberg-Lipson K, Garg N, Gibbons SM, Caporaso JG, Slots J,  
1194 Cohen C, Dorrestein PC, Kelley ST. 2017. Multi-omics Analysis of Periodontal  
1195 Pocket Microbial Communities Pre- and Posttreatment. *mSystems* 2:e00016-17.
- 1196 17. Garg N, Wang M, Hyde E, da Silva RR, Melnik AV, Protsyuk I, Bouslimani A, Lim  
1197 YW, Wong R, Humphrey G, Ackermann G, Spivey T, Brouha SS, Bandeira N, Lin  
1198 GY, Rohwer F, Conrad DJ, Alexandrov T, Knight R, Dorrestein PC. 2017. Three-  
1199 Dimensional Microbiome and Metabolome Cartography of a Diseased Human  
1200 Lung. *Cell Host Microbe*.
- 1201 18. Antharam VC, McEwen DC, Garrett TJ, Dossey AT, Li EC, Kozlov AN, Mesbah Z,  
1202 Wang GP. 2016. An Integrated Metabolomic and Microbiome Analysis Identified  
1203 Specific Gut Microbiota Associated with Fecal Cholesterol and Coprostanol in  
1204 *Clostridium difficile* Infection. *PLoS ONE* 11:e0148824.
- 1205 19. Heintz-Buschart A, May P, Laczny CC, Lebrun LA, Bellora C, Krishna A, Wampach  
1206 L, Schneider JG, Hogan A, de Beaufort C, Wilmes P. 2016. Integrated multi-omics  
1207 of the human gut microbiome in a case study of familial type 1 diabetes. *Nat*  
1208 *Microbiol* 2:16180.
- 1209 20. Hua C, Tian J, Tian P, Cong R, Luo Y, Geng Y, Tao S, Ni Y, Zhao R. 2017.  
1210 Feeding a High Concentration Diet Induces Unhealthy Alterations in the



- 1211           Composition and Metabolism of Ruminal Microbiota and Host Response in a Goat  
1212           Model. *Front Microbiol* 8.
- 1213   21. Price ND, Magis AT, Earls JC, Glusman G, Levy R, Lausted C, McDonald DT,  
1214           Kusebauch U, Moss CL, Zhou Y, Qin S, Moritz RL, Brogaard K, Omenn GS,  
1215           Lovejoy JC, Hood L. 2017. A wellness study of 108 individuals using personal,  
1216           dense, dynamic data clouds. *Nat Biotechnol*.
- 1217   22. Vandeputte D, Falony G, Vieira-Silva S, Wang J, Sailer M, Theis S, Verbeke K,  
1218           Raes J. 2017. Prebiotic inulin-type fructans induce specific changes in the human  
1219           gut microbiota. *Gut* 66:1968–1974.
- 1220   23. Walsh AM, Crispie F, Kilcawley K, O’Sullivan O, O’Sullivan MG, Claesson MJ,  
1221           Cotter PD. 2016. Microbial Succession and Flavor Production in the Fermented  
1222           Dairy Beverage Kefir. *mSystems* 1:e00052-16.
- 1223   24. Weir TL, Manter DK, Sheflin AM, Barnett BA, Heuberger AL, Ryan EP. 2013. Stool  
1224           Microbiome and Metabolome Differences between Colorectal Cancer Patients and  
1225           Healthy Adults. *PLoS ONE* 8:e70803.
- 1226   25. Alivisatos AP, Blaser MJ, Brodie EL, Chun M, Dangl JL, Donohue TJ, Dorrestein  
1227           PC, Gilbert JA, Green JL, Jansson JK, Knight R, Maxon ME, McFall-Ngai MJ, Miller  
1228           JF, Pollard KS, Ruby EG, Taha SA, Unified Microbiome Initiative Consortium.  
1229           2015. A unified initiative to harness Earth’s microbiomes. *Science* 350:507–508.

- 1230 26. iHMP Research Network Consortium. 2014. The Integrative Human Microbiome  
1231 Project: Dynamic Analysis of Microbiome-Host Omics Profiles during Periods of  
1232 Human Health and Disease. *Cell Host Microbe* 16:276–289.
- 1233 27. Choo JM, Kanno T, Zain NMM, Leong LEX, Abell GCJ, Keeble JE, Bruce KD,  
1234 Mason AJ, Rogers GB. 2017. Divergent Relationships between Fecal Microbiota  
1235 and Metabolome following Distinct Antibiotic-Induced Disruptions. *mSphere*  
1236 2:e00005-17.
- 1237 28. Kang D-W, Ilhan ZE, Isern NG, Hoyt DW, Howsmon DP, Shaffer M, Lozupone CA,  
1238 Hahn J, Adams JB, Krajmalnik-Brown R. 2018. Differences in fecal microbial  
1239 metabolites and microbiota of children with autism spectrum disorders. *Anaerobe*  
1240 49:121–131.
- 1241 29. Lin Z, Ye W, Zu X, Xie H, Li H, Li Y, Zhang W. 2018. Integrative metabolic and  
1242 microbial profiling on patients with Spleen-yang-deficiency syndrome. *Sci Rep* 8.
- 1243 30. Melnik AV, da Silva RR, Hyde ER, Aksenov AA, Vargas F, Bouslimani A, Protsyuk  
1244 I, Jarmusch AK, Tripathi A, Alexandrov T, Knight R, Dorrestein PC. 2017. Coupling  
1245 Targeted and Untargeted Mass Spectrometry for Metabolome-Microbiome-Wide  
1246 Association Studies of Human Fecal Samples. *Anal Chem* 89:7549–7559.
- 1247 31. Chong J, Xia J. 2017. Computational Approaches for Integrative Analysis of the  
1248 Metabolome and Microbiome. *Metabolites* 7:62.
- 1249 32. Hoyles L, Jiménez-Pranteda ML, Chilloux J, Brial F, Myridakis A, Aranas T,  
1250 Magnan C, Gibson GR, Sanderson JD, Nicholson JK, Gauguier D, McCartney AL,

- 1251 Dumas M-E. 2018. Metabolic retroconversion of trimethylamine N-oxide and the  
1252 gut microbiota. *Microbiome* 6.
- 1253 33. Weiss S, Van Treuren W, Lozupone C, Faust K, Friedman J, Deng Y, Xia LC, Xu  
1254 ZZ, Ursell L, Alm EJ, Birmingham A, Cram JA, Fuhrman JA, Raes J, Sun F, Zhou  
1255 J, Knight R. 2016. Correlation detection strategies in microbial data sets vary  
1256 widely in sensitivity and precision. *ISME J* 10:1669–1681.
- 1257 34. Werhli AV, Grzegorzczak M, Husmeier D. 2006. Comparative evaluation of reverse  
1258 engineering gene regulatory networks with relevance networks, graphical gaussian  
1259 models and bayesian networks. *Bioinformatics* 22:2523–2531.
- 1260 35. Biggs MB, Medlock GL, Moutinho TJ, Lees HJ, Swann JR, Kolling GL, Papin JA.  
1261 2016. Systems-level metabolism of the altered Schaedler flora, a complete gut  
1262 microbiota. *ISME J*.
- 1263 36. Kešnerová L, Mars RAT, Ellegaard KM, Troilo M, Sauer U, Engel P. 2017.  
1264 Disentangling metabolic functions of bacteria in the honey bee gut. *PLOS Biol*  
1265 15:e2003467.
- 1266 37. Bauer E, Zimmermann J, Baldini F, Thiele I, Kaleta C. 2017. BacArena: Individual-  
1267 based metabolic modeling of heterogeneous microbes in complex communities.  
1268 *PLOS Comput Biol* 13:e1005544.
- 1269 38. Garza DR, van Verk MC, Huynen MA, Dutilh BE. 2018. Towards predicting the  
1270 environmental metabolome from metagenomics with a mechanistic model. *Nat*  
1271 *Microbiol*.

- 1272 39. Heinken A, Thiele I. 2015. Anoxic conditions promote species-specific mutualism  
1273 between gut microbes in silico. *Appl Environ Microbiol* AEM.00101-15.
- 1274 40. Magnúsdóttir S, Heinken A, Kutt L, Ravcheev DA, Bauer E, Noronha A,  
1275 Greenhalgh K, Jäger C, Baginska J, Wilmes P, Fleming RMT, Thiele I. 2016.  
1276 Generation of genome-scale metabolic reconstructions for 773 members of the  
1277 human gut microbiota. *Nat Biotechnol*.
- 1278 41. Shoaie S, Ghaffari P, Kovatcheva-Datchary P, Mardinoglu A, Sen P, Pujos-Guillot  
1279 E, de Wouters T, Juste C, Rizkalla S, Chilloux J, Hoyles L, Nicholson JK, Dore J,  
1280 Dumas ME, Clement K, Bäckhed F, Nielsen J. 2015. Quantifying Diet-Induced  
1281 Metabolic Changes of the Human Gut Microbiome. *Cell Metab* 22:320–331.
- 1282 42. Shapley LS. 1953. 17. A Value for n-Person Games, p. . *In* Kuhn, HW, Tucker, AW  
1283 (eds.), *Contributions to the Theory of Games (AM-28)*, Volume II. Princeton  
1284 University Press, Princeton.
- 1285 43. Manor O, Borenstein E. 2017. Systematic Characterization and Analysis of the  
1286 Taxonomic Drivers of Functional Shifts in the Human Microbiome. *Cell Host*  
1287 *Microbe* 21:254–267.
- 1288 44. Chiu H-C, Levy R, Borenstein E. 2014. Emergent Biosynthetic Capacity in Simple  
1289 Microbial Communities. *PLoS Comput Biol* 10:e1003695.
- 1290 45. Manor O, Levy R, Borenstein E. 2014. Mapping the Inner Workings of the  
1291 Microbiome: Genomic- and Metagenomic-Based Study of Metabolism and  
1292 Metabolic Interactions in the Human Microbiome. *Cell Metab* 20:742–752.

- 1293 46. Varma A, Palsson BO. 1994. Metabolic Flux Balancing: Basic Concepts, Scientific  
1294 and Practical Use. *Bio/Technology* 12:994–998.
- 1295 47. Faith JJ, McNulty NP, Rey FE, Gordon JI. 2011. Predicting a Human Gut  
1296 Microbiota's Response to Diet in Gnotobiotic Mice. *Science* 333:101–104.
- 1297 48. Rivière A, Gagnon M, Weckx S, Roy D, De Vuyst L. 2015. Mutual Cross-Feeding  
1298 Interactions between *Bifidobacterium longum* subsp. *longum* NCC2705 and  
1299 *Eubacterium rectale* ATCC 33656 Explain the Bifidogenic and Butyrogenic Effects  
1300 of Arabinoxylan Oligosaccharides. *Appl Environ Microbiol* 81:7767–7781.
- 1301 49. Unterseher M, Jumpponen A, öPik M, Tedersoo L, Moora M, Dormann CF,  
1302 Schnittler M. 2011. Species abundance distributions and richness estimations in  
1303 fungal metagenomics - lessons learned from community ecology: COMMUNITY  
1304 ECOLOGY IN FUNGAL METAGENOMICS. *Mol Ecol* 20:275–285.
- 1305 50. Mee MT, Collins JJ, Church GM, Wang HH. 2014. Syntrophic exchange in  
1306 synthetic microbial communities. *Proc Natl Acad Sci* 111:E2149–E2156.
- 1307 51. McHardy IH, Goudarzi M, Tong M, Ruegger PM, Schwager E, Weger JR, Graeber  
1308 TG, Sonnenburg JL, Horvath S, Huttenhower C, McGovern DP, Fornace AJ,  
1309 Borneman J. 2013. Integrative analysis of the microbiome and metabolome of the  
1310 human intestinal mucosal surface reveals exquisite inter-relationships. *Microbiome*  
1311 1:17.
- 1312 52. Huttenhower C, Gevers D, Knight R, Abubucker S, Badger JH, Chinwalla AT,  
1313 Creasy HH, Earl AM, FitzGerald MG, Fulton RS, Giglio MG, Hallsworth-Pepin K,

1314 Lobos EA, Madupu R, Magrini V, Martin JC, Mitreva M, Muzny DM, Sodergren EJ,  
1315 Versalovic J, Wollam AM, Worley KC, Wortman JR, Young SK, Zeng Q, Aagaard  
1316 KM, Abolude OO, Allen-Vercoe E, Alm EJ, Alvarado L, Andersen GL, Anderson S,  
1317 Appelbaum E, Arachchi HM, Armitage G, Arze CA, Ayvaz T, Baker CC, Begg L,  
1318 Belachew T, Bhonagiri V, Bihan M, Blaser MJ, Bloom T, Bonazzi V, Paul Brooks J,  
1319 Buck GA, Buhay CJ, Busam DA, Campbell JL, Canon SR, Cantarel BL, Chain  
1320 PSG, Chen I-MA, Chen L, Chhibba S, Chu K, Ciulla DM, Clemente JC, Clifton SW,  
1321 Conlan S, Crabtree J, Cutting MA, Davidovics NJ, Davis CC, DeSantis TZ, Deal C,  
1322 Delehaunty KD, Dewhirst FE, Deych E, Ding Y, Dooling DJ, Dugan SP, Michael  
1323 Dunne W, Scott Durkin A, Edgar RC, Erlich RL, Farmer CN, Farrell RM, Faust K,  
1324 Feldgarden M, Felix VM, Fisher S, Fodor AA, Forney LJ, Foster L, Di Francesco V,  
1325 Friedman J, Friedrich DC, Fronick CC, Fulton LL, Gao H, Garcia N, Giannoukos G,  
1326 Giblin C, Giovanni MY, Goldberg JM, Goll J, Gonzalez A, Griggs A, Gujja S, Kinder  
1327 Haake S, Haas BJ, Hamilton HA, Harris EL, Hepburn TA, Herter B, Hoffmann DE,  
1328 Holder ME, Howarth C, Huang KH, Huse SM, Izard J, Jansson JK, Jiang H, Jordan  
1329 C, Joshi V, Katancik JA, Keitel WA, Kelley ST, Kells C, King NB, Knights D, Kong  
1330 HH, Koren O, Koren S, Kota KC, Kovar CL, Kyrpides NC, La Rosa PS, Lee SL,  
1331 Lemon KP, Lennon N, Lewis CM, Lewis L, Ley RE, Li K, Liolios K, Liu B, Liu Y, Lo  
1332 C-C, Lozupone CA, Dwayne Lunsford R, Madden T, Mahurkar AA, Mannon PJ,  
1333 Mardis ER, Markowitz VM, Mavromatis K, McCorrison JM, McDonald D, McEwen  
1334 J, McGuire AL, McInnes P, Mehta T, Mihindukulasuriya KA, Miller JR, Minx PJ,  
1335 Newsham I, Nusbaum C, O’Laughlin M, Orvis J, Pagani I, Palaniappan K, Patel  
1336 SM, Pearson M, Peterson J, Podar M, Pohl C, Pollard KS, Pop M, Priest ME,

- 1337 Proctor LM, Qin X, Raes J, Ravel J, Reid JG, Rho M, Rhodes R, Riehle KP, Rivera  
1338 MC, Rodriguez-Mueller B, Rogers Y-H, Ross MC, Russ C, Sanka RK, Sankar P,  
1339 Fah Sathirapongsasuti J, Schloss JA, Schloss PD, Schmidt TM, Scholz M, Schriml  
1340 L, Schubert AM, Segata N, Segre JA, Shannon WD, Sharp RR, Sharpton TJ,  
1341 Shenoy N, Sheth NU, Simone GA, Singh I, Smillie CS, Sobel JD, Sommer DD,  
1342 Spicer P, Sutton GG, Sykes SM, Tabbaa DG, Thiagarajan M, Tomlinson CM,  
1343 Torralba M, Treangen TJ, Truty RM, Vishnivetskaya TA, Walker J, Wang L, Wang  
1344 Z, Ward DV, Warren W, Watson MA, Wellington C, Wetterstrand KA, White JR,  
1345 Wilczek-Boney K, Wu Y, Wylie KM, Wylie T, Yandava C, Ye L, Ye Y, Yooseph S,  
1346 Youmans BP, Zhang L, Zhou Y, Zhu Y, Zoloth L, Zucker JD, Birren BW, Gibbs RA,  
1347 Highlander SK, Methé BA, Nelson KE, Petrosino JF, Weinstock GM, Wilson RK,  
1348 White O. 2012. Structure, function and diversity of the healthy human microbiome.  
1349 Nature 486:207–214.
- 1350 53. Gilbert JA, Quinn RA, Debelius J, Xu ZZ, Morton J, Garg N, Jansson JK, Dorrestein  
1351 PC, Knight R. 2016. Microbiome-wide association studies link dynamic microbial  
1352 consortia to disease. Nature 535:94–103.
- 1353 54. Langille MGI, Zaneveld J, Caporaso JG, McDonald D, Knights D, Reyes JA,  
1354 Clemente JC, Burkepille DE, Vega Thurber RL, Knight R, Beiko RG, Huttenhower  
1355 C. 2013. Predictive functional profiling of microbial communities using 16S rRNA  
1356 marker gene sequences. Nat Biotechnol 31:814–821.
- 1357 55. Caspi R, Altman T, Billington R, Dreher K, Foerster H, Fulcher CA, Holland TA,  
1358 Keseler IM, Kothari A, Kubo A, Krummenacker M, Latendresse M, Mueller LA, Ong

- 1359 Q, Paley S, Subhraveti P, Weaver DS, Weerasinghe D, Zhang P, Karp PD. 2014.  
1360 The MetaCyc database of metabolic pathways and enzymes and the BioCyc  
1361 collection of Pathway/Genome Databases. *Nucleic Acids Res* 42:D459–D471.
- 1362 56. Kanehisa M, Goto S. 2000. KEGG: kyoto encyclopedia of genes and genomes.  
1363 *Nucleic Acids Res* 28:27–30.
- 1364 57. Noecker C, Eng A, Srinivasan S, Theriot CM, Young VB, Jansson JK, Fredricks  
1365 DN, Borenstein E. 2016. Metabolic Model-Based Integration of Microbiome  
1366 Taxonomic and Metabolomic Profiles Elucidates Mechanistic Links between  
1367 Ecological and Metabolic Variation. *mSystems* 1:e00013-15.
- 1368 58. Casero D, Gill K, Sridharan V, Koturbash I, Nelson G, Hauer-Jensen M, Boerma M,  
1369 Braun J, Cheema AK. 2017. Space-type radiation induces multimodal responses in  
1370 the mouse gut microbiome and metabolome. *Microbiome* 5.
- 1371 59. Stewart CJ, Mansbach JM, Wong MC, Ajami NJ, Petrosino JF, Camargo CA,  
1372 Hasegawa K. 2017. Associations of Nasopharyngeal Metabolome and Microbiome  
1373 with Severity among Infants with Bronchiolitis. A Multiomic Analysis. *Am J Respir*  
1374 *Crit Care Med* 196:882–891.
- 1375 60. Franzosa EA, Morgan XC, Segata N, Waldron L, Reyes J, Earl AM, Giannoukos G,  
1376 Boylan MR, Ciulla D, Gevers D, Izard J, Garrett WS, Chan AT, Huttenhower C.  
1377 2014. Relating the metatranscriptome and metagenome of the human gut. *Proc*  
1378 *Natl Acad Sci* 111:E2329–E2338.



- 1379 61. Iwai S, Weinmaier T, Schmidt BL, Albertson DG, Poloso NJ, Dabbagh K, DeSantis  
1380 TZ. 2016. Piphillin: Improved Prediction of Metagenomic Content by Direct  
1381 Inference from Human Microbiomes. PLOS ONE 11:e0166104.
- 1382 62. Magnúsdóttir S, Thiele I. 2018. Modeling metabolism of the human gut microbiome.  
1383 Curr Opin Biotechnol 51:90–96.
- 1384 63. Doledec S, Chessel D. 1994. Co-inertia analysis: an alternative method for  
1385 studying species-environment relationships. Freshw Biol 31:277–294.
- 1386 64. Randolph TW, Zhao S, Copeland W, Hullar M, Shojaie A. 2015. Kernel-Penalized  
1387 Regression for Analysis of Microbiome Data. ArXiv151100297 Stat.
- 1388 65. Zhu J, Sova P, Xu Q, Dombek KM, Xu EY, Vu H, Tu Z, Brem RB, Bumgarner RE,  
1389 Schadt EE. 2012. Stitching together Multiple Data Dimensions Reveals Interacting  
1390 Metabolomic and Transcriptomic Networks That Modulate Cell Regulation. PLoS  
1391 Biol 10:e1001301.
- 1392 66. Keren N, Konikoff FM, Paitan Y, Gabay G, Reshef L, Naftali T, Gophna U. 2015.  
1393 Interactions between the intestinal microbiota and bile acids in gallstones patients:  
1394 Bile acid and microbiota in gallstones patients. Environ Microbiol Rep 7:874–880.
- 1395 67. Berry D, Stecher B, Schintlmeister A, Reichert J, Brugiroux S, Wild B, Wanek W,  
1396 Richter A, Rauch I, Decker T, Loy A, Wagner M. 2013. Host-compound foraging by  
1397 intestinal microbiota revealed by single-cell stable isotope probing. Proc Natl Acad  
1398 Sci 110:4720–4725.

- 1399 68. Kurczy ME, Forsberg EM, Thorgersen MP, Poole FL, Benton HP, Ivanisevic J, Tran  
1400 ML, Wall JD, Elias DA, Adams MWW, Siuzdak G. 2016. Global Isotope  
1401 Metabolomics Reveals Adaptive Strategies for Nitrogen Assimilation. *ACS Chem*  
1402 *Biol* 11:1677–1685.
- 1403 69. Turnbaugh PJ, Gordon JI. 2008. An Invitation to the Marriage of Metagenomics and  
1404 Metabolomics. *Cell* 134:708–713.
- 1405 70. Collins WD, Bitz CM, Blackmon ML, Bonan GB, Bretherton CS, Carton JA, Chang  
1406 P, Doney SC, Hack JJ, Henderson TB, Kiehl JT, Large WG, McKenna DS, Santer  
1407 BD, Smith RD. 2006. The Community Climate System Model Version 3 (CCSM3). *J*  
1408 *Clim* 19:2122–2143.
- 1409 71. Connolly AJ, Angeli GZ, Chandrasekharan S, Claver CF, Cook K, Ivezic Z, Jones  
1410 RL, Krughoff KS, Peng E-H, Peterson J, Petry C, Rasmussen AP, Ridgway ST,  
1411 Saha A, Sembroski G, vanderPlas J, Yoachim P. 2014. An end-to-end simulation  
1412 framework for the Large Synoptic Survey Telescope, p. 915014. *In* Angeli, GZ,  
1413 Dierickx, P (eds.), .
- 1414 72. McNally CP, Borenstein E. 2018. Metabolic model-based analysis of the  
1415 emergence of bacterial cross-feeding via extensive gene loss. *BMC Syst Biol* 12.
- 1416 73. Schellenberger J, Que R, Fleming RMT, Thiele I, Orth JD, Feist AM, Zielinski DC,  
1417 Bordbar A, Lewis NE, Rahmanian S, Kang J, Hyduke DR, Palsson BØ. 2011.  
1418 Quantitative prediction of cellular metabolism with constraint-based models: the  
1419 COBRA Toolbox v2.0. *Nat Protoc* 6:1290–1307.

- 1420 74. Casteleyn C, Rekecki A, Van der Aa A, Simoens P, Van den Broeck W. 2010.  
1421 Surface area assessment of the murine intestinal tract as a prerequisite for oral  
1422 dose translation from mouse to man. *Lab Anim* 44:176–183.
- 1423 75. Holzhütter H-G. 2004. The principle of flux minimization and its application to  
1424 estimate stationary fluxes in metabolic networks: Flux minimization. *Eur J Biochem*  
1425 271:2905–2922.
- 1426 76. McNulty NP, Wu M, Erickson AR, Pan C, Erickson BK, Martens EC, Pudlo N a,  
1427 Muegge BD, Henrissat B, Hettich RL, Gordon JI. 2013. Effects of diet on resource  
1428 utilization by a model human gut microbiota containing *Bacteroides cellulosilyticus*  
1429 WH2, a symbiont with an extensive glycobiome. *PLoS Biol* 11:e1001637.
- 1430 77. Benjamini Y, Hochberg Y. 1995. Controlling the False Discovery Rate: A Practical  
1431 and Powerful Approach to Multiple Testing. *J R Stat Soc Ser B Methodol* 57:289–  
1432 300.
- 1433 78. Robin X, Turck N, Hainard A, Tiberti N, Lisacek F, Sanchez J-C, Müller M. 2011.  
1434 pROC: an open-source package for R and S+ to analyze and compare ROC  
1435 curves. *BMC Bioinformatics* 12:77.
- 1436 79. Amir A, McDonald D, Navas-Molina JA, Kopylova E, Morton JT, Zech Xu Z,  
1437 Kightley EP, Thompson LR, Hyde ER, Gonzalez A, Knight R. 2017. Deblur Rapidly  
1438 Resolves Single-Nucleotide Community Sequence Patterns. *mSystems* 2:e00191-  
1439 16.

- 1440 80. Gonzalez A, Navas-Molina JA, Kosciolk T, McDonald D, Vázquez-Baeza Y,  
1441 Ackermann G, DeReus J, Janssen S, Swafford AD, Orchanian SB, Sanders JG,  
1442 Shorenstein J, Holste H, Petrus S, Robbins-Pianka A, Brislawn CJ, Wang M,  
1443 Rideout JR, Bolyen E, Dillon M, Caporaso JG, Dorrestein PC, Knight R. 2018.  
1444 Qiita: rapid, web-enabled microbiome meta-analysis. *Nat Methods* 15:796–798.
- 1445 81. Drost H-G, Paszkowski J. 2017. Biomart: genomic data retrieval with R.  
1446 *Bioinformatics* btw821.
- 1447 82. Rognes T, Flouri T, Nichols B, Quince C, Mahé F. 2016. VSEARCH: a versatile  
1448 open source tool for metagenomics. *PeerJ* 4:e2584.
- 1449 83. Noronha A, Modamio J, Jarosz Y, Guerard E, Sompairac N, Preciat G,  
1450 Daníelsdóttir AD, Krecke M, Merten D, Haraldsdóttir HS, Heinken A, Heirendt L,  
1451 Magnúsdóttir S, Ravcheev DA, Sahoo S, Gawron P, Friscioni L, Garcia B,  
1452 Prendergast M, Puente A, Rodrigues M, Roy A, Rouquaya M, Wiltgen L, Žagare A,  
1453 John E, Krueger M, Kuperstein I, Zinovyev A, Schneider R, Fleming RMT, Thiele I.  
1454 2018. The Virtual Metabolic Human database: integrating human and gut  
1455 microbiome metabolism with nutrition and disease. *Nucleic Acids Res* gky992–  
1456 gky992.
- 1457 84. Markowitz VM, Chen I-MA, Palaniappan K, Chu K, Szeto E, Grechkin Y, Ratner A,  
1458 Jacob B, Huang J, Williams P, Huntemann M, Anderson I, Mavromatis K, Ivanova  
1459 NN, Kyrpides NC. 2012. IMG: the integrated microbial genomes database and  
1460 comparative analysis system. *Nucleic Acids Res* 40:D115–D122.

1  
2

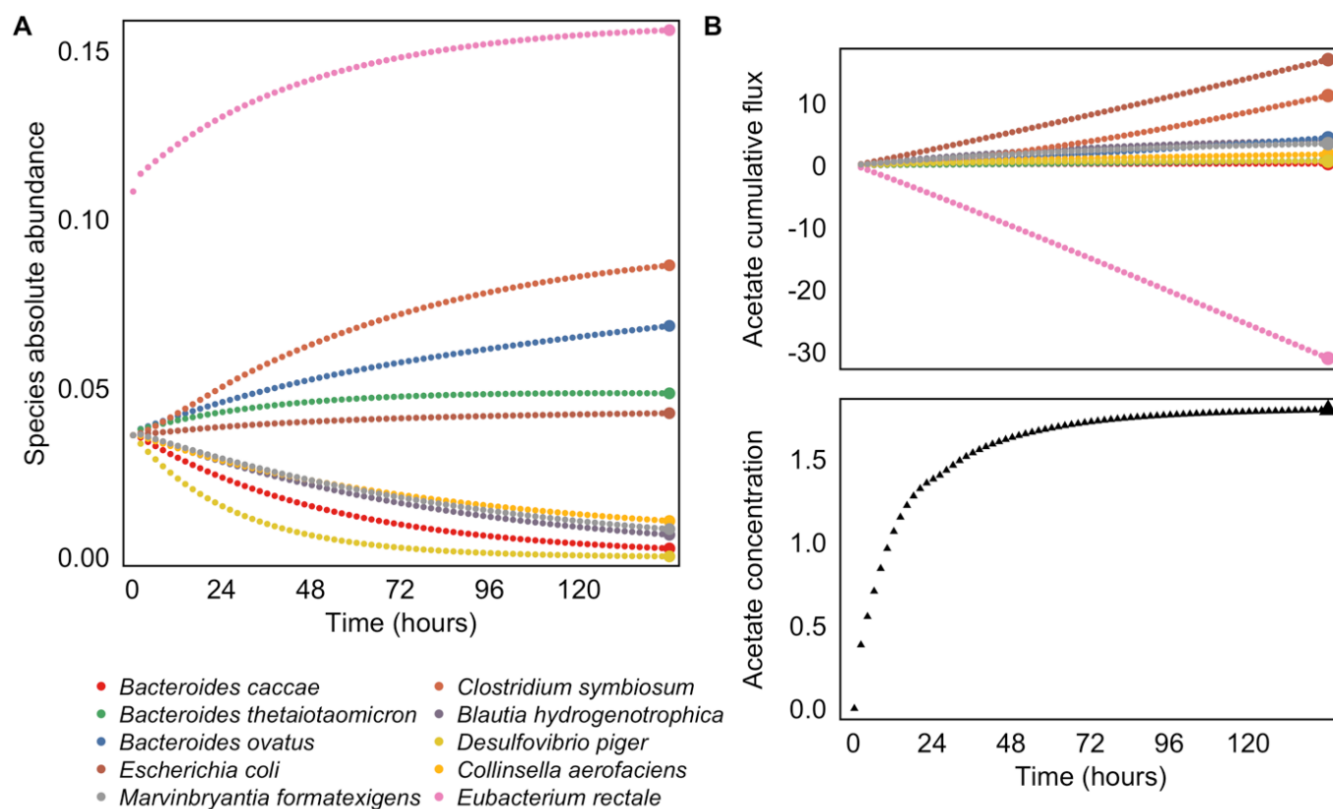

**Figure 1. Simulating multi-omic data with a dynamic multi-species genome-scale framework. (A)**

Community species abundances throughout a single simulation run. Abundances were quantified in units of microbial biomass. In this simulation, community composition was initialized with a high relative abundance of *Eubacterium rectale*. For visual clarity, only every eighth time step is illustrated. Species abundances at the final time point (highlighted with larger colored circles) were used for calculating species-metabolite correlations. **(B)** Cumulative secretion and uptake of acetate by each community member, throughout the same simulation run illustrated in panel A. Acetate was synthesized by several species and consumed by *E. rectale* over the course of the simulation. Total cumulative fluxes (highlighted with larger colored circles) were used for calculating species contributions to metabolite variation. The bottom plot illustrates the resulting environmental concentration of acetate at each time point. The metabolite concentration at the final time point (highlighted with a larger black triangle) was used for calculating species-metabolite correlations.

3

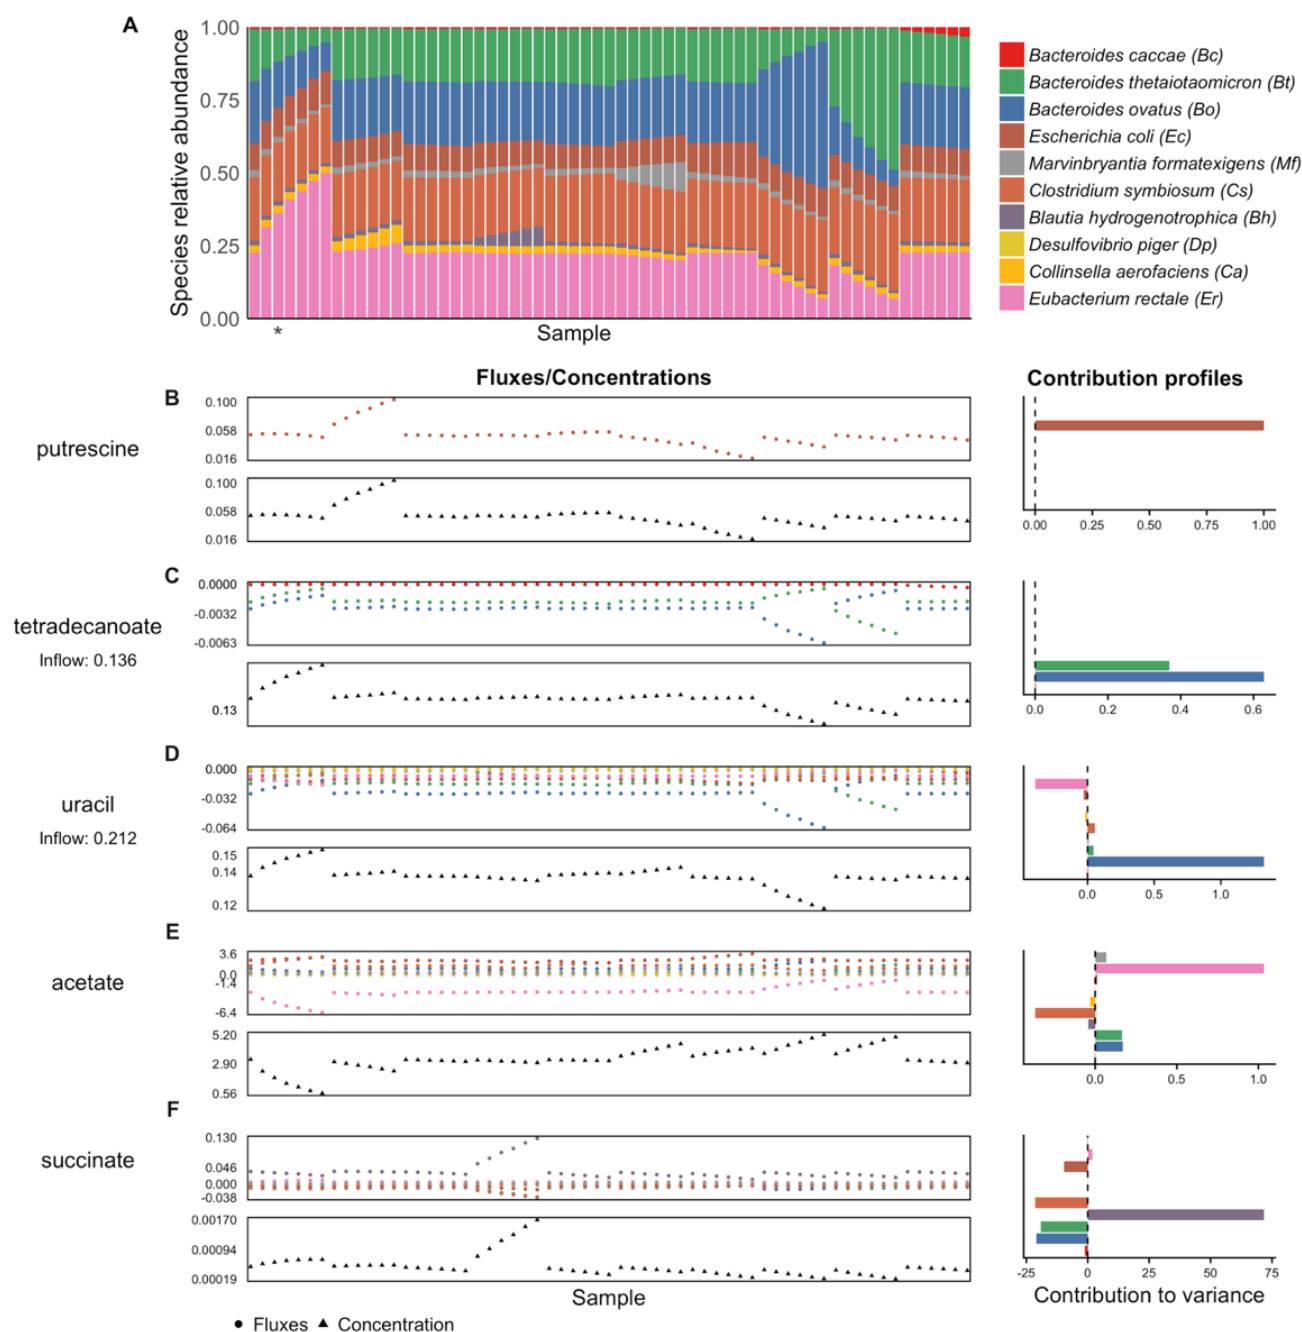

**Figure 2. Species abundances, cumulative fluxes, and contributions to variance in metabolite concentrations in our simulated dataset.** (A) The dataset of species abundances at the final time point of 61 simulation runs. Each bar represents a simulation run, with the colors indicating relative abundance of each species. The abundance profile from the simulation runs highlighted in Figure 1 is indicated with an asterisk. (B-F) For five example metabolites, the upper plot shows the total cumulative secretion or uptake of that metabolite by each species across all 61 simulation runs (or samples). The lower plot shows the corresponding environmental concentration at the final time point. The bar plot on the right shows the contribution values for each species and metabolite, calculated from the flux values and describing each species' linear contribution to the overall metabolite variance.

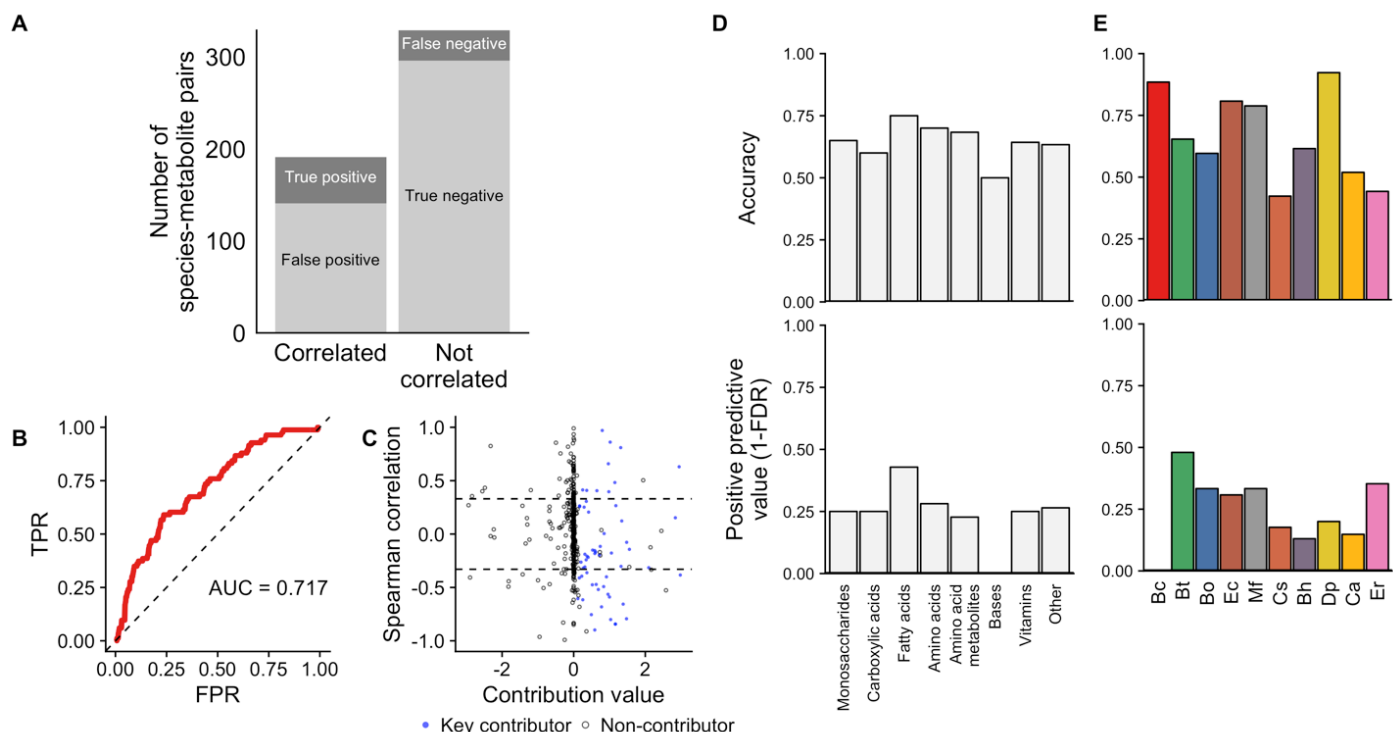

**Figure 3. Species-metabolite correlations poorly predict species contributions to metabolite variation. (A)** The number of species-metabolites pairs that were significantly correlated (left bar) or not-correlated (right bar) and its correspondence with true species-metabolite key contributors (indicated by shade of gray). **(B)** Receiver operating characteristic (ROC) plot, showing the ability of absolute Spearman correlation values to classify key contributors among all species-metabolite pairs. **(C)** Scatter plot of species-metabolite pairs, showing the poor correspondence between true contribution values (x-axis) and Spearman correlation (y-axis). Key contributors are plotted as blue points, others as hollow circles. Dashed lines show significant correlations ( $p < 0.01$ ). There are 65 species-metabolite pairs with a contribution value greater than 3 in magnitude whose values are not shown. **(D-E)** Accuracy and positive predictive value of Spearman correlation analysis for detecting true key contributors across metabolite classes (Panel D) and for each of the 10 species (Panel E).

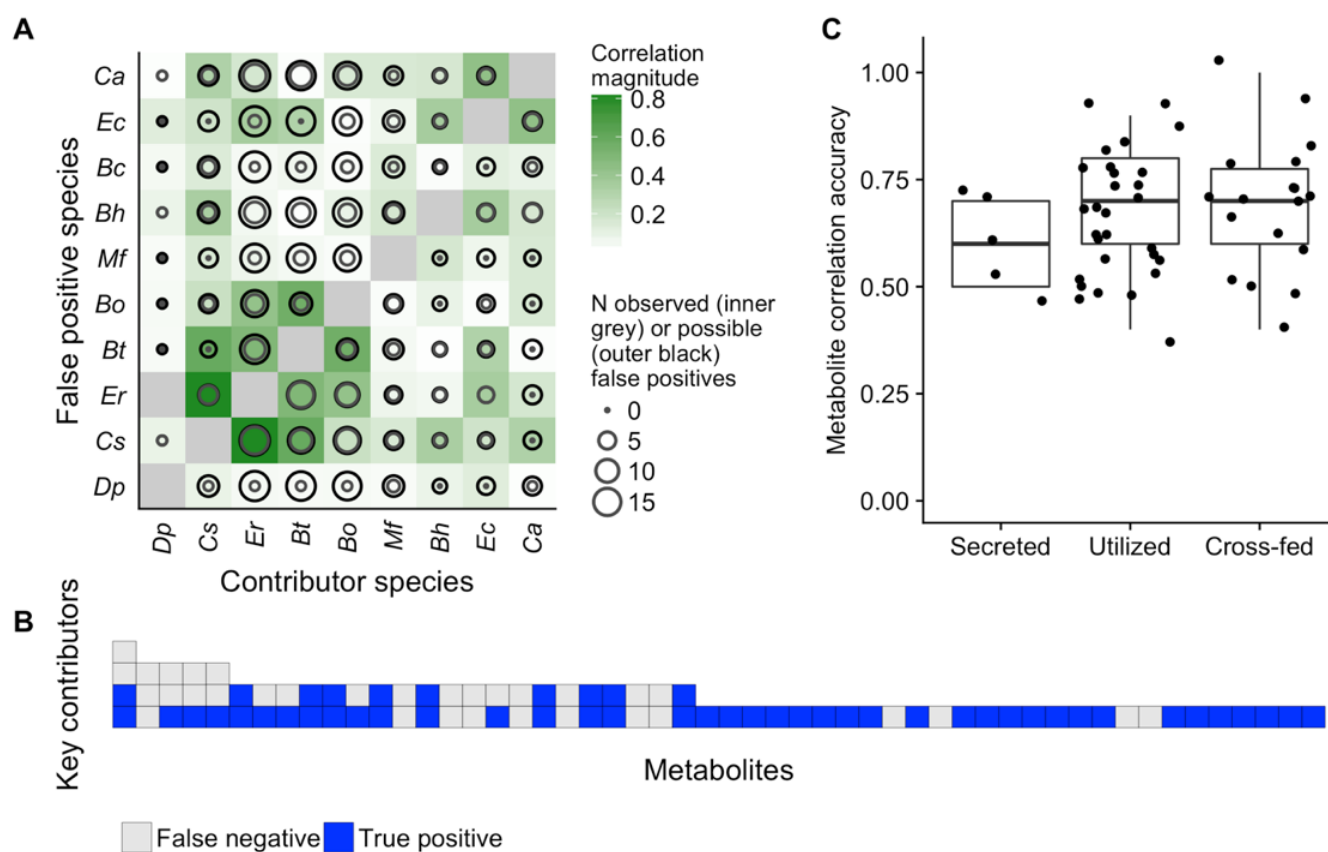

**Figure 4. Metabolite and species properties explain correlation-contribution discrepancies. (A)** Strongly correlated species pairs produced more false positive metabolite correlations. In this plot, the color of each tile indicates the strength of correlation in the abundances of each pair of species. The size of the outer black circle in each cell represents the number of metabolites for which the species on the x-axis is a key contributor and the species on the y-axis is not. The size of the inner circle represents the share of those metabolites for which a false positive is observed for the species on the y-axis. It can be seen that many false positive correlations involve the taxa with the strongest interspecies associations: *E. rectale*, *B. ovatus*, and *B. thetaiotaomicron*. **(B)** Metabolites with more microbial key contributors were more prone to false negative correlations. Each column represents an analyzed metabolite, ordered by its number of key microbial contributors, which are represented by each tile. The tiles are coded by the correlation outcome for each contributor. **(C)** Correlations detected key contributors equally accurately regardless of whether a metabolite is secreted, utilized, or cross-fed by the species. Each point represents the accuracy of correlations for a single metabolite across its comparisons with all 10 species.



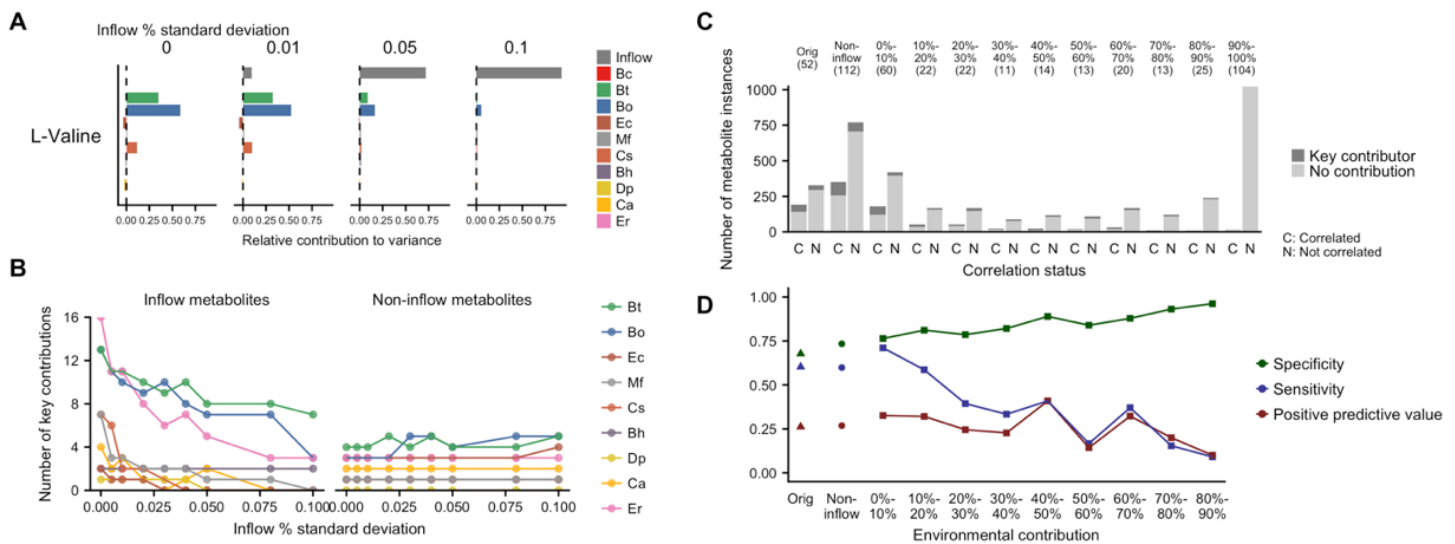

**Figure 5. Environmental fluctuations impact correlation-contributor sensitivity and specificity.** (A) Example set of contribution profiles for a single inflow metabolite, L-valine, with increasing fluctuations in its inflow. The relative contribution values for each species and for the inflow are shown for 4 sets simulation runs, each with a different degree of fluctuation. The label on each plot describes the relative standard deviation (coefficient of variation) of inflow metabolite concentrations for that set of simulations. The microbial contributions to variance in L-valine concentrations became relatively smaller with increasing variation from the external environment. (B) Shifts in key microbial contributors with increasing environmental inflow fluctuations. The number of key contributions of each species to the 52 analyzed metabolites is shown, separately for metabolites present in and absent from the nutrient inflow. Microbial contributors to inflow metabolites decreased as environmental contributions increased, but this effect varied between taxa. (C) Correlation analysis failed to detect key microbial contributors regardless of the size of contribution from external inflow variation. Across all sets of simulations, metabolites were binned based on the percent of total positive contribution from the external inflow. The bar plots shown have the same format as Figure 3A, showing the number of species-metabolites pairs that were significantly correlated (left bar) or not-correlated (right bar) and its correspondence with true species-metabolite key contributors (indicated by shade of gray). The first two bars, labeled “Orig” describe the original set of simulations (replicating Figure 3A). The next two show the results for non-inflow metabolites across all levels of inflow fluctuations. The remaining bars show the results for metabolites with increasing levels of environmental contribution. (D) Correlation analysis detected key microbial contributors with increased specificity, decreased sensitivity, and generally consistent positive predictive value with increasing contribution from the external inflow. Sensitivity, specificity, and positive predictive value are shown for same environmental contribution bins as in Panel C.

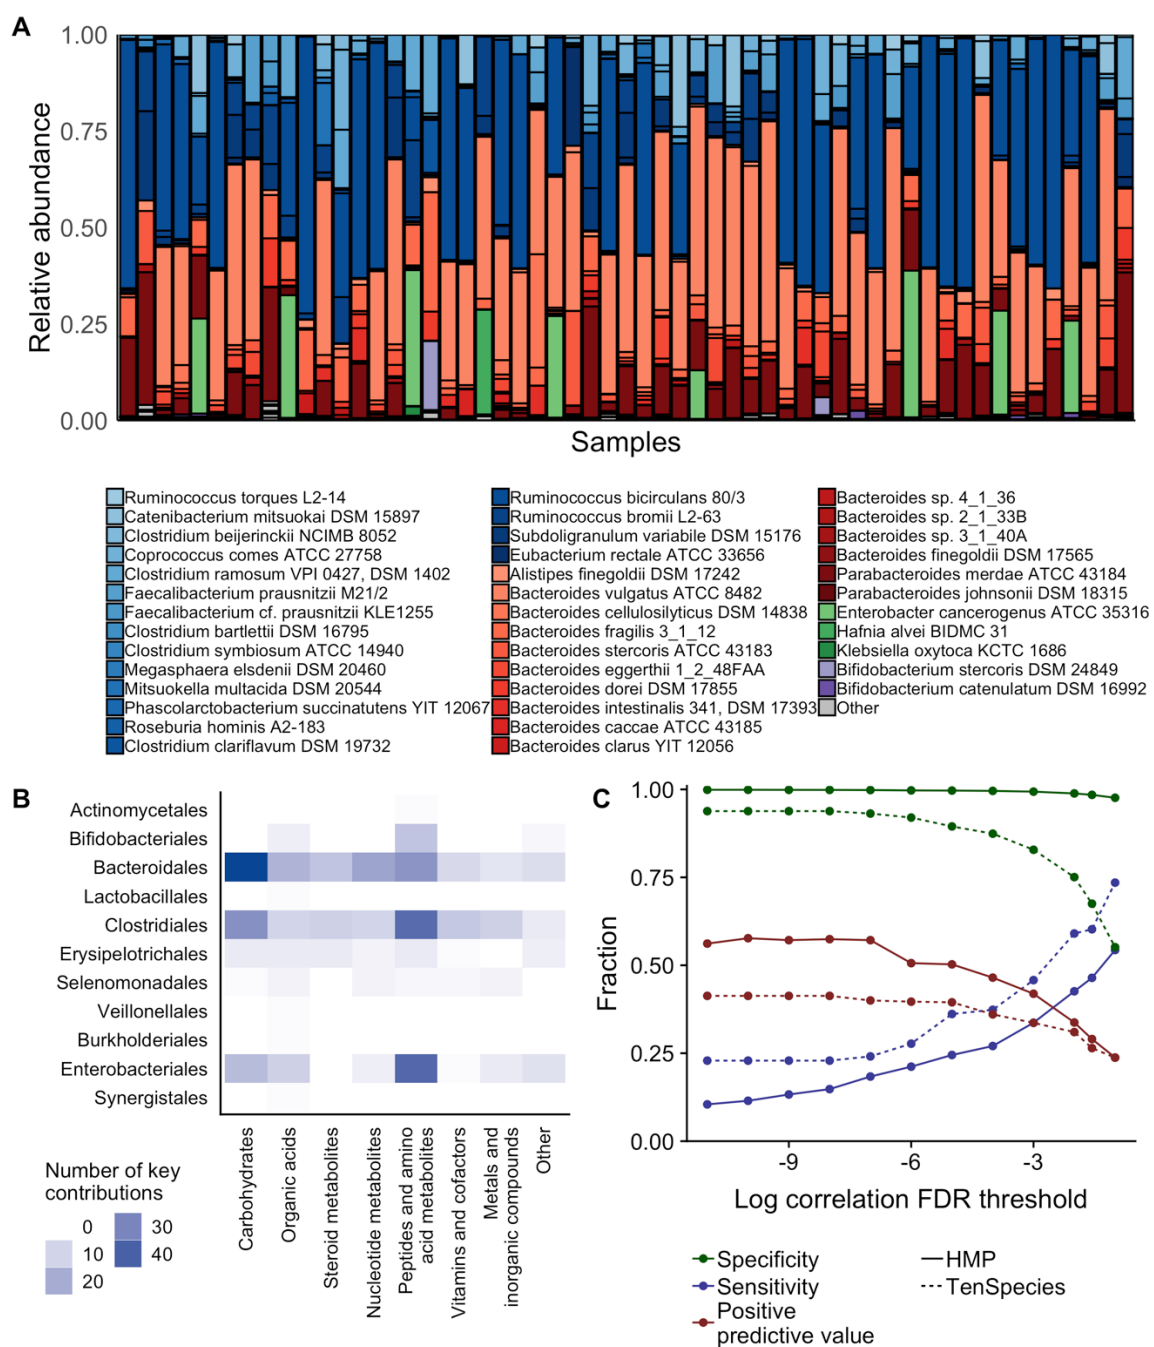

**Figure 6. Correlation-contribution discrepancies persist in simulations of complex human gut-based microbiota. (A)** Species abundances of the 57 Human Microbiome Project (HMP) based-simulations at the 144 hour time point. Shades of blue indicate species in the phylum Firmicutes; red, Bacteroidetes; green, Proteobacteria; and purple, Actinobacteria. **(B)** Key contributions to metabolite variation across the HMP-based dataset, summarized at the level of taxonomic orders and metabolite categories. **(C)** Performance of correlation analysis for identifying key species-metabolite contributors in the HMP-based dataset (solid lines) compared with the original 10-species dataset (dashed lines) across varying significance levels, using Benjamini-Hochberg false discovery rate (FDR) corrected  $p$ -values.

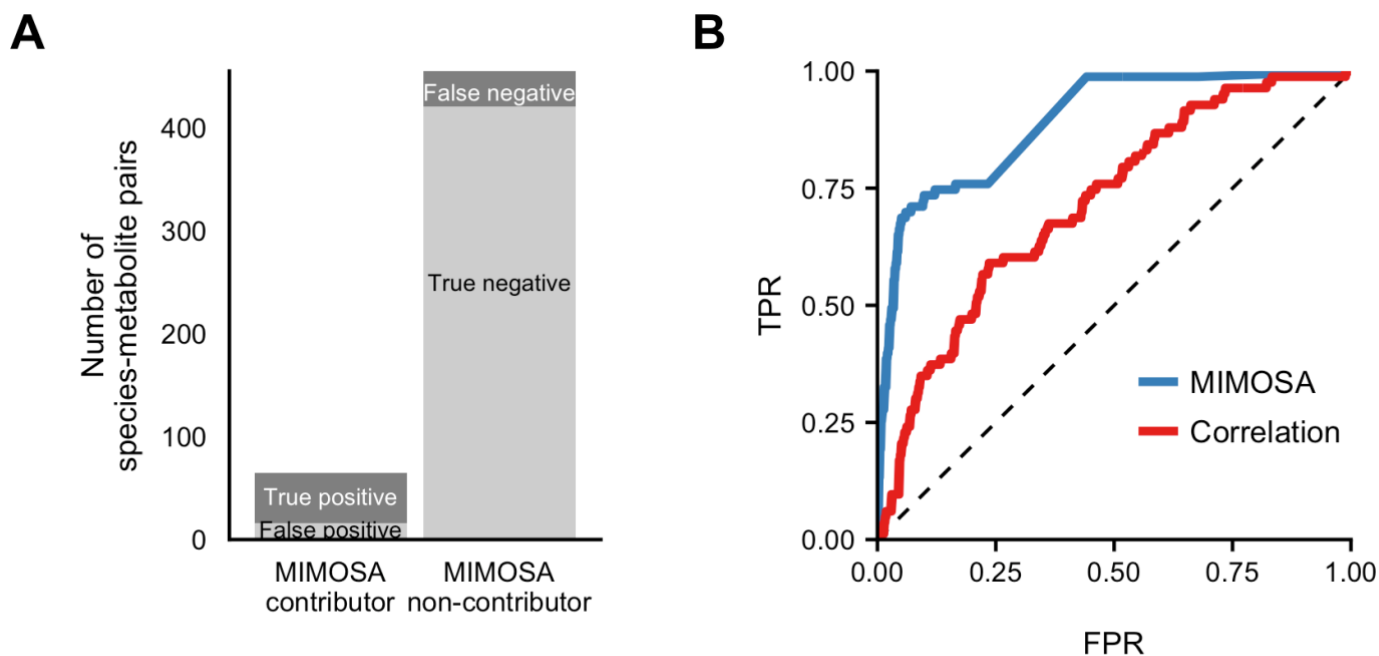

**Figure 7. MIMOSA identified key microbial contributors more accurately than correlation analysis. (A)** The number of species-metabolite pairs that were identified as potential contributors (left bar) or not (right bar) by MIMOSA, and its correspondence with true key contributors. **(B)** Receiver operating characteristic (ROC) plot, showing the ability of both MIMOSA and absolute Spearman correlation values to classify key contributors among all species-metabolite pairs.
