1 **Defining and Evaluating Microbial**  
2 **Contributions to Metabolite Variation in**  
3 **Microbiome-Metabolome Association**  
4 **Studies**

5  
6 Cecilia Noecker<sup>1</sup>, Hsuan-Chao Chiu<sup>1,2</sup>, Colin P. McNally<sup>1</sup>, and Elhanan Borenstein<sup>1,3,4,\*</sup>  
7

8 <sup>1</sup> Department of Genome Sciences, University of Washington, Seattle, WA 98195, USA

9 <sup>2</sup> Current affiliation: Office of Chief Technology Officer, MediaTek Inc., Hsinchu City, Taiwan 30078

10 <sup>3</sup> Department of Computer Science and Engineering, University of Washington, Seattle, WA 98195, USA

11 <sup>4</sup> Santa Fe Institute, Santa Fe, NM 87501, USA

12 \* Corresponding Author ([elbo@uw.edu](mailto:elbo@uw.edu))

## 13 **Abstract**

14 Correlation-based analysis of paired microbiome-metabolome datasets is becoming a  
15 widespread research approach, aiming to comprehensively identify microbial drivers of  
16 metabolic variation. To date, however, the limitations of this approach have not been  
17 evaluated. To address this challenge, we introduce a mathematical framework to  
18 quantify the contribution of each taxon to metabolite variation based on uptake and  
19 secretion fluxes. We additionally use a multi-species metabolic model to simulate  
20 simplified gut communities, generating an idealized microbiome-metabolome dataset.  
21 We then compare observed taxon-metabolite correlations in this dataset to calculated  
22 ground-truth taxonomic contribution values. We find that correlation-based analysis  
23 poorly identifies key contributors even in these idealized settings, with extremely low  
24 predictive value and accuracy. Importantly, however, we demonstrate that the predictive  
25 value of correlation analysis is strongly influenced by both metabolite and taxon  
26 properties, as well as exogenous environmental variation. We finally discuss the  
27 practical implications of our findings for interpreting microbiome-metabolome studies.  
28

## 29 **Importance**

30 Identifying the key microbial taxa responsible for metabolic differences between  
31 individual microbiomes is an important step towards understanding and manipulating  
32 microbiome metabolism. To achieve this goal, researchers commonly conduct  
33 microbiome-metabolome association studies, comprehensively measuring both the  
34 composition of species and the concentration of metabolites across a set of microbial  
35 community samples, and then testing for correlations between microbes and  
36 metabolites. Here, we evaluated the utility of this general approach by first developing a  
37 rigorous mathematical definition of the contribution of each microbial taxon to metabolite  
38 variation, and then examining these contributions in a simulated dataset of microbial  
39 community metabolism. We found that standard correlation-based analysis of our  
40 simulated microbiome-metabolome dataset identifies true contributions with very low  
41 accuracy, and that its performance depends strongly on specific properties of both  
42 metabolites and microbes, as well as on the surrounding environment. Combined, our  
43 findings can guide future interpretation and validation of microbiome-metabolome  
44 studies.

45

46

## 47 **Introduction**

48 Microbial communities have a tremendous impact on their surroundings, ranging from  
49 the degradation of environmental toxins (1) to the production of climate change-relevant  
50 metabolites (2). Host-associated communities, in particular, have a substantial impact  
51 on their hosts, and often produce a diverse set of metabolites that interact with  
52 numerous host pathways. In humans, such microbiome-derived metabolites have been  
53 identified as contributing factors to a wide array of diseases including heart disease (3),  
54 autism (4), non-alcoholic fatty liver disease (5), colon cancer (6), inflammatory bowel  
55 disease (7), and susceptibility to infection (8). Characterizing the ways microbial  
56 communities modulate their environments and the relationship between community  
57 structure and metabolic impact is therefore a major, timely, and complex challenge with  
58 promising implications for human health, as well as to environmental stewardship,  
59 agriculture, and industry.

60

61 When facing this challenge, perhaps the most important task is identifying specific  
62 community members that drive variation in metabolites of interest. Taxa responsible for  
63 observed metabolic differences across communities may be ideal targets for  
64 interventions aiming to modify metabolic phenotypes. Their identification, however, can  
65 be a daunting task. Complex microbial communities are often composed of hundreds or  
66 thousands of poorly characterized species, each with a unique and frequently unknown  
67 complement of metabolic capacities. Even when multiple species are known to possess  
68 the potential to synthesize or degrade a metabolite of interest, the metabolic activity of  
69 each species (and consequently, its contribution to metabolic variation) may be different

70 (9). Moreover, community ecology, interspecies interactions, and nutrient availability  
71 (e.g., via diet) can all regulate and influence the metabolic activity of each species,  
72 rendering the link between community members and metabolic products extremely  
73 complex and challenging to infer (10–12).

74

75 To address this challenge and to identify community members that play an important  
76 role in metabolic variation, a growing number of studies are now comprehensively  
77 assaying multiple facets of community structure across samples, including, most  
78 notably, taxonomic and metabolite compositions (13). For example, to investigate the  
79 links between taxonomic shifts and metabolic phenotypes in the healthy vaginal  
80 microbiome and in bacterial vaginosis, a recent study used a combination of 16S rRNA  
81 qPCR, sequencing, and both global and targeted metabolomics (14). Another study,  
82 aiming to identify taxonomic and metabolic features of resistance and susceptibility to *C.*  
83 *difficile* infection in the mouse gut similarly applied 16S rRNA sequencing and global  
84 metabolomics (15). In another example, researchers characterized metabolic and  
85 microbial features of periodontitis in the oral microbiome before and after treatment,  
86 combining 16S rRNA sequencing, shotgun metagenomic sequencing, and  
87 metabolomics (16). These are just a few examples of a plethora of recent microbiome-  
88 metabolome studies, investigating the metabolic effects of microbiome variation in the  
89 contexts of chronic and infectious disease, agriculture, precision medicine, nutrition,  
90 fermented food science, and more (17–24). Such multi-omic studies are also a major  
91 focus of several large-scale initiatives to study both host-associated and environmental  
92 microbiomes (25, 26).

93

94 Given the taxonomic and metabolomic profiles obtained via such microbiome-  
95 metabolome assays, the vast majority of studies rely on simple univariate correlation-  
96 based analyses to link variation in community ecology to variation in metabolic activity  
97 (11, 14, 15, 27–30). Such analyses specifically aim to identify species whose  
98 abundance across samples is correlated with the concentration of metabolites, often  
99 assuming that highly significant correlations reflect a direct mechanistic link between the  
100 taxon and metabolite in question. These studies further regularly assume that positive  
101 correlations imply synthesis and negative correlations imply degradation, or that  
102 targeting the microbe in question could be used to modulate the concentrations of the  
103 metabolites with which it is correlated. For example, a recent study characterizing the  
104 microbiome and metabolome in Spleen-yang-deficiency syndrome (29) concluded that a  
105 positive correlation between *Bacteroides* and mannose likely resulted from extracellular  
106 degradation of mannan into mannose by that taxon. Similarly, a study of antibiotic  
107 perturbations to the microbiome and metabolome stated that the presence of several  
108 weak positive and negative correlations between genera and arginine supported the  
109 conclusion that arginine levels may be affected by many community members with high  
110 functional redundancy (27).

111

112 Yet, to date, the extent to which a correlation-based analysis effectively detects direct  
113 metabolic relationships between taxa and metabolites is unclear. Obviously, a strong  
114 correlation between the abundance of a certain species and the concentration of a  
115 metabolite across samples *could* reflect direct synthesis or degradation of the

116 metabolite by that species, but could also arise due to environmental effects, precursor  
117 availability, selection, random chance, or co-occurrence between species. Similarly,  
118 cross-feeding, external host processes, and varying enzymatic regulation can mask a  
119 correlation even when this species does in fact contribute to observed metabolite  
120 variation. Indeed, previous studies have suggested that microbe-metabolite correlations  
121 must have a high rate of false positives (31), and a recent experimental study pairing  
122 microbiome-metabolome correlation analysis with *in vitro* monoculture validations found  
123 anecdotally that several observed correlations were in fact false positives (32).

124

125 Importantly, two crucial challenges hinder a comprehensive and systematic evaluation  
126 of correlation-based analysis. The first is the lack of a rigorous general definition of a  
127 microbe's contribution to metabolite variability. While establishing the main taxonomic  
128 contributors to metabolite variation may be straightforward for specialized, well-  
129 characterized metabolites that are synthesized by just a single taxon, it can be much  
130 less clear for metabolites that can be synthesized (and/or degraded or modified) by  
131 many different taxa in the community. The second challenge is the absence of ground  
132 truth data on the nature of microbe-metabolite relationships. While limited data on the  
133 taxa driving metabolite shifts can be obtained from comparative mono- and co-culture  
134 studies (32–34), large-scale and comprehensive datasets that link species and  
135 metabolite abundances in the context of a complex community, for which the precise  
136 impact of each species on observed metabolite variation is known, are currently not  
137 available.

138

139 In this study, we address these two challenges, combining a framework for quantifying  
140 microbial contributions with a model-based simulated dataset. Specifically, we first  
141 introduce a generalizable and rigorous mathematical framework for decomposing  
142 observed metabolite variation and quantifying the contribution of each community  
143 member to this variation based on uptake and secretion fluxes. Second, we use a  
144 dynamic multi-species genome-scale metabolic model to simulate the metabolism of a  
145 set of simple microbial communities and to generate an idealized dataset of paired  
146 taxonomic and metabolomic abundances, with complete information on metabolite  
147 fluxes, microbial growth, interspecies interactions, and environmental influences.  
148 Applying our mathematical framework to this simulated dataset, we could then compare  
149 calculated contribution values to observed taxon-metabolite correlations and evaluate  
150 the ability of correlation-based analyses to identify key microbial contributors. We were  
151 additionally able to investigate factors that shape the relationship between community  
152 composition and metabolism in depth and to identify specific properties and  
153 mechanisms that impact the performance of microbiome-metabolome correlation  
154 studies.

155

156 Notably, given the objectives of this study, we intentionally focus on characterizing  
157 microbiome-metabolome relationship in a model-based, tractable, and well-defined  
158 setting. Indeed, our metabolic model may not perfectly capture the complex and diverse  
159 mechanisms that are at play in host-associated communities; however, considering the  
160 scope of this study, accurately modeling the metabolism of a specific community may  
161 not be crucial. Rather, for our analysis, we want our simulated data to recapitulate broad



162 trends observed in naturally occurring microbial ecosystems, as indeed has been  
163 observed in similar models (35–39). Moreover, utilizing this model-based approach  
164 allows us to dissect the relationship between community composition and metabolic  
165 phenotypes without the complexities inherent to *in vivo* communities (including spatial  
166 heterogeneity, measurement error, inter-microbial signaling, or strain-level variation),  
167 and with variation in the concentrations of environmental metabolites resulting  
168 exclusively from microbial metabolic activity. Analyzing the ability of a correlation-based  
169 analysis to detect true microbial drivers of metabolite variation in these simplified, best-  
170 case settings provides a baseline for the expected performances of such analyses in  
171 real microbiome-metabolome studies.

172

## 173 **Results**

### 174 ***Quantifying the impact of individual microbial species on variation in metabolite*** 175 ***concentrations***

176 In this study, we consider a microbial community as an idealized system, consisting of a  
177 population of multiple microbial species in a shared, well-mixed, biochemical  
178 environment. Each species uptakes necessary metabolites from the shared  
179 environment, performs a variety of metabolic processes to promote its growth, and  
180 secretes certain metabolites back into the shared environment. We additionally assume  
181 that certain nutrients flow into the environment and that microbial cells and metabolites  
182 are diluted over time. These processes can represent, for example, the inflow of dietary  
183 nutrients and the transit through the gut in the context of the gut microbiome. For

184 simplicity, we primarily consider a constant inflow and dilution rate, as in a chemostat  
185 setting. Accordingly, a microbiome-metabolome study can be conceived as analyzing a  
186 set of several such communities (at a certain point in time), each with a different  
187 composition of microbial species and correspondingly variable environmental metabolite  
188 concentrations. We focus initially on a controlled setting with identical nutrient inflow  
189 across all microbiomes, but later examine the impacts of differences in nutrient inflow  
190 between communities.

191

192 Given this setting, we first sought to establish a rigorous and quantitative framework for  
193 defining the impact of each microbial species (or any taxonomic grouping) in the  
194 community on the variation observed in the concentration of a given metabolite across  
195 community samples. We focused on species that *directly* modulate the environmental  
196 concentration of a given metabolite via synthesis or degradation, ignoring indirect  
197 effects via, for example, the synthesis of a precursor substrate that could impact the  
198 metabolic activity of other species. We noted that the total concentration of a metabolite  
199 in the environment can be represented as the sum of cumulative synthesis or  
200 degradation fluxes of this metabolite by each of the  $n$  species in the community, as well  
201 as cumulative environmental fluxes (e.g., total nutrient inflow and dilution). Formally, the  
202 metabolite concentration,  $M$ , can therefore be expressed as a sum of  $n$  dependent  
203 random variables  $m_i$ , where each  $m_i$  denotes the overall synthesis or degradation of the  
204 metabolite by each species, along with an additional random variable  $m_{env}$ , denoting the  
205 overall impact of environmental processes.

206

207

$$M = \sum_{i=1}^n m_i + m_{env}$$

208

209 As discussed above, when analyzing microbiome-metabolome datasets, the goal is  
210 often to identify taxa responsible for *changes* in the concentration of a metabolite of  
211 interest across a set of samples. Accordingly, here we wish to quantify the *contribution*  
212 of each species to the *variance* in the concentration of that metabolite across samples.  
213 Specifically, in the formulation  
214 above,  $var(M)$  depends on the variance in the constituent microbial and environmental  
215 factors, as well as the covariance between these components. This variance can then  
216 be linearly  
217 separated into  $n+1$  terms, representing the contribution of each species (and of any  
218 environmental nutrient fluxes) to the total variation in the metabolite:

219

$$var(M) = \sum_{i=1}^n c_i + c_{env}; c_i = var(m_i) + \sum_{j \neq i} cov(m_i, m_j) + cov(m_i, m_{env})$$

221

222 If the nutrient inflow is constant across samples, its effect can be ignored and its  
223 contribution to the variance is 0. Additionally, in a chemostat setting, the dilution of each  
224 metabolite can be accounted for in the calculation of each contribution, as it depends  
225 strictly on the dilution rate and on previous metabolite concentrations (Methods). Finally,  
226 in order to compare species contributions across metabolites and to represent the  
227 relative share of the total variance of a given metabolite that is attributable to species  $i$ ,  
228 we defined the *relative* contribution to variance  $\hat{c}_i$  of each species  $i$  to metabolite  $M$  by

229 normalizing contribution values by the metabolite's total variance:

230

$$232 \quad \hat{c}_i = \frac{c_i}{\text{var}(M)}$$

231

233 This framework for calculating microbial contribution values provides a systematic  
234 measure of the causal impact of each taxon on observed variation in the environmental  
235 concentration of each metabolite, distilling the effect of complex ecological and  
236 metabolic interactions to a concise and interpretable set of quantities. Moreover, the  
237 obtained contribution profile is a linear decomposition of observed metabolic variation,  
238 wherein the sum of contributions of all species equals the observed variation in the  
239 metabolite. Notably, when a species' activity has large negative covariances with the  
240 activities of other community members, contribution values can be negative. Such  
241 negative contribution values indicate that a species' secretion or uptake of that  
242 metabolite varies in a way that mitigates the activity of others. Correspondingly,  
243 contribution values can be greater than 1, reflecting scenarios in which a species in fact  
244 generates more variation of this metabolite than is ultimately observed, but that its  
245 impact is mitigated by other species.

246

247 It is also worth noting that our analytical decomposition of contributions to variance is  
248 mathematically equivalent to calculating the Shapley values for the variance in  
249 metabolite concentrations (see Methods and Figure S1). Shapley value analysis is a  
250 game theory technique that defines an individual's contribution to a collective outcome,  
251 and has been shown to be the only general definition that is efficient, linear, symmetric,

252 and assigns zero values to null contributors (40). A similar, Shapley value-based  
253 approach was recently applied to address the related problem of identifying the primary  
254 taxonomic contributors to differential functional abundances in metagenomic data (41).

255

256 ***A multi-species metabolic model for generating complex microbiome-***  
257 ***metabolome data***

258 We next set out to generate a large-scale dataset of microbiome-metabolome profiles  
259 with complete information about metabolite uptake and secretion fluxes. To this end, we  
260 used a multi-species metabolic model to simulate the growth, dynamics, metabolism,  
261 and environment of a simple microbial community. This model is based on a previously  
262 introduced genome-scale framework for modeling the metabolism of multi-species  
263 communities and for tracking the metabolic activity of each community member over  
264 time (42, 43). Briefly, this framework assumes that each species optimizes its growth  
265 selfishly given available nutrients in the shared environment and predicts the metabolic  
266 activity for each species in short time increments using Flux Balance Analysis (44). After  
267 each increment, the model uses the predicted metabolic activities of the various species  
268 to update the biomass of each species and the concentration of metabolites in the  
269 shared environment (hence, potentially impacting the growth and metabolism of other  
270 species in subsequent time steps). Full details of this model and simulation parameters  
271 can be found in the Methods.

272

273 We specifically modeled a simplified gut community that was previously explored  
274 experimentally (45). This community includes 10 representative gut species, spanning

275 the major clades found in the human gut and collectively encoding the key metabolic  
276 processes taking place in this environment, including breakdown of complex dietary  
277 polysaccharides, amino acid fermentation, and removal of fermentation end products  
278 via sulfate reduction and acetogenesis. Genome-scale metabolic models of these 10  
279 species were obtained from the AGORA collection (38) – a recently introduced set of  
280 high-quality gut-specific metabolic models. To mimic the experimental gnotobiotic  
281 mouse setting (45), we simulate growth in a chemostat, with a nutrient inflow mimicking  
282 the content of a standard corn-based mouse chow, and a dilution rate consistent with  
283 mouse transit time and gut volume. While maintaining this nutritional environment, we  
284 systematically explored the landscape of possible community compositions, varying the  
285 initial relative abundance of each species from 10% to 60% (with a consistent total  
286 abundance equal to the community carrying capacity), resulting in a total of 61 different  
287 community compositions. For the analysis below, we simulated growth for 144 hours (as  
288 576 15-minute time steps). For most community compositions considered, this  
289 simulation time consisted of an initial stabilization period followed by a period of near-  
290 steady-state equilibrium (Figure 1A). Notably, across the various simulations, some  
291 species maintained high abundances throughout the course of the simulation, while  
292 others reverted to lower levels.

293

294 Throughout the course of each simulation, we recorded the abundances of each  
295 species, the secretion and uptake rate of each metabolite by each species (as well as  
296 internal reaction fluxes), and the concentration of each metabolite in the environment  
297 (Figure 1A-B), thereby obtaining a comprehensive dataset describing species

298 composition, metabolic activities, and metabolite concentrations across 61 different  
299 communities. To mirror the typical structure of a microbiome-metabolome cross-  
300 sectional dataset, we specifically considered the abundances of species and the  
301 concentrations of metabolites in the environment at the end of each simulation (i.e.,  
302 after the final time point; see Figure 1). 60 of the 68 metabolites present in the nutrient  
303 inflow (46) exhibited at least some variation across communities, as did 18 additional  
304 microbially-produced metabolites. Metabolite variation was generally low (median  
305 coefficient of variation 0.021), reflecting a relatively stable nutrient environment, yet 25  
306 metabolites (32%) did have a coefficient of variation greater than 0.1. For downstream  
307 analysis, we excluded metabolites without substantial measurable variance across  
308 samples, filtering those with variance at or below the 25<sup>th</sup> percentile. This resulted in a  
309 dataset of 52 variable metabolites, of which 14 are purely microbially-produced  
310 metabolites, 9 are microbially-produced but also present in the nutrient inflow, and 29  
311 are introduced only through the nutrient inflow. Of these 52 variable metabolites, 47 are  
312 utilized by any member of the community (including 18 that are cross-fed in at least one  
313 simulation). The final species compositions and the final concentrations of several key  
314 metabolites across all simulations are shown in Figure 2A-F.

315

316 Exploring this dataset, we found that species composition and metabolite  
317 concentrations exhibited complex patterns and biologically reasonable distributions  
318 (Figure S2) (47). Several metabolic processes known to occur in the mammalian gut  
319 were replicated by our simulations, including, for example, conversion of acetate to  
320 butyrate by *E. rectale* (46), and production of key microbial metabolites such as 4-

321 aminobutyric acid (GABA), indole, and succinate. Cross-feeding relationships were  
322 observed frequently (18 metabolites), including cross-feeding of 6 amino acids, whose  
323 exchange is widespread in host-associated microbiota (48).

324

325 Clearly, the model and simulations described above represent a gross simplification of  
326 the microbiome's structure, dynamics, and function. Importantly, however, this  
327 simplification is also an important strength. Specifically, the data obtained from these  
328 simulations provide a unique opportunity to examine the relationship between  
329 community dynamics and metabolic activity in a realistic, yet tractable model of  
330 community metabolism where complete information about the activity and fluxes of each  
331 microbial species is available (Figure S3). Indeed, our multi-species model captures  
332 many of the intricacies of bacterial genome-scale metabolism and the  
333 interconnectedness (both within and between species) of multiple metabolic processes,  
334 yet without additional complexities inherent to *in vivo* communities. Furthermore, in our  
335 simulations, variation in the concentrations of environmental metabolites results  
336 exclusively from microbial metabolic activity, with no variation in nutrient inflow or other  
337 non-microbial sources, providing a controlled setting for evaluating the relationship  
338 between community members and metabolite concentrations.

339

#### 340 ***Metabolite variation is driven by diverse microbial mechanisms***

341 Given the simulated dataset described above (for which uptake and secretion fluxes are  
342 known), we applied our contribution framework to calculate the contribution of each  
343 species to the variation observed in each of the 52 variable metabolites (Figure S4).



344 The resulting contribution values can be used as ground-truth information about the link  
345 between microbial activity and environmental metabolites.

346

347 To highlight the nature and utility of such contribution values, and to demonstrate how  
348 metabolic fluxes translate into contribution profiles, we first describe our results for  
349 several example metabolites (Figure 2). Putrescine, an amino acid fermentation  
350 product, is an example of the simplest case, in which one microbial species – *E. coli* –  
351 synthesizes a metabolite that is not utilized or modified by other community members.  
352 Variation in the environmental concentration of putrescine was hence fully determined  
353 by the level of secretion from *E. coli*, which is therefore assigned a relative contribution  
354 of 1 (Figure 2B). Tetradecanoic acid, in contrast, was introduced (at a constant rate) via  
355 the nutrient inflow and utilized by the three *Bacteroides* species in the community to  
356 varying degree (primarily by *B. ovatus* and to a slightly lesser extent by *B.*  
357 *thetaiotaomicron*). The calculated contribution values successfully attributed variation in  
358 the environmental concentration of this metabolite to these three species, and correctly  
359 captured the difference in the magnitude between their effects (Figure 2C). Variation in  
360 uracil, another metabolite introduced via the nutrient inflow, was mainly driven by large  
361 shifts in its uptake by *B. ovatus*, but this effect is partially masked by *E. rectale*, which  
362 reduced its uptake when *B. ovatus*' flux was high and vice versa. Other species also  
363 utilized uracil, but at relatively similar levels across samples, and accordingly with  
364 relatively little impact on its variation. These complex patterns were all captured by the  
365 contribution profile obtained by our framework, with *B. ovatus* assigned a high positive  
366 contribution, *E. rectale* assigned an intermediate *negative* contribution, and other

367 species assigned relatively negligible contribution values (Figure 2D). More complex  
368 species-metabolite relationships were also accurately and effectively summarized.  
369 Contribution values for acetate, for example, reflected the cross-feeding interactions  
370 that underlie variation in its concentration (Figure 2E). It was introduced to the shared  
371 environment by several species (primarily *C. symbiosum*), but most of its variation  
372 ultimately depended on the level of uptake by *E. rectale*. Finally, the contribution profile  
373 of succinate demonstrates how extremely strong interspecies interactions can produce  
374 contribution values much greater than the observed variance (Figure 2F). In the  
375 simulated data, this metabolite was synthesized by *B. hydrogenotrophica*, but was  
376 almost always fully utilized by other community members. The calculated contributions  
377 suggest that if the synthesis of succinate by *B. hydrogenotrophica* would not have been  
378 offset by uptake from other species, the variance in succinate concentration across  
379 samples would have been 71.7 times higher than is actually observed. (Note that the  
380 difference between positive and negative is always 1.)

381

382 Examining the complete set of variable metabolites and calculated contribution values  
383 revealed similar patterns of interactions (Figure S4). Specifically, as for the metabolites  
384 discussed above, negative contributions and/or contribution values greater than 1 were  
385 widespread. Nearly all metabolites (50 out of 52) had at least one species with a  
386 negative contribution value, and 36 had at least one species with a contribution value  
387 greater than 1. Of the 32 other metabolites with negative contributions, 29 were present  
388 in the nutrient inflow and their negative contributions result from competition between  
389 species for their uptake. This prevalence of negative and extreme values suggests that

390 strong negative interspecies interactions have substantial impacts on metabolite  
391 concentrations, and that often, observed variation in a given metabolite's concentration  
392 is the complex outcome of multiple species generating and offsetting much higher  
393 variation.

394

395 It is also important to note that while the average metabolic uptake/secretion flux of  
396 each species and the magnitude of its contribution to a given metabolite were generally  
397 significantly correlated (Spearman,  $p < 0.01$  for 49 of the 52 metabolites), the species  
398 with the highest flux was often *not* the largest contributor to variation (26 of the 52  
399 metabolites). Similarly, the variance in a species' flux was significantly correlated with its  
400 contribution for 48 of the metabolites, but for 9 metabolites the species with the most  
401 variable flux was still not the largest contributor (due to differences in whether variable  
402 flux generated by one species is compensated by variation in the flux of another). These  
403 findings suggest that even if the magnitude and variation of species uptake and  
404 secretion fluxes across a set of microbiome samples are known (rather than just the  
405 abundances of species, which is the only measure usually assayed), metabolic  
406 interdependence between species would still make true contributor species challenging  
407 to identify.

408

409 Combined, the observations above highlight the complex relationship between species  
410 activity and measured metabolite concentrations, demonstrating the important role of  
411 both direct and indirect species interactions. This complex relationship, observed even  
412 in the idealized settings of our simulation model, is potentially markedly more complex

413 than what is assumed by many microbiome-metabolite association-based analyses.

414

415 ***Correlation analysis fails to detect true microbial contributors to metabolite***

416 ***variation***

417 Given our observations above, we next set out to comprehensively assess how well  
418 pairwise correlation analysis (commonly used for analyzing microbiome-metabolome  
419 data) can detect true taxonomic contributors to metabolite variance. Put differently, we  
420 evaluated the extent to which a correlation between species abundance and metabolite  
421 concentration across samples captures the true causative contribution of a species'  
422 metabolic activity to observed metabolite variation.

423

424 Following numerous microbiome-metabolome studies (14, 23, 28, 49), we considered  
425 identifying species-metabolite relationships as a classification task, aiming to identify for  
426 each metabolite the set of species that are primarily responsible for the variation  
427 observed in its concentration across samples. To this end, we defined *key contributor*  
428 species for each metabolite as those with a contribution value greater than 10% of the  
429 total positive contribution values. This resulted in a set of 83 species-metabolite key  
430 contributor pairs, representing true links between species activity and metabolite  
431 variation. On average, each metabolite had only 1.6 contributors (Figure S5), although  
432 7.5 species on average had utilized or synthesized each metabolite at any point. 31.3%  
433 of these contributions occurred via synthesis reactions, 66.3% via utilization, and 2.4%  
434 (2 instances) via both processes. We then calculated the Spearman rank correlations  
435 between species abundances and metabolite concentrations across samples, and used

436 a  $p$ -value threshold of 0.01 to define significant correlation between species and  
437 metabolites. This produced a set of 191 significant species-metabolite correlations,  
438 representing putative species-metabolite links.

439

440 Comparing this set of significant species-metabolite correlations to the set of species-  
441 metabolite key contributors clearly illustrated the difficulty of using univariate  
442 associations to infer mechanistic contributions (Figure 3). Indeed, of the 191 significant  
443 species-metabolite correlations, the vast majority (141) were false positives  
444 (corresponding to a positive predictive value of only 26.2%), and did not represent true  
445 contributor relationships (Figure 3A). Moreover, more than a third of these false positive  
446 species-metabolite pairs (51 out of 141) had *no* mechanistic connection; i.e., the  
447 species did not ever use or produce the metabolite in question. Furthermore, for 12  
448 variable metabolites (out of 52), none of the key contributors were successfully detected  
449 by a correlation analysis. The overall accuracy was somewhat higher (66.5%), reflecting  
450 the high number of non-contributors that are also not correlated. Using a stricter cutoff  
451 ( $p < 0.0001$ , equivalent to a Bonferroni-corrected value of 0.05) only improved the  
452 positive predictive value to 33% and the accuracy to 77.1%. Indeed, a ROC curve  
453 analysis (Figure 3B) produced an area under the curve of 0.72, and overall correlations  
454 and scaled contribution values were only weakly associated (Figure 3C), suggesting  
455 that these findings can only be partially mitigated by changing classification thresholds.  
456 Metabolites of different classes had generally similar correspondence between  
457 correlations and contributions (Figure 3D).

458

459 Notably, key contributors for purely microbially-produced metabolites were not identified  
460 more accurately than those for metabolites in the nutrient inflow (66% versus 67%),  
461 which is perhaps not surprising since we used a constant inflow across samples (but  
462 see also our analysis below with variable inflow). Across species, contributions were  
463 identified most accurately for *D. piger*, which had a relatively low number of  
464 contributions (Figures 3E and S5C), but the positive predictive value was nonetheless  
465 <50% for all species.

466

467 Using an alternative classification task, aiming to detect all microbes that affect variation  
468 in a given metabolite across samples regardless of whether their effects are ultimately  
469 reflected in the observed concentrations, provided qualitatively similar findings  
470 (Supplementary Text, Figure S5).

471

472 ***Species and metabolite properties explain discrepancies between correlations***  
473 ***and contributions***

474 Our analysis above demonstrated that correlations between species abundances and  
475 metabolite concentrations can often be only poorly associated with true contribution of  
476 species to metabolite variation. We therefore next investigated the origins of such  
477 discrepancies, seeking to identify factors that lead to a significant species-metabolite  
478 correlation when the species in fact does *not* contribute to that metabolite variation (i.e.,  
479 false positives), and factors that mask such correlation when the species *does* in fact  
480 contribute to this metabolite variation (i.e., false negatives).

481

482 To determine whether the identity of the species or metabolite in question can explain  
483 inaccurate identifications of key contributors, we used a regression-based analysis.  
484 Specifically, we considered all species-metabolite non-contributor pairs, and fitted a  
485 logistic regression model to predict whether a species-metabolite pair exhibited  
486 significant correlation (false positive), based on either species identities, metabolite  
487 identities, or both (Methods). We then compared these three models using a likelihood  
488 ratio test to assess which of these features (i.e., species or metabolite identities) are  
489 informative. We similarly considered all species-metabolite key contributor pairs  
490 separately, again fitting a logistic regression model based on species identities,  
491 metabolite identities, or both to predict whether a pair failed to exhibit significant  
492 correlation (false negative).

493  
494 For non-contributors, we found that false positives can be explained largely by species  
495 identity (likelihood ratio test (LRT) for inclusion of species terms  $p < 10^{-13}$ ). Incorporating  
496 both species and metabolite identities did not significantly improve the model (LRT for  
497 metabolite terms  $p=0.72$ ). This finding suggests that false positives – correlations  
498 observed between species and metabolites to which they in fact did not contribute – are  
499 the outcome of interactions at the species level, regardless of the metabolite in  
500 question. This impact of strong interactions between features has been described  
501 extensively in other data types (50, 51). Indeed, examining the 141 false positives  
502 identified above, we found that many can be explained by the relationships between the  
503 three dominant species in this community: *E. rectale*, *B. thetaiotaomicron*, and *B.*  
504 *ovatus*. These species competed strongly for carbon sources (and utilized their

505 maximum allocation of sucrose, glucose, and fructose at nearly every step of the  
506 simulation), and their abundances were therefore negatively correlated. As a result,  
507 metabolites that varied due to the activity of one of these species were also frequently  
508 correlated with the other two. In total, 32 false positive correlations paired one of these  
509 species with a metabolite for which another species in this trio was a key contributor.  
510 More generally, we found that the probability of a false positive correlation for a  
511 particular species and metabolite depended on the species' correlation with the true key  
512 contributors for that metabolite ( $p=0.006$ , Spearman rho between share of false  
513 positives and interspecies correlation; Figure 4A). Moreover, the maximum correlation  
514 each species had with any other species is a strong predictor of its overall specificity,  
515 which varies widely from 33.3% for *E. rectale* to 92% for *D. piger* (Spearman rho=-0.84,  
516  $p=0.002$ ).

517

518 In the case of key contributors, we found that false negative correlations can be  
519 explained largely by metabolite identity (LRT for metabolite terms  $p=0.002$ ; although the  
520 species involved was also somewhat informative with LRT  $p=0.08$ ). Put differently, a  
521 lack of correlation between the abundance of a key contributor species and the  
522 concentration of the metabolite to which it contributed was determined mainly by the  
523 nature of the metabolite in question. This lack of correlation between a given metabolite  
524 and its contributors could have resulted from competition or exchange of a metabolite  
525 between multiple species, such that none of the involved species end up strongly  
526 associated with the final outcome on their own. Indeed, across all metabolites, the  
527 average correlation between a metabolite and its key contributors is negatively



528 associated with its number of key contributors (Spearman  $\rho=-0.45$ ,  $p=0.0008$ ). The  
529 number of key contributors for any metabolite was also thus negatively associated with  
530 the sensitivity of contributor detection for that metabolite (Spearman  $\rho=-0.48$ ,  
531  $p=0.0004$ ; Figure 4B). We further hypothesized that false negative outcomes might be  
532 more common for metabolites with more or larger negative species contributions, since  
533 these, by definition, mask or compensate for the activity of key contributor species.  
534 While all metabolites with a false negative outcome did have at least one species with a  
535 negative contribution value, as mentioned above, this was true for nearly all analyzed  
536 metabolites (50/52), and the number of negative contributing species was not  
537 associated with the occurrence of a false negative correlation ( $p=0.86$ , Wilcoxon rank  
538 sum test). Moreover, we also did not observe any effect of the average concentration of  
539 a metabolite on the sensitivity and accuracy of its detection via correlation analysis, nor  
540 of whether it is secreted, utilized, or cross-fed (Figure 4C). In summary, our analysis  
541 suggests that the largest factor explaining whether a metabolite's key contributor can be  
542 detected by a correlation analysis is simply whether there are other community  
543 members (key contributors) that also impact the observed concentration of that  
544 metabolite.

545

546 ***Environmental fluctuations in metabolite concentrations impact detection of key***  
547 ***contributors***

548 Our analyses above all focused on a single simulated dataset in which the nutrient  
549 inflow was constant across all samples, meaning that metabolite variation was fully  
550 governed by microbial activity. However, in reality, metabolite variation can and does

551 arise also from non-microbial sources, potentially affecting both the landscape of key  
552 microbial contributors and our ability to detect them via correlation-based analyses. To  
553 explore the impact of environmental fluctuations, we therefore ran several sets of  
554 additional simulations designed to emulate experimental settings with varying degrees  
555 of nutrient fluctuation. In the case of the gut microbiome, such fluctuations can  
556 represent, for example, changes in diet composition, host consumption or absorption, or  
557 other non-microbial processes. In these simulations, we maintained the same set of 61  
558 initial species compositions but added small amounts of stochastic noise to the nutrient  
559 inflow, sampling inflow concentrations for each compound in each simulation from a  
560 normal distribution with a mean equal to the compound's original inflow rate and a  
561 standard deviation ranging from 0.5% to 10% of the mean in 8 increments (Methods).  
562 For each of the resulting 8 datasets, we again calculated contribution values (with the  
563 added element of the nutrient inflow as a potential contributor to variance), identified key  
564 contributors, and compared them with the results of a correlation analysis.

565

566 Examining the obtained contribution values, we found, as expected, that variation in  
567 inflow quantities can outweigh the variation in microbial fluxes, and that as the variation  
568 in inflow increases, its contribution to metabolite variation increased at the expense of  
569 the contributions of community members (Figure 5A). As a result, the number of key  
570 contributions attributed to each species decreased for metabolites in the nutrient inflow  
571 (Figure 5B). Interestingly, however, some species lost their contributions more gradually  
572 than others, and in some cases even became key contributors for additional metabolites  
573 (Figure 5B).

574

575 We next examined how correlation-based detection of key microbial contributors was  
576 affected by these inflow fluctuations. We assigned each of the 52 metabolites in each of  
577 the 9 datasets (the original dataset with no inflow fluctuations and the 8 datasets with  
578 varying degree of fluctuations) to bins according to the level of contribution attributed to  
579 the inflow for this metabolite at that degree of fluctuation (see Methods). We then  
580 evaluated the performance of correlation analysis for each bin separately. The share of  
581 true key contributors naturally decreased rapidly with increasing environmental  
582 contribution, as did the number of significantly correlated species-metabolite pairs  
583 (Figure 5C). Importantly, however, the sensitivity of correlations decreased substantially  
584 with the level of contribution attributed to the inflow, but the specificity in fact increased  
585 from 67.7% to 96.2% (Figure 5D). This suggests that while environmental fluctuations  
586 disrupted the signal linking microbial species with the metabolites they impact, they also  
587 disrupted indirect associations between species and metabolites (false positives).  
588 Overall, however, the AUC did not change significantly with increasing environmental  
589 contribution (Figure S6A), and the positive predictive value is similarly relatively stable  
590 (and never rose higher than 41%). Interestingly, the detection of some metabolites not  
591 present in the inflow was also affected by inflow fluctuations in a similar manner  
592 (Supplementary Text, Figure S6B).

593

594

595

## 596 **Discussion: Insights and implications for microbiome-** 597 **metabolome analyses**

598 Above, we have investigated the ability of correlation-based analyses to detect key  
599 microbial contributors responsible for variation in metabolite concentrations across  
600 samples. Our findings suggest that microbe-metabolite correlation analysis may be a  
601 useful approach for exploratory analyses, but highlight some of the limitations and  
602 caveats of such microbiome-metabolome studies and identified several factors that  
603 impact the relationship between community composition and metabolite concentrations.  
604 Below, we elaborate on a set of practical conclusions and their implications for the  
605 analysis and interpretation of microbiome-metabolome studies.

606

607 **Association-based analyses of microbiome-metabolome assays have low**  
608 **predictive value for detecting direct species-metabolite relationships and require**  
609 **conservative interpretation.** Microbiome-metabolome association studies have been  
610 previously proposed as a powerful tool for the identification of causal mechanisms of  
611 microbiome metabolism (52), and indeed, such studies often present detected  
612 associations as evidence for mechanistic relationships (11, 27, 29). However, our  
613 analysis suggested that the positive predictive value of significant species-metabolite  
614 correlations for identifying true microbial contributors can be extremely poor (less than  
615 50% across all settings, and as low as 10% in the context of large environmental  
616 fluctuations). Recent experimental studies pairing microbiome-metabolite correlation  
617 analysis with *in vitro* monoculture validations have similarly observed many false

618 positive correlations (32). Additionally, given the somewhat low sensitivity observed in  
619 our analysis, a lack of association is not necessarily sufficient to reject a hypothesis that  
620 a particular microbial taxon impacts a particular metabolite. Identified correlations  
621 between microbial taxa and metabolites should therefore be interpreted very  
622 conservatively and used mostly to prioritize microbe-metabolite relationships for follow-  
623 up validation studies (e.g., via culture-based studies or germ-free model organism  
624 colonization). One potential approach for improving the predictive value of such  
625 correlation-based analyses is to examine whether they replicate across multiple  
626 conditions. Indeed, we found that a correlation does provide stronger evidence for a  
627 contributor relationship if it persists across several different contexts. Across our 9  
628 simulated datasets with varied environmental fluctuations, the 41 species-metabolite  
629 pairs that were significantly correlated in every dataset were 2.2 times more likely to  
630 denote true key contributor relationships than other significant correlations (Fisher exact  
631 test,  $p=0.03$ ), although their positive predictive value was still relatively low (39.5%).

632

633 **The predictive power of correlation-based analysis is species-, metabolite-, and**  
634 **context- dependent.** In our dataset, metabolites varied widely in both contribution  
635 profiles and in their detectability via correlation analysis. In particular, the key  
636 contributors for metabolites acted upon by fewer species were identified more readily.  
637 Correlation analysis may thus identify microbes involved in specialized secondary  
638 metabolic processes (e.g. products of complex biosynthetic pathways) more readily  
639 than those involved in more widespread processes. Therefore, correlation-based  
640 approaches may be more informative for analyzing compounds that are specific to a

641 small number of taxa, but accurate dissection of the taxa controlling variation in widely-  
642 trafficked metabolites may require more detailed analysis and experimentation.  
643 Similarly, we found that species-metabolite correlations for species that are strongly  
644 associated with other taxa (e.g., those with tight interactions with other community  
645 members) are often spurious, suggesting that such correlations should be regarded less  
646 confidently.

647

648 **External metabolic fluctuations can strongly impact the detection of microbial**  
649 **contributions.** Our analysis of the impact of environmental fluctuations suggested that  
650 the presence of environmental variability from a diverse set of samples could in fact  
651 increase correlation specificity. We also found that the sensitivity of correlation analysis  
652 rapidly decreased with increasing environmental fluctuations (from 60% to 9%). These  
653 observations suggest that while a strictly controlled environment (e.g., a fixed diet) is  
654 intuitively expected to increase the strength of microbiome-metabolome studies, its  
655 value depends on the study priorities. Specifically, if the goal is to identify clear-cut  
656 microbial drivers of healthy- and disease-associated metabolite shifts, the presence of  
657 environmental variability could be beneficial as it may reduce the rate of false positive  
658 associations. In contrast, for studies searching for a particular microbial taxon's  
659 involvement in a particular process (e.g. aiming to determine whether an ingested  
660 probiotic impacts aspects of gut metabolism), a more controlled environment may be  
661 favorable. It should however be noted that our findings were based on environmental  
662 fluctuations that were uniform and independent, which may not hold for real-life  
663 environmental fluctuations such as diet variation. It is also worth noting that in our

664 simulations, microbial fluxes for some environmental metabolites could be drowned out  
665 by as little as 0.5% variation in nutrient inflow quantities, while others still had  
666 substantial microbial contributions even with 10% variation in inflow. When interpreting  
667 an observed association, the scale of possible microbial variation relative to external  
668 variation should therefore be taken into account.

669

670 **Mechanistic reference information can improve the predictive power of**  
671 **microbiome-metabolome studies.** In our simulated dataset, 36% of the false positive  
672 correlations occurred between a metabolite and a species that was in fact not capable  
673 of uptaking or secreting that metabolite. Ruling out such falsely detected links would  
674 substantially improve the positive predictive value of a correlation-based analysis. One  
675 approach for doing so is by utilizing genomic information, which can be obtained or  
676 predicted for many microbial taxa (53). By coupling such genomic information with  
677 metabolic databases such as KEGG or MetaCyc (54, 55), researchers can filter out  
678 correlation-based links that are likely not feasible causative relationships. Further  
679 improvement can be obtained by integrating such reference information directly into the  
680 analysis. Indeed, we previously introduced a computational framework, termed  
681 MIMOSA (56), that utilizes a simple community-wide metabolic model to assess  
682 whether measured metabolite variation is consistent with shifts in community metabolic  
683 potential, and to identify potential contributing taxa. MIMOSA has been applied to varied  
684 host-associated microbiomes from varied body sites and from human and mouse hosts  
685 (12, 57, 58). Applying MIMOSA to the simulated species-metabolite dataset analyzed  
686 above (Methods), we found that it indeed identified key contributors significantly more

687 accurately than a correlation-based analysis, with an AUC of 0.89 (Figure 6). Notably, in  
688 this analysis, we assumed MIMOSA has access to the correct set of metabolic reactions  
689 possessed by each species. Using standard less-complete information obtained directly  
690 from the KEGG database (as done regularly when using this tool) reduced the number  
691 of metabolites that could be analyzed from 52 to 39, with improved specificity (96%) and  
692 positive predictive value (61%) and an ultimately comparable AUC (0.74). Combined,  
693 these findings suggest that reference model-based approaches can provide stronger  
694 evidence for mechanistic relationships than strictly correlation-based methods, but their  
695 use depends on complete and high-quality metabolic reference databases.

696

## 697 **Future opportunities and challenges**

698 Microbiome-metabolome studies have an important role in microbial ecology research.  
699 They specifically have great potential to dissect the metabolic interactions of complex  
700 microbial communities, and to unify “top down” and “bottom up” microbiome research  
701 approaches by providing mechanistic information at a systems level. Moreover, from a  
702 translational perspective, microbiome-metabolome studies can inform efforts to design  
703 targeted therapies to alter specific microbial or metabolic features of a community (13).  
704 Such interventions require first identifying putative targets, which in many cases may  
705 entail identifying the key contributor species that drive observed shifts in a particular  
706 beneficial or detrimental metabolic phenotype.

707



708 Importantly, while we show here that a correlation-based analysis may be limited in its  
709 ability to identify these key microbe-metabolite links, this does not necessarily imply an  
710 inherent limitation of microbiome-metabolome data. For example, analyzing our data,  
711 we found that species abundance is in fact a very good proxy for metabolic activity  
712 (median correlation of 0.996 between abundance and flux for all species-metabolite  
713 pairs). When we further examined whether false negative associations in our dataset  
714 stem from a disconnect between the abundance of a species and its metabolite uptake  
715 or secretion rates, we identified only 2 undetected key contributor pairs that could be  
716 explained by such a discrepancy. This analysis suggests that taxonomic abundance  
717 data is sufficient to explain and model community metabolic variation to great extent,  
718 despite common concerns about potential discrepancies between community  
719 composition and function. It also suggests that metatranscriptomic expression data may  
720 not provide much additional value for this purpose, as other studies have indicated (53,  
721 59, 60).

722

723 Given the increasing prevalence of microbiome-metabolome studies, their promise, and  
724 the caveats of association-based research discussed above, further development of  
725 computational and statistical methods for analyzing such datasets is clearly needed.  
726 Possible directions include the use of multi-species dynamic metabolic models that can  
727 replicate experimental observations (61), multivariate approaches for deconvolving  
728 interactions between species and the environment (62, 63), and probabilistic methods  
729 that can integrate prior information while allowing for other unknown mechanisms (31,  
730 64).

731

732 There is also a continued need for gold standards to evaluate new methods. This study  
733 is only a first step in that direction and has analyzed one specific type of research  
734 question: identifying microbial taxa directly responsible for variation in metabolite  
735 concentrations between samples in a cross-sectional study design. Although this focus  
736 describes many recent microbiome-metabolome studies, other studies may address a  
737 wide range of complementary research questions, and correspondingly, the desired  
738 “ground truth” can take different forms. Additionally, our findings rely on a single *in silico*  
739 system that does not capture many aspects of community metabolism. Further studies  
740 should also consider additional variables such as community diversity, sample size,  
741 measurement error, and other types of environmental variation. Ongoing technology  
742 developments in mass spectrometry and stable isotope probing will ideally enable future  
743 evaluation analyses using experimental, quantitative, species-specific community flux  
744 data to define key microbial contributors (65, 66). Such evaluations can also take  
745 advantage of datasets comparing community microbiome-metabolome data with *in vitro*  
746 monoculture or mono-colonization data (32–34).

747

748 Ultimately, much remains to be learned about the many processes through which  
749 complex microbial communities shape their environment. The first major call for the  
750 application of metabolomics to microbiome research, published 10 years ago (67),  
751 noted that new methods will be necessary to integrate genomic and metabolic data and  
752 inform the prediction of community metabolic properties from metagenomes. Now that  
753 microbiome-metabolome datasets are widely available, ongoing development of

754 analysis methods for these studies has great potential to generate new knowledge.  
755 Moreover, future work in this area stands to benefit from the utility of dynamic,  
756 multiscale metabolic modeling. Detailed mechanistic simulations are used widely in  
757 astronomy, climate science, and other fields to make methodological choices and  
758 assess possible experimental outcomes when ground truth measurements are  
759 unavailable or difficult to obtain (68, 69). An analogous strategy in microbiome research  
760 may be similarly fruitful.

761

## 762 **Methods**

### 763 ***Derivation of species contributors to variation***

764 We derived an expression representing the contribution of each species to the variance  
765 in the concentration of each metabolite. While we describe this calculation in terms of  
766 species, a similar calculation could be done at the level of phyla, strains, or any  
767 grouping of the community for which metabolite secretion and uptake fluxes are  
768 available.

769

770 The concentration of a given metabolite  $M$  at the end of a single simulation run is a  
771 function of the uptake and secretion fluxes (responding to the species' degradation and  
772 synthesis activities) of the  $n$  species, the environmental inflow over all time steps  $m_{in}$ ,  
773 and the dilution  $m_{out}$  out of the chemostat over all time steps:

$$774 \quad M = \sum_{i=1}^n m_i + m_{in} - m_{out}$$

775

776 The value of  $m_{out}$  at a given time step  $t$  is the product of the dilution rate  $D$  and the  
777 metabolite concentration at the previous time point (see above). This fact can be used  
778 to express  $m_{out}$  in terms of all the previously recorded environmental inflow and  
779 microbial activities. The metabolite concentration at any time point  $t$ ,  $M(t)$ , is then equal  
780 to:

781

782 
$$M(t) = \sum_{k=1}^{t-1} \left[ (1 - D)^{t-k-1} \sum_{i=1}^n m_{ik} \right] + m_{in} \sum_{k=1}^{t-1} (1 - D)^k,$$

783

784 where  $m_{ik}$  represents the activity of species  $i$  at a single time point  $k$ . We can then  
785 ignore dilution outflow by replacing each activity value  $m_i$  in the final concentration  
786 calculation above with a value corrected for the mitigating effect of chemostat dilution  
787 over the course of the simulation up to time  $t$ , defined here as  $m_i^*$ .  $m_i^*$  represents the  
788 total amount of a compound secreted or uptaken by species  $i$ , minus the share of that  
789 quantity that is eventually diluted out over the course of the simulation.

790

791 
$$m_i^* = \sum_{k=1}^{t-1} (1 - D)^{t-k-1} m_{ik},$$

792 and thus,

793 
$$M = m_{in} + \sum_{i=1}^n m_i^*$$

794

795 In this work, we refer to “environmental fluctuations” as the effect of the independently  
796 parameterized nutrient inflow,  $m_{in}$ , and where not otherwise specified we use  $m_i$  to imply  
797  $m_i^*$ , a species activity quantity that accounts for the corresponding subsequent dilution  
798 out of the system.

799

800 Using the expression above,  $var(M)$  can then be clearly expressed as a sum of  
801 correlated environmental and microbial random variables:

$$\begin{aligned} 802 \quad \text{var}(M) &= \sum_{i=1}^n \sum_{j=1}^n \text{cov}(m_i, m_j) + \sum_{i=1}^n \text{cov}(m_i, m_{env}) \\ 803 \quad &= \sum_{j=1}^n \text{var}(m_j) + \text{var}(m_{env}) + 2 \sum_{i=1}^n \sum_{j=i+1}^n \text{cov}(m_i, m_j) + 2 \sum_{i=1}^n \text{cov}(m_i, m_{env}) \end{aligned}$$

804

805 This expression can then be partitioned additively into  $n+1$  terms representing the  
806 contribution of each microbial species and of fluctuations in the environmental nutrient  
807 inflow.

808

$$809 \quad c_i = \sum_{j=1}^n \text{cov}(m_i, m_j) + \text{cov}(m_i, m_{env}) = \text{var}(m_i) + \sum_{j \neq i} \text{cov}(m_i, m_j) + \text{cov}(m_i, m_{env})$$

810

### 811 ***Multi-species Dynamic Flux Balance Analysis modeling***

812 In this study, we simulated the growth and metabolism of a community of 10  
813 representative gut species that was previously explored experimentally (45). We  
814 specifically utilized a previously introduced multi-scale framework for modeling the  
815 dynamics and metabolism of multiple microbial species in a well-mixed shared nutrient  
816 environment (42, 70). This framework assumes that each species in the community  
817 aims to maximize its own growth on a short time scale given available nutrients, and  
818 uses Flux Balance Analysis to predict the growth and metabolic activity of each species  
819 at this short time scale (44). The shared environment is then iteratively updated based  
820 on the species' predicted growth, uptake, and secretion rates, such that metabolic

821 interactions are mediated via the environment as a natural byproduct of species  
822 activities, rather than being explicitly modeled (43).

823

824 We used genome-scale metabolic model reconstructions of the 10 community members  
825 from the AGORA collection (38), which have been consistently curated to remove or  
826 modify thermodynamically unfavorable reactions, remove futile cycles, and confirm  
827 growth in anaerobic environments on expected carbon sources, with additional curation  
828 for several biosynthesis pathways. The COBRA toolbox was used to convert each  
829 AGORA model to MATLAB format (71). The growth and metabolism of the 10-species  
830 community were simulated in a chemostat setting in 15-minute time intervals. We set  
831 the chemostat volume to be approximately equal to a mouse gut (0.00134 liter (72)). We  
832 similarly set metabolite inflows to emulate the macronutrient and micronutrient  
833 quantities in a corn-based mouse chow (45) (provided in Supplementary Data 1).

834

835 The simulations were performed following a previously introduced procedure (42),  
836 repeated for each time step  $t_n$ : First, the maximum uptake rate for all metabolites by all  
837 species, denoted as  $v_{jk}$  for metabolite  $j$  and species  $k$ , were calculated based on  
838 Michaelis-Menten single-substrate kinetics, with assumed universal values for maximum  
839 rate  $V_{max}$  and transporter affinity  $K_m$  for all metabolites (provided in Supplementary Data  
840 1).  $v_{jk}$  was further constrained based on an allocation of the metabolite's environmental  
841 concentration to each species in proportion with its biomass. Then, the steady state  
842 reaction fluxes for each species  $k$  at time point  $t_n$  were determined by maximizing the  
843 growth rate  $\mu_k$ , within the obtained constraints on environmental metabolite uptake. To

844 obtain a single and consistent flux solution for each species, the total flux activity for  
845 each species (i.e., the sum of absolute fluxes given the predicted optimal growth rate)  
846 was minimized, under the assumption that organisms prefer to operate their metabolism  
847 with minimal enzymatic cost (73). The optimal flux solutions were solved using linear  
848 programming with GLPK ([www.gnu.org/software/glpk](http://www.gnu.org/software/glpk)). With the resulting flux and  
849 growth rate information, the total biomass of each species  $k$ ,  $bio_k(t_n)$ , was updated for  
850 the next time point  $t_{n+1}$ , using a standard exponential growth function incorporating  
851 dilution:

852

$$853 \quad bio_k(t_{n+1}) = bio_k(t_n)e^{\mu_k\Delta t} - bio_k(t_n)D\Delta t,$$

854

855 where  $D$  is the dilution rate. We set  $D$  to 0.0472 per hour, in order to obtain community  
856 growth rates consistent with the observed average growth rate of the three most  
857 abundant species growing under 47 different carbon conditions (74). The total amount  
858 of uptake or secretion for each species  $k$  and metabolite  $j$  over a single time step was  
859 then calculated as previously derived (42):

860

$$861 \quad m_{FBA}^{jk}(t_n) = \frac{v_{jk}}{\mu_k} * bio_k(t_n)(e^{\mu_k\Delta t} - 1),$$

862

863 where  $v_{jk}$  is the rate of uptake or secretion specified by the FBA solution for that  
864 species and metabolite at that time point,  $\mu_k$  is the species growth rate,  $bio_k(t_n)$  is the  
865 species abundance, and  $\Delta t$  is the size of the time step. Finally, combining the flux  
866 solutions of all species, nutrient inflow, and dilution, along with the steady state



867 assumption of no intracellular metabolite accumulation, the concentration of a given  
868 metabolite in the shared nutrient environment at the next time point,  $M_j(t_{n+1})$  can be  
869 updated as:

870

$$871 \quad M_j(t_{n+1}) = M_j(t_n) + m_{FBA}^j(t_n) + m_{in}^j \Delta t - M_j(t_n) D \Delta t,$$

872

873 where  $m_{FBA}^j(t_n)$  is the metabolic impact from all species considering their abundance  
874 and their uptake and secretion rates of metabolite  $j$ , and  $m_{in}^j$  is the inflow rate of  
875 metabolite  $j$ . This process of calculating uptake rates, Flux Balance Analysis solutions,  
876 and updated metabolite concentrations was then repeated iteratively for the duration of  
877 the simulation.

878

879 Each simulation was run for a period of 144 hours or 576 time steps. This time period  
880 was long enough for most simulation runs to approach a steady state composition:  
881 specifically, in >65% of the simulations analyzed in our study, the change in abundance  
882 in any species over the final 3 hours was less than 0.01% of the carrying capacity (see  
883 below), and all had no changes greater than 0.3% of the capacity over that period. The  
884 concentrations of species and metabolites, the species growth rates, and the solved  
885 rates of all reactions for each species (including uptake and secretion) were recorded in  
886 each step of each simulation and used for subsequent analyses (Supplementary Data 1  
887 and 2).

888

889

## 890 ***Simulation initialization parameters***

891 We fixed the initial total abundances of microbes to the carrying capacity for this system  
892 and media, which was estimated to be 0.433 units of biomass. This capacity was  
893 calculated as the average final total abundance from a set of simulations with varying  
894 compositions and low initial abundances. We then varied the relative abundances,  
895 increasing the abundance of one species at a time at the expense of all other species  
896 equally. Specifically, for each species, we ran simulations in which the ratio of that  
897 species' initial abundance relative to all other species was 2, 3, 4.5, 6, 9, and 13 times  
898 (equating to a range in relative abundance of 10% to 60% for each species). This  
899 resulted in a total of 61 simulation runs (one with all species starting at equal  
900 abundance and 6 with increased abundance of each species). We chose this sample  
901 size to approximately represent the sample sizes of published cross-sectional  
902 microbiome-metabolome association studies (14, 16). We set the initial inflow  
903 concentrations to the amount that would dilute in over one hour under the calculated  
904 inflow rates.

905

## 906 ***Comparison with Shapley values***

907 We implemented an approximate Shapley value algorithm (41) as an alternative  
908 strategy to calculate contributions for the simulated dataset. Briefly, 15,000 random  
909 orderings of the 10 species were randomly generated. For each ordering, the variance  
910 in metabolite activity is calculated for subsets of size 1 to 10, adding in species  
911 according to the specified ordering. The difference in variance as a given species is  
912 added to the subset, denoting the *marginal* contribution of that species to variation, is

913 recorded. The average marginal contribution across all orderings for each species is  
914 then defined as its contribution to variance.

915

### 916 ***Species-metabolite correlation analysis***

917 We calculated Spearman correlations between absolute species abundances  
918 (quantified as total biomass) and concentrations of variable metabolites. We used  
919 absolute abundances in order to evaluate the relationships between species and  
920 metabolites under the hypothetically best possible measurements of both data types.  
921 We also compared correlation results using relative abundances and found very  
922 minimal differences in the main simulation dataset: only 7 species-metabolite pairs  
923 (1.3%) are significantly correlated using absolute abundances but not relative, and only  
924 4 pairs (0.8%) are correlated using relative abundances but not absolute.

925

926 We used a  $p$ -value threshold of 0.01 to classify “significant” associations for binary  
927 comparisons. For interpretability, we refer to  $p$ -values not corrected for multiple  
928 hypothesis testing, since the number of tests remained constant across nearly all of our  
929 analyses (520 possible species-metabolite pairs). The 0.01 threshold we use to define  
930 significantly correlated pairs is equivalent to a Benjamini-Hochberg corrected  $q$ -value  
931 threshold of 0.08, calculated using the R package *qvalue* (75).

932

### 933 ***Logistic regression modeling of correlation outcomes***

934 We used logistic regression models to identify factors that can be used to predict

935 whether a non-contributing species-metabolite pair displays a significant correlation  
936 (false positive), and whether a key contributor species-metabolite pair fails to be  
937 correlated (false negative). We used the *glm* function in R to fit models of the log odds  
938 of whether a non-contributing species is correlated with its corresponding metabolite  
939 (false positive or true negative), using as predictors grouped indicator values for species  
940 and metabolite identities. We separately fit another set of logistic regression models to  
941 predict whether a key contributor species is correlated (true positive or false negative),  
942 with the same predictors. Models were compared using likelihood ratio tests using the  
943 *anova* function in R.

944

#### 945 ***Simulations with varied inflow quantities***

946 We ran 8 additional sets of simulations with the same set of 61 different initial species  
947 compositions but with varying degrees of inflow fluctuations. Specifically, the nutrient  
948 inflow quantities were sampled independently from a normal distribution, with a mean of  
949 the original inflow concentration and the standard deviation equal to a set percent of the  
950 mean. The 8 levels of deviation were 0.5%, 1%, 2%, 3%, 4%, 5%, 8%, or 10%. In the  
951 comparison of correlation results across samples, we evaluated the same set of 52  
952 variable metabolites as for the original dataset for consistency, although given the  
953 added noise, additional metabolites met the same variance cutoff we used to define  
954 variable metabolites.

955

956 To evaluate correlation performance as a function of increasing environmental  
957 contribution, we binned the 38 analyzed inflow metabolites across the 8 datasets based

958 on the size of the environmental contribution to variance for the metabolite in that  
959 dataset. In other words, metabolites in any dataset with an environmental contribution  
960 greater than 0 but less than 10% of the total positive variance contributions were binned  
961 into a single category, those with an environmental contribution between 10% and 20%  
962 were binned into the next category, and so on. We analyzed the 52 metabolites in the  
963 original constant-environment dataset as a separate category, and did the same for the  
964 14 non-inflow metabolites in each of the 8 environmentally-varying datasets.

965

966 Confidence intervals for AUC values were calculated using the *pROC* package in R  
967 (76), using a bootstrap method with 500 resamplings.

968

### 969 ***Application of MIMOSA to simulated data and comparison with correlation*** 970 ***analysis***

971 We applied MIMOSA v1.0.2 ([github.com/borenstein-lab/MIMOSA](https://github.com/borenstein-lab/MIMOSA)) (56) to the obtained  
972 set of metabolite and species abundances. To construct the community metabolic  
973 network model required by MIMOSA, we merged the 10 species-level models used in  
974 the simulations into a single stoichiometric matrix. If a reversible reaction only ever  
975 proceeded in a single direction in any simulation, we encoded it as non-reversible. To  
976 apply the KEGG-based version of MIMOSA, we converted the model metabolite IDs to  
977 KEGG IDs (55), downloaded KEGG Orthology gene annotations for the 10 modeled  
978 species from the IMG/M database (77), and ran a MIMOSA analysis using the KEGG  
979 metabolic network model encoded in *reaction\_mapformula.lst* (KEGG version  
980 downloaded 2-2018).

981

982 ***Code and data availability***

983 Code for all the analyses presented in this study is available online in the form of R  
984 notebooks at <https://github.com/borenstein-lab/microbiome-metabolome-evaluation>. All  
985 data generated and analyzed in this study and displayed in the figures are included in  
986 Supplementary Data 1 through 3.

987

## 988 **Author contributions**

989 C.N. and E.B. designed the study and wrote the paper. C.N. performed the analysis.

990 H.C.C. and C.P.M. contributed to the multi-species metabolic modeling simulations. All

991 authors read and approved the paper.

992

## 993 **Acknowledgements**

994 C.N. was supported in part by a National Science Foundation (NSF) IGERT DGE-

995 1258485 fellowship. C.P.M. was funded by NHGRI grant T32 HG000035. This work was

996 supported in part by NIH New Innovator Award DP2 AT007802–01 and NIH grant

997 1R01GM124312–01 to E.B.

998

## 999 **References**

- 1000 1. Hazen TC, Dubinsky EA, DeSantis TZ, Andersen GL, Piceno YM, Singh N, Jansson  
1001 JK, Probst A, Borglin SE, Fortney JL, Stringfellow WT, Bill M, Conrad ME, Tom LM,  
1002 Chavarria KL, Alusi TR, Lamendella R, Joyner DC, Spier C, Baelum J, Auer M,  
1003 Zemla ML, Chakraborty R, Sonnenthal EL, D'haeseleer P, Holman H-YN, Osman  
1004 S, Lu Z, Van Nostrand JD, Deng Y, Zhou J, Mason OU. 2010. Deep-Sea Oil Plume  
1005 Enriches Indigenous Oil-Degrading Bacteria. *Science* 330:204–208.
- 1006 2. Shi W, Moon C, Leahy S, Kang D, Froula J, Kittelmann S, Fan C, Deutsch S, Gagic  
1007 D, Seedorf H, Kelly W, Atua R, Sang C, Soni P, Li D, Pinares-Patiño C, McEwan J,  
1008 Janssen P, Chen F, Visel A, Wang Z, Attwood G, Rubin E. 2014. Methane yield  
1009 phenotypes linked to differential gene expression in the sheep rumen microbiome.  
1010 *Genome Res* gr.168245.113.
- 1011 3. Koeth RA, Wang Z, Levison BS, Buffa JA, Org E, Sheehy BT, Britt EB, Fu X, Wu Y,  
1012 Li L, Smith JD, DiDonato JA, Chen J, Li H, Wu GD, Lewis JD, Warrier M, Brown  
1013 JM, Krauss RM, Tang WHW, Bushman FD, Lusk AJ, Hazen SL. 2013. Intestinal  
1014 microbiota metabolism of L-carnitine, a nutrient in red meat, promotes  
1015 atherosclerosis. *Nat Med* 19:576–585.
- 1016 4. Hsiao EY, McBride SW, Hsien S, Sharon G, Hyde ER, McCue T, Codelli JA, Chow  
1017 J, Reisman SE, Petrosino JF, Patterson PH, Mazmanian SK. 2013. Microbiota  
1018 Modulate Behavioral and Physiological Abnormalities Associated with  
1019 Neurodevelopmental Disorders. *Cell* 155:1451–1463.



- 1020 5. Dumas M-E, Barton RH, Toye A, Cloarec O, Blancher C, Rothwell A, Fearnside J,  
1021 Tatoud R, Blanc V, Lindon JC, Mitchell SC, Holmes E, McCarthy MI, Scott J,  
1022 Gauguier D, Nicholson JK. 2006. Metabolic profiling reveals a contribution of gut  
1023 microbiota to fatty liver phenotype in insulin-resistant mice. *Proc Natl Acad Sci*  
1024 103:12511–12516.
- 1025 6. Louis P, Hold GL, Flint HJ. 2014. The gut microbiota, bacterial metabolites and  
1026 colorectal cancer. *Nat Rev Microbiol* 12:661–672.
- 1027 7. Wlodarska M, Luo C, Kolde R, d’Hennezel E, Annand JW, Heim CE, Krastel P,  
1028 Schmitt EK, Omar AS, Creasey EA, Garner AL, Mohammadi S, O’Connell DJ,  
1029 Abubucker S, Arthur TD, Franzosa EA, Huttenhower C, Murphy LO, Haiser HJ,  
1030 Vlamakis H, Porter JA, Xavier RJ. 2017. Indoleacrylic Acid Produced by  
1031 Commensal *Peptostreptococcus* Species Suppresses Inflammation. *Cell Host*  
1032 *Microbe* 22:25-37.e6.
- 1033 8. Ferreyra JA, Wu KJ, Hryckowian AJ, Bouley DM, Weimer BC, Sonnenburg JL. 2014.  
1034 Gut Microbiota-Produced Succinate Promotes *C. difficile* Infection after Antibiotic  
1035 Treatment or Motility Disturbance. *Cell Host Microbe* 16:770–777.
- 1036 9. Rath S, Heidrich B, Pieper DH, Vital M. 2017. Uncovering the trimethylamine-  
1037 producing bacteria of the human gut microbiota. *Microbiome* 5.
- 1038 10. David LA, Maurice CF, Carmody RN, Gootenberg DB, Button JE, Wolfe BE, Ling  
1039 AV, Devlin AS, Varma Y, Fischbach MA, Biddinger SB, Dutton RJ, Turnbaugh PJ.

- 1040 2013. Diet rapidly and reproducibly alters the human gut microbiome. *Nature*  
1041 505:559–563.
- 1042 11. De Filippis F, Pellegrini N, Vannini L, Jeffery IB, La Stora A, Laghi L, Serrazanetti  
1043 DI, Di Cagno R, Ferrocino I, Lazzi C, Turrone S, Cocolin L, Brigidi P, Neviani E,  
1044 Gobbetti M, O'Toole PW, Ercolini D. 2015. High-level adherence to a  
1045 Mediterranean diet beneficially impacts the gut microbiota and associated  
1046 metabolome. *Gut* gutjnl-2015-309957.
- 1047 12. Snijders AM, Langley SA, Kim Y-M, Brislawn CJ, Noecker C, Zink EM, Fansler SJ,  
1048 Casey CP, Miller DR, Huang Y, Karpen GH, Celniker SE, Brown JB, Borenstein E,  
1049 Jansson JK, Metz TO, Mao J-H. 2016. Influence of early life exposure, host  
1050 genetics and diet on the mouse gut microbiome and metabolome. *Nat Microbiol*  
1051 2:16221.
- 1052 13. Shaffer M, Armstrong AJS, Phelan VV, Reisdorph N, Lozupone CA. 2017.  
1053 Microbiome and metabolome data integration provides insight into health and  
1054 disease. *Transl Res*.
- 1055 14. Srinivasan S, Morgan MT, Fiedler TL, Djukovic D, Hoffman NG, Raftery D,  
1056 Marrazzo JM, Fredricks DN. 2015. Metabolic Signatures of Bacterial Vaginosis.  
1057 *mBio* 6:e00204-15.
- 1058 15. Theriot CM, Koenigsnecht MJ, Carlson Jr PE, Hatton GE, Nelson AM, Li B,  
1059 Huffnagle GB, Z. Li J, Young VB. 2014. Antibiotic-induced shifts in the mouse gut

- 1060 microbiome and metabolome increase susceptibility to *Clostridium difficile*  
1061 infection. *Nat Commun* 5.
- 1062 16. Califf KJ, Schwarzberg-Lipson K, Garg N, Gibbons SM, Caporaso JG, Slots J,  
1063 Cohen C, Dorrestein PC, Kelley ST. 2017. Multi-omics Analysis of Periodontal  
1064 Pocket Microbial Communities Pre- and Posttreatment. *mSystems* 2:e00016-17.
- 1065 17. Garg N, Wang M, Hyde E, da Silva RR, Melnik AV, Protsyuk I, Bouslimani A, Lim  
1066 YW, Wong R, Humphrey G, Ackermann G, Spivey T, Brouha SS, Bandeira N, Lin  
1067 GY, Rohwer F, Conrad DJ, Alexandrov T, Knight R, Dorrestein PC. 2017. Three-  
1068 Dimensional Microbiome and Metabolome Cartography of a Diseased Human  
1069 Lung. *Cell Host Microbe*.
- 1070 18. Antharam VC, McEwen DC, Garrett TJ, Dossey AT, Li EC, Kozlov AN, Mesbah Z,  
1071 Wang GP. 2016. An Integrated Metabolomic and Microbiome Analysis Identified  
1072 Specific Gut Microbiota Associated with Fecal Cholesterol and Coprostanol in  
1073 *Clostridium difficile* Infection. *PLoS ONE* 11:e0148824.
- 1074 19. Heintz-Buschart A, May P, Laczny CC, Lebrun LA, Bellora C, Krishna A, Wampach  
1075 L, Schneider JG, Hogan A, de Beaufort C, Wilmes P. 2016. Integrated multi-omics  
1076 of the human gut microbiome in a case study of familial type 1 diabetes. *Nat*  
1077 *Microbiol* 2:16180.
- 1078 20. Hua C, Tian J, Tian P, Cong R, Luo Y, Geng Y, Tao S, Ni Y, Zhao R. 2017.  
1079 Feeding a High Concentration Diet Induces Unhealthy Alterations in the

- 1080           Composition and Metabolism of Ruminal Microbiota and Host Response in a Goat  
1081           Model. *Front Microbiol* 8.
- 1082   21. Price ND, Magis AT, Earls JC, Glusman G, Levy R, Lausted C, McDonald DT,  
1083           Kusebauch U, Moss CL, Zhou Y, Qin S, Moritz RL, Brogaard K, Omenn GS,  
1084           Lovejoy JC, Hood L. 2017. A wellness study of 108 individuals using personal,  
1085           dense, dynamic data clouds. *Nat Biotechnol*.
- 1086   22. Vandeputte D, Falony G, Vieira-Silva S, Wang J, Sailer M, Theis S, Verbeke K,  
1087           Raes J. 2017. Prebiotic inulin-type fructans induce specific changes in the human  
1088           gut microbiota. *Gut* 66:1968–1974.
- 1089   23. Walsh AM, Crispie F, Kilcawley K, O’Sullivan O, O’Sullivan MG, Claesson MJ,  
1090           Cotter PD. 2016. Microbial Succession and Flavor Production in the Fermented  
1091           Dairy Beverage Kefir. *mSystems* 1:e00052-16.
- 1092   24. Weir TL, Manter DK, Sheflin AM, Barnett BA, Heuberger AL, Ryan EP. 2013. Stool  
1093           Microbiome and Metabolome Differences between Colorectal Cancer Patients and  
1094           Healthy Adults. *PLoS ONE* 8:e70803.
- 1095   25. Alivisatos AP, Blaser MJ, Brodie EL, Chun M, Dangl JL, Donohue TJ, Dorrestein  
1096           PC, Gilbert JA, Green JL, Jansson JK, Knight R, Maxon ME, McFall-Ngai MJ, Miller  
1097           JF, Pollard KS, Ruby EG, Taha SA, Unified Microbiome Initiative Consortium.  
1098           2015. A unified initiative to harness Earth’s microbiomes. *Science* 350:507–508.

- 1099 26. iHMP Research Network Consortium. 2014. The Integrative Human Microbiome  
1100 Project: Dynamic Analysis of Microbiome-Host Omics Profiles during Periods of  
1101 Human Health and Disease. *Cell Host Microbe* 16:276–289.
- 1102 27. Choo JM, Kanno T, Zain NMM, Leong LEX, Abell GCJ, Keeble JE, Bruce KD,  
1103 Mason AJ, Rogers GB. 2017. Divergent Relationships between Fecal Microbiota  
1104 and Metabolome following Distinct Antibiotic-Induced Disruptions. *mSphere*  
1105 2:e00005-17.
- 1106 28. Kang D-W, Ilhan ZE, Isern NG, Hoyt DW, Howsmon DP, Shaffer M, Lozupone CA,  
1107 Hahn J, Adams JB, Krajmalnik-Brown R. 2018. Differences in fecal microbial  
1108 metabolites and microbiota of children with autism spectrum disorders. *Anaerobe*  
1109 49:121–131.
- 1110 29. Lin Z, Ye W, Zu X, Xie H, Li H, Li Y, Zhang W. 2018. Integrative metabolic and  
1111 microbial profiling on patients with Spleen-yang-deficiency syndrome. *Sci Rep* 8.
- 1112 30. Melnik AV, da Silva RR, Hyde ER, Aksenov AA, Vargas F, Bouslimani A, Protsyuk  
1113 I, Jarmusch AK, Tripathi A, Alexandrov T, Knight R, Dorrestein PC. 2017. Coupling  
1114 Targeted and Untargeted Mass Spectrometry for Metabolome-Microbiome-Wide  
1115 Association Studies of Human Fecal Samples. *Anal Chem* 89:7549–7559.
- 1116 31. Chong J, Xia J. 2017. Computational Approaches for Integrative Analysis of the  
1117 Metabolome and Microbiome. *Metabolites* 7:62.
- 1118 32. Hoyles L, Jiménez-Pranteda ML, Chilloux J, Brial F, Myridakis A, Aranas T,  
1119 Magnan C, Gibson GR, Sanderson JD, Nicholson JK, Gauguier D, McCartney AL,

- 1120 Dumas M-E. 2018. Metabolic retroconversion of trimethylamine N-oxide and the  
1121 gut microbiota. *Microbiome* 6.
- 1122 33. Biggs MB, Medlock GL, Moutinho TJ, Lees HJ, Swann JR, Kolling GL, Papin JA.  
1123 2016. Systems-level metabolism of the altered Schaedler flora, a complete gut  
1124 microbiota. *ISME J*.
- 1125 34. Kešnerová L, Mars RAT, Ellegaard KM, Troilo M, Sauer U, Engel P. 2017.  
1126 Disentangling metabolic functions of bacteria in the honey bee gut. *PLOS Biol*  
1127 15:e2003467.
- 1128 35. Bauer E, Zimmermann J, Baldini F, Thiele I, Kaleta C. 2017. BacArena: Individual-  
1129 based metabolic modeling of heterogeneous microbes in complex communities.  
1130 *PLOS Comput Biol* 13:e1005544.
- 1131 36. Garza DR, van Verk MC, Huynen MA, Dutilh BE. 2018. Towards predicting the  
1132 environmental metabolome from metagenomics with a mechanistic model. *Nat*  
1133 *Microbiol*.
- 1134 37. Heinken A, Thiele I. 2015. Anoxic conditions promote species-specific mutualism  
1135 between gut microbes in silico. *Appl Environ Microbiol* AEM.00101-15.
- 1136 38. Magnúsdóttir S, Heinken A, Kutt L, Ravcheev DA, Bauer E, Noronha A,  
1137 Greenhalgh K, Jäger C, Baginska J, Wilmes P, Fleming RMT, Thiele I. 2016.  
1138 Generation of genome-scale metabolic reconstructions for 773 members of the  
1139 human gut microbiota. *Nat Biotechnol*.

- 1140 39. Shoaie S, Ghaffari P, Kovatcheva-Datchary P, Mardinoglu A, Sen P, Pujos-Guillot  
1141 E, de Wouters T, Juste C, Rizkalla S, Chilloux J, Hoyles L, Nicholson JK, Dore J,  
1142 Dumas ME, Clement K, Bäckhed F, Nielsen J. 2015. Quantifying Diet-Induced  
1143 Metabolic Changes of the Human Gut Microbiome. *Cell Metab* 22:320–331.
- 1144 40. Shapley LS. 1953. 17. A Value for n-Person Games, p. . *In* Kuhn, HW, Tucker, AW  
1145 (eds.), *Contributions to the Theory of Games (AM-28)*, Volume II. Princeton  
1146 University Press, Princeton.
- 1147 41. Manor O, Borenstein E. 2017. Systematic Characterization and Analysis of the  
1148 Taxonomic Drivers of Functional Shifts in the Human Microbiome. *Cell Host*  
1149 *Microbe* 21:254–267.
- 1150 42. Chiu H-C, Levy R, Borenstein E. 2014. Emergent Biosynthetic Capacity in Simple  
1151 Microbial Communities. *PLoS Comput Biol* 10:e1003695.
- 1152 43. Manor O, Levy R, Borenstein E. 2014. Mapping the Inner Workings of the  
1153 Microbiome: Genomic- and Metagenomic-Based Study of Metabolism and  
1154 Metabolic Interactions in the Human Microbiome. *Cell Metab* 20:742–752.
- 1155 44. Varma A, Palsson BO. 1994. Metabolic Flux Balancing: Basic Concepts, Scientific  
1156 and Practical Use. *Bio/Technology* 12:994–998.
- 1157 45. Faith JJ, McNulty NP, Rey FE, Gordon JI. 2011. Predicting a Human Gut  
1158 Microbiota’s Response to Diet in Gnotobiotic Mice. *Science* 333:101–104.

- 1159 46. Rivière A, Gagnon M, Weckx S, Roy D, De Vuyst L. 2015. Mutual Cross-Feeding  
1160 Interactions between *Bifidobacterium longum* subsp. *longum* NCC2705 and  
1161 *Eubacterium rectale* ATCC 33656 Explain the Bifidogenic and Butyrogenic Effects  
1162 of Arabinoxylan Oligosaccharides. *Appl Environ Microbiol* 81:7767–7781.
- 1163 47. Unterseher M, Jumpponen A, öPik M, Tedersoo L, Moora M, Dormann CF,  
1164 Schnittler M. 2011. Species abundance distributions and richness estimations in  
1165 fungal metagenomics - lessons learned from community ecology: COMMUNITY  
1166 ECOLOGY IN FUNGAL METAGENOMICS. *Mol Ecol* 20:275–285.
- 1167 48. Mee MT, Collins JJ, Church GM, Wang HH. 2014. Syntrophic exchange in  
1168 synthetic microbial communities. *Proc Natl Acad Sci* 111:E2149–E2156.
- 1169 49. McHardy IH, Goudarzi M, Tong M, Ruegger PM, Schwager E, Weger JR, Graeber  
1170 TG, Sonnenburg JL, Horvath S, Huttenhower C, McGovern DP, Fornace AJ,  
1171 Borneman J. 2013. Integrative analysis of the microbiome and metabolome of the  
1172 human intestinal mucosal surface reveals exquisite inter-relationships. *Microbiome*  
1173 1:17.
- 1174 50. Weiss S, Van Treuren W, Lozupone C, Faust K, Friedman J, Deng Y, Xia LC, Xu  
1175 ZZ, Ursell L, Alm EJ, Birmingham A, Cram JA, Fuhrman JA, Raes J, Sun F, Zhou  
1176 J, Knight R. 2016. Correlation detection strategies in microbial data sets vary  
1177 widely in sensitivity and precision. *ISME J* 10:1669–1681.



- 1178 51. Werhli AV, Grzegorzczak M, Husmeier D. 2006. Comparative evaluation of reverse  
1179 engineering gene regulatory networks with relevance networks, graphical gaussian  
1180 models and bayesian networks. *Bioinformatics* 22:2523–2531.
- 1181 52. Gilbert JA, Quinn RA, Debelius J, Xu ZZ, Morton J, Garg N, Jansson JK, Dorrestein  
1182 PC, Knight R. 2016. Microbiome-wide association studies link dynamic microbial  
1183 consortia to disease. *Nature* 535:94–103.
- 1184 53. Langille MGI, Zaneveld J, Caporaso JG, McDonald D, Knights D, Reyes JA,  
1185 Clemente JC, Burkepille DE, Vega Thurber RL, Knight R, Beiko RG, Huttenhower  
1186 C. 2013. Predictive functional profiling of microbial communities using 16S rRNA  
1187 marker gene sequences. *Nat Biotechnol* 31:814–821.
- 1188 54. Caspi R, Altman T, Billington R, Dreher K, Foerster H, Fulcher CA, Holland TA,  
1189 Keseler IM, Kothari A, Kubo A, Krummenacker M, Latendresse M, Mueller LA, Ong  
1190 Q, Paley S, Subhraveti P, Weaver DS, Weerasinghe D, Zhang P, Karp PD. 2014.  
1191 The MetaCyc database of metabolic pathways and enzymes and the BioCyc  
1192 collection of Pathway/Genome Databases. *Nucleic Acids Res* 42:D459–D471.
- 1193 55. Kanehisa M, Goto S. 2000. KEGG: kyoto encyclopedia of genes and genomes.  
1194 *Nucleic Acids Res* 28:27–30.
- 1195 56. Noecker C, Eng A, Srinivasan S, Theriot CM, Young VB, Jansson JK, Fredricks  
1196 DN, Borenstein E. 2016. Metabolic Model-Based Integration of Microbiome  
1197 Taxonomic and Metabolomic Profiles Elucidates Mechanistic Links between  
1198 Ecological and Metabolic Variation. *mSystems* 1:e00013-15.

- 1199 57. Casero D, Gill K, Sridharan V, Koturbash I, Nelson G, Hauer-Jensen M, Boerma M,  
1200 Braun J, Cheema AK. 2017. Space-type radiation induces multimodal responses in  
1201 the mouse gut microbiome and metabolome. *Microbiome* 5.
- 1202 58. Stewart CJ, Mansbach JM, Wong MC, Ajami NJ, Petrosino JF, Camargo CA,  
1203 Hasegawa K. 2017. Associations of Nasopharyngeal Metabolome and Microbiome  
1204 with Severity among Infants with Bronchiolitis. A Multiomic Analysis. *Am J Respir*  
1205 *Crit Care Med* 196:882–891.
- 1206 59. Franzosa EA, Morgan XC, Segata N, Waldron L, Reyes J, Earl AM, Giannoukos G,  
1207 Boylan MR, Ciulla D, Gevers D, Izard J, Garrett WS, Chan AT, Huttenhower C.  
1208 2014. Relating the metatranscriptome and metagenome of the human gut. *Proc*  
1209 *Natl Acad Sci* 111:E2329–E2338.
- 1210 60. Iwai S, Weinmaier T, Schmidt BL, Albertson DG, Poloso NJ, Dabbagh K, DeSantis  
1211 TZ. 2016. Piphillin: Improved Prediction of Metagenomic Content by Direct  
1212 Inference from Human Microbiomes. *PLOS ONE* 11:e0166104.
- 1213 61. Magnúsdóttir S, Thiele I. 2018. Modeling metabolism of the human gut microbiome.  
1214 *Curr Opin Biotechnol* 51:90–96.
- 1215 62. Doledec S, Chessel D. 1994. Co-inertia analysis: an alternative method for  
1216 studying species-environment relationships. *Freshw Biol* 31:277–294.
- 1217 63. Randolph TW, Zhao S, Copeland W, Hullar M, Shojaie A. 2015. Kernel-Penalized  
1218 Regression for Analysis of Microbiome Data. *ArXiv151100297 Stat*.

- 1219 64. Zhu J, Sova P, Xu Q, Dombek KM, Xu EY, Vu H, Tu Z, Brem RB, Bumgarner RE,  
1220 Schadt EE. 2012. Stitching together Multiple Data Dimensions Reveals Interacting  
1221 Metabolomic and Transcriptomic Networks That Modulate Cell Regulation. *PLoS*  
1222 *Biol* 10:e1001301.
- 1223 65. Berry D, Stecher B, Schintlmeister A, Reichert J, Brugiroux S, Wild B, Wanek W,  
1224 Richter A, Rauch I, Decker T, Loy A, Wagner M. 2013. Host-compound foraging by  
1225 intestinal microbiota revealed by single-cell stable isotope probing. *Proc Natl Acad*  
1226 *Sci* 110:4720–4725.
- 1227 66. Kurczyk ME, Forsberg EM, Thorgersen MP, Poole FL, Benton HP, Ivanisevic J, Tran  
1228 ML, Wall JD, Elias DA, Adams MWW, Siuzdak G. 2016. Global Isotope  
1229 Metabolomics Reveals Adaptive Strategies for Nitrogen Assimilation. *ACS Chem*  
1230 *Biol* 11:1677–1685.
- 1231 67. Turnbaugh PJ, Gordon JI. 2008. An Invitation to the Marriage of Metagenomics and  
1232 Metabolomics. *Cell* 134:708–713.
- 1233 68. Collins WD, Bitz CM, Blackmon ML, Bonan GB, Bretherton CS, Carton JA, Chang  
1234 P, Doney SC, Hack JJ, Henderson TB, Kiehl JT, Large WG, McKenna DS, Santer  
1235 BD, Smith RD. 2006. The Community Climate System Model Version 3 (CCSM3). *J*  
1236 *Clim* 19:2122–2143.
- 1237 69. Connolly AJ, Angeli GZ, Chandrasekharan S, Claver CF, Cook K, Ivezic Z, Jones  
1238 RL, Krughoff KS, Peng E-H, Peterson J, Petry C, Rasmussen AP, Ridgway ST,  
1239 Saha A, Sembroski G, vanderPlas J, Yoachim P. 2014. An end-to-end simulation

- 1240 framework for the Large Synoptic Survey Telescope, p. 915014. *In* Angeli, GZ,  
1241 Dierickx, P (eds.), .
- 1242 70. McNally CP, Borenstein E. 2018. Metabolic model-based analysis of the  
1243 emergence of bacterial cross-feeding via extensive gene loss. *BMC Syst Biol* 12.
- 1244 71. Schellenberger J, Que R, Fleming RMT, Thiele I, Orth JD, Feist AM, Zielinski DC,  
1245 Bordbar A, Lewis NE, Rahmanian S, Kang J, Hyduke DR, Palsson BØ. 2011.  
1246 Quantitative prediction of cellular metabolism with constraint-based models: the  
1247 COBRA Toolbox v2.0. *Nat Protoc* 6:1290–1307.
- 1248 72. Casteleyn C, Rekecki A, Van der Aa A, Simoens P, Van den Broeck W. 2010.  
1249 Surface area assessment of the murine intestinal tract as a prerequisite for oral  
1250 dose translation from mouse to man. *Lab Anim* 44:176–183.
- 1251 73. Holzhütter H-G. 2004. The principle of flux minimization and its application to  
1252 estimate stationary fluxes in metabolic networks: Flux minimization. *Eur J Biochem*  
1253 271:2905–2922.
- 1254 74. McNulty NP, Wu M, Erickson AR, Pan C, Erickson BK, Martens EC, Pudlo N a,  
1255 Muegge BD, Henrissat B, Hettich RL, Gordon JI. 2013. Effects of diet on resource  
1256 utilization by a model human gut microbiota containing *Bacteroides cellulosilyticus*  
1257 WH2, a symbiont with an extensive glycobiome. *PLoS Biol* 11:e1001637.
- 1258 75. Dabney A, Storey JD. 2015. qvalue: Q-value estimation for false discovery rate  
1259 control.

- 1260 76. Robin X, Turck N, Hainard A, Tiberti N, Lisacek F, Sanchez J-C, Müller M. 2011.  
1261 pROC: an open-source package for R and S+ to analyze and compare ROC  
1262 curves. *BMC Bioinformatics* 12:77.
- 1263 77. Markowitz VM, Chen I-MA, Palaniappan K, Chu K, Szeto E, Grechkin Y, Ratner A,  
1264 Jacob B, Huang J, Williams P, Huntemann M, Anderson I, Mavromatis K, Ivanova  
1265 NN, Kyrpides NC. 2012. IMG: the integrated microbial genomes database and  
1266 comparative analysis system. *Nucleic Acids Res* 40:D115–D122.  
1267

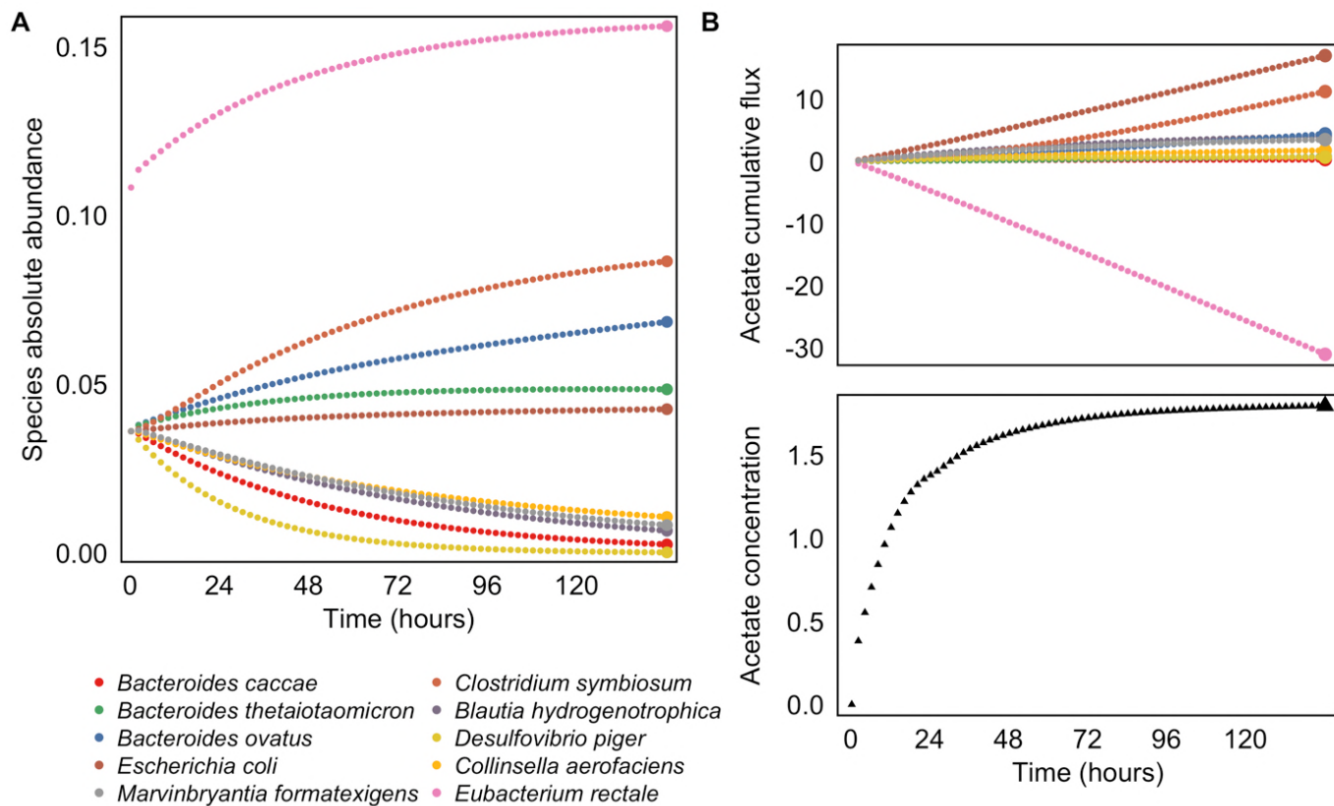

**Figure 1. Simulating multi-omic data with a dynamic multi-species genome-scale framework. (A)**

Community species abundances throughout a single simulation run. Abundances were quantified in units of microbial biomass. In this simulation, community composition was initialized with a high relative abundance of *Eubacterium rectale*. For visual clarity, only every eighth time step is illustrated. Species abundances at the final time point (highlighted with larger colored circles) were used for calculating species-metabolite correlations. **(B)** Cumulative secretion and uptake of acetate by each community member, throughout the same simulation run illustrated in panel A. Acetate was synthesized by several species and consumed by *E. rectale* over the course of the simulation. Total cumulative fluxes (highlighted with larger colored circles) were used for calculating species contributions to metabolite variation. The bottom plot illustrates the resulting environmental concentration of acetate at each time point. The metabolite concentration at the final time point (highlighted with a larger black triangle) was used for calculating species-metabolite correlations.

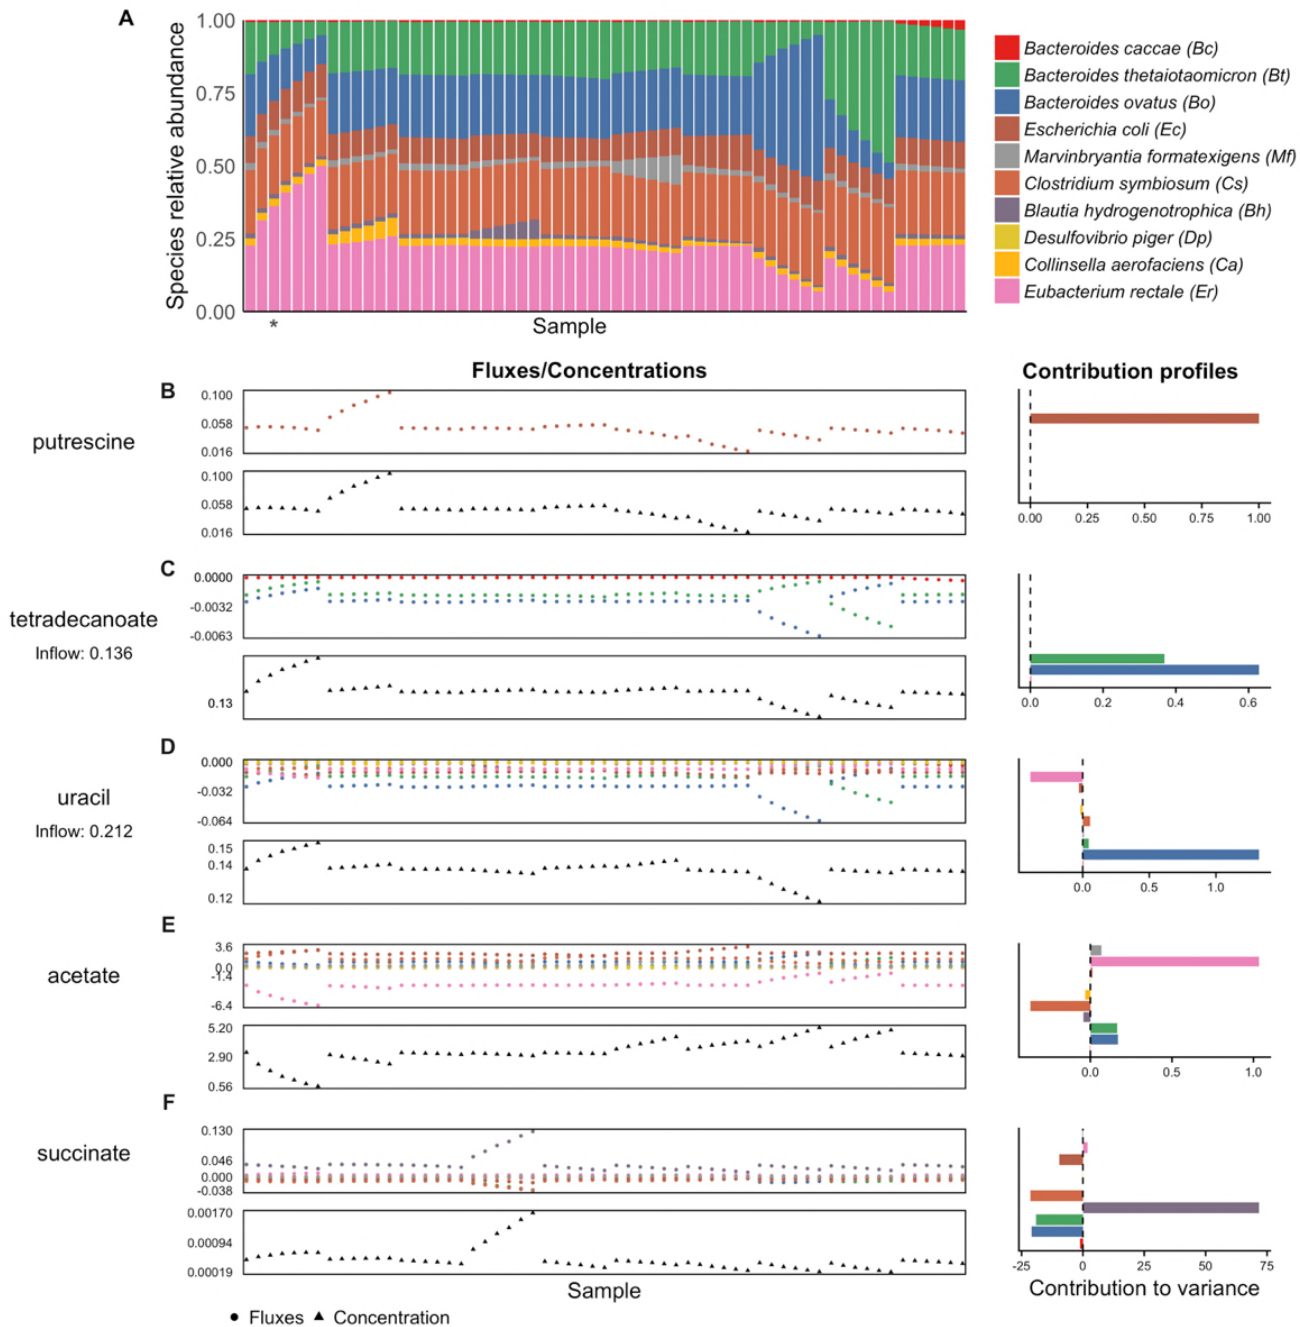

**Figure 2. Species abundances, cumulative fluxes, and contributions to variance in metabolite concentrations in our simulated dataset.** (A) The dataset of species abundances at the final time point of 61 simulation runs. Each bar represents a simulation run, with the colors indicating relative abundance of each species. The abundance profile from the simulation runs highlighted in Figure 1 is indicated with an asterisk. (B-F) For five example metabolites, the upper plot shows the total cumulative secretion or uptake of that metabolite by each species across all 61 simulation runs (or samples). The lower plot shows the corresponding environmental concentration at the final time point. The bar plot on the right shows the contribution values for each species and metabolite, calculated from the flux values and describing each species' linear contribution to the overall metabolite variance.

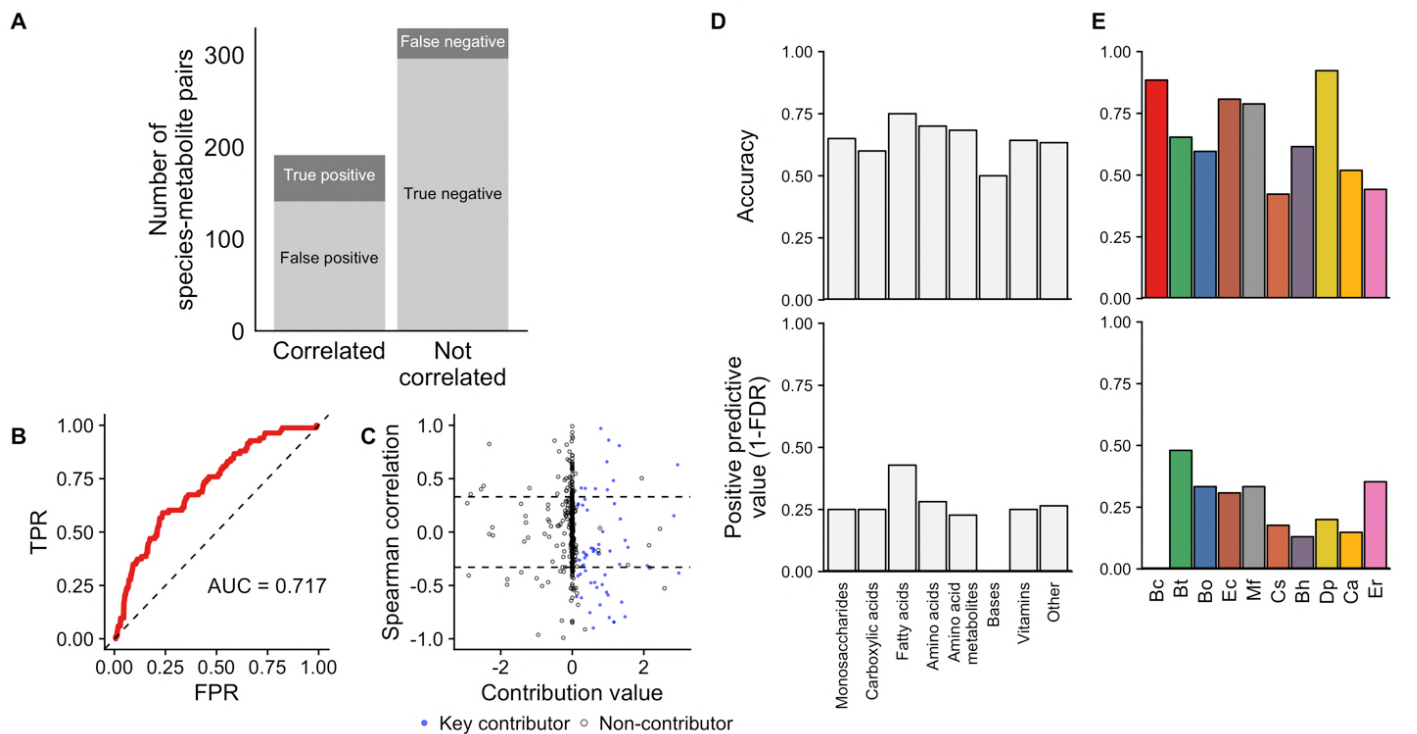

**Figure 3. Species-metabolite correlations poorly predict species contributions to metabolite**

**variation.** **(A)** The number of species-metabolites pairs that were significantly correlated (left bar) or not-correlated (right bar) and its correspondence with true species-metabolite key contributors (indicated by shade of gray). **(B)** Receiver operating characteristic (ROC) plot, showing the ability of absolute Spearman correlation values to classify key contributors among all species-metabolite pairs. **(C)** Scatter plot of species-metabolite pairs, showing the poor correspondence between true contribution values (x-axis) and Spearman correlation (y-axis). Key contributors are plotted as blue points, others as hollow circles. Dashed lines show significant correlations ( $p < 0.01$ ). There are 65 species-metabolite pairs with a contribution value greater than 3 in magnitude whose values are not shown. **(D-E)** Accuracy and positive predictive value of Spearman correlation analysis for detecting true key contributors across metabolite classes (Panel D) and for each of the 10 species (Panel E).



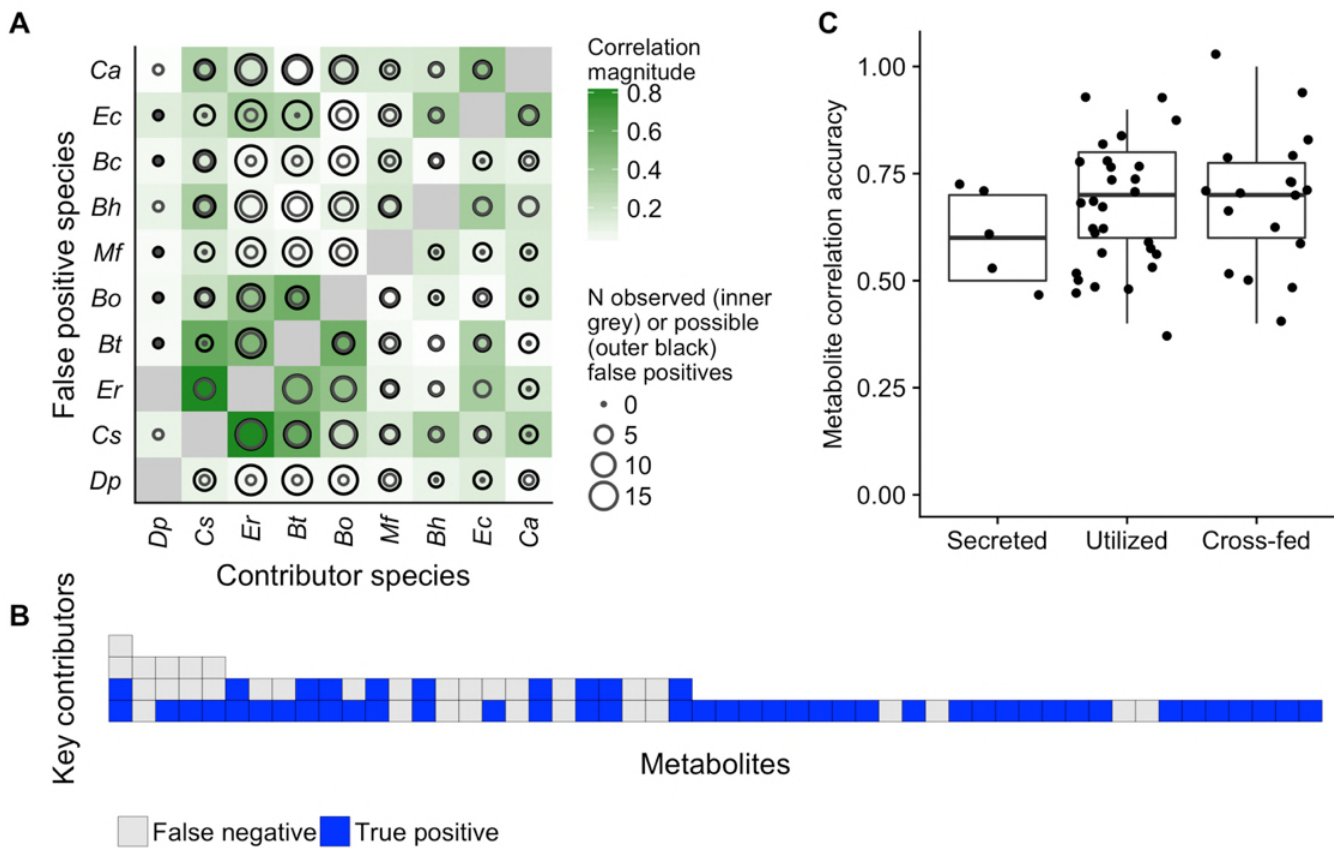

**Figure 4. Metabolite and species properties explain correlation-contribution discrepancies. (A)** Strongly correlated species pairs produced more false positive metabolite correlations. In this plot, the color of each tile indicates the strength of correlation in the abundances of each pair of species. The size of the outer black circle in each cell represents the number of metabolites for which the species on the x-axis is a key contributor and the species on the y-axis is not. The size of the inner circle represents the share of those metabolites for which a false positive is observed for the species on the y-axis. It can be seen that many false positive correlations involve the taxa with the strongest interspecies associations: *E. rectale*, *B. ovatus*, and *B. thetaiotaomicron*. **(B)** Metabolites with more microbial key contributors were more prone to false negative correlations. Each column represents an analyzed metabolite, ordered by its number of key microbial contributors, which are represented by each tile. The tiles are coded by the correlation outcome for each contributor. **(C)** Correlations detected key contributors equally accurately regardless of whether a metabolite is secreted, utilized, or cross-fed by the species. Each point represents the accuracy of correlations for a single metabolite across its comparisons with all 10 species.

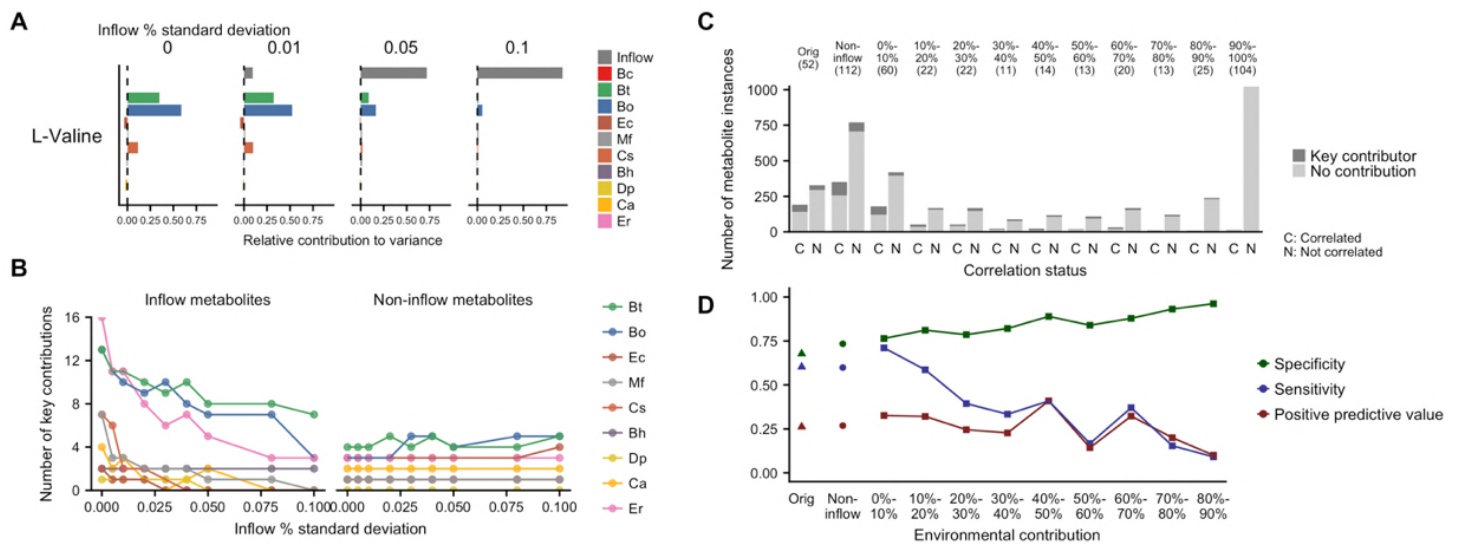

**Figure 5. Environmental fluctuations impact correlation-contributor sensitivity and specificity.** (A) Example set of contribution profiles for a single inflow metabolite, L-valine, with increasing fluctuations in its inflow. The relative contribution values for each species and for the inflow are shown for 4 sets simulation runs, each with a different degree of fluctuation. The label on each plot describes the relative standard deviation (coefficient of variation) of inflow metabolite concentrations for that set of simulations. The microbial contributions to variance in L-valine concentrations became relatively smaller with increasing variation from the external environment. (B) Shifts in key microbial contributors with increasing environmental inflow fluctuations. The number of key contributions of each species to the 52 analyzed metabolites is shown, separately for metabolites present in and absent from the nutrient inflow. Microbial contributors to inflow metabolites decreased as environmental contributions increased, but this effect varied between taxa. (C) Correlation analysis failed to detect key microbial contributors regardless of the size of contribution from external inflow variation. Across all sets of simulations, metabolites were binned based on the percent of total positive contribution from the external inflow. The bar plots shown have the same format as Figure 3A, showing the number of species-metabolites pairs that were significantly correlated (left bar) or not-correlated (right bar) and its correspondence with true species-metabolite key contributors (indicated by shade of gray). The first two bars, labeled “Orig” describe the original set of simulations (replicating Figure 3A). The next two show the results for non-inflow metabolites across all levels of inflow fluctuations. The remaining bars show the results for metabolites with increasing levels of environmental contribution. (D) Correlation analysis detected key microbial contributors with increased specificity, decreased sensitivity, and generally consistent positive predictive value with increasing contribution from the external inflow. Sensitivity, specificity, and positive predictive value are shown for same environmental contribution bins as in Panel C.

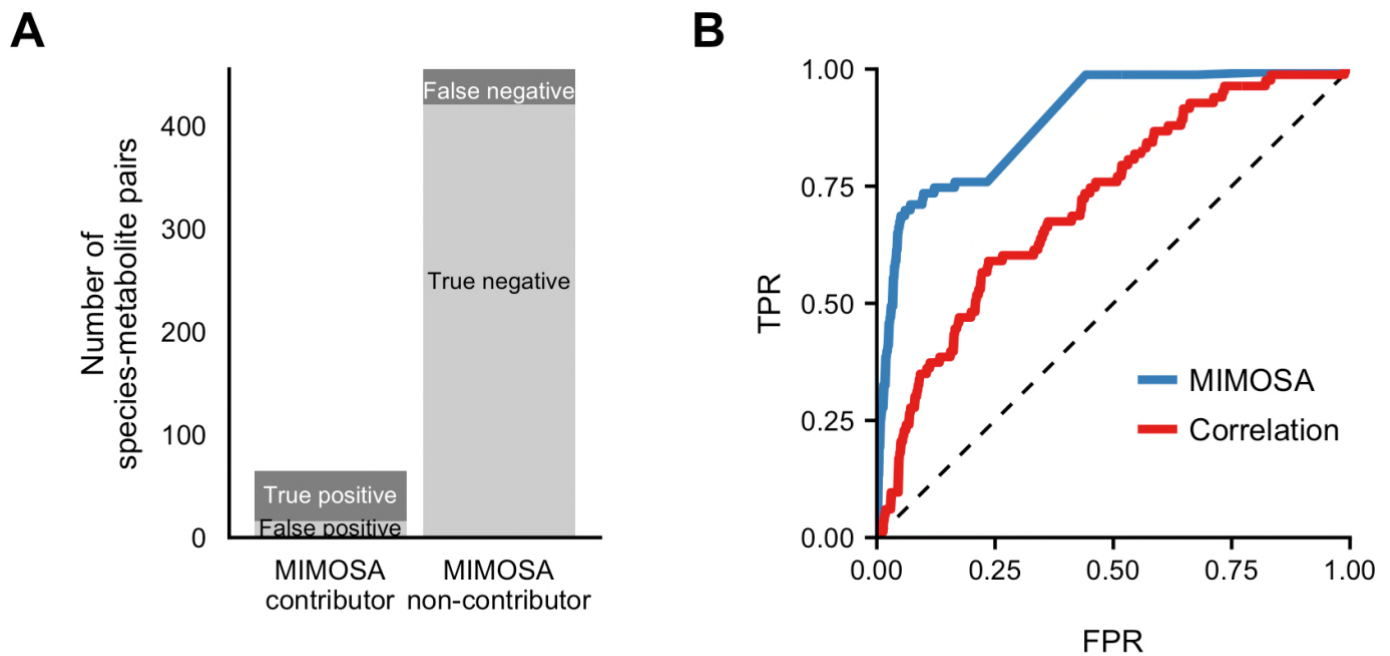

**Figure 6. MIMOSA identified key microbial contributors more accurately than correlation analysis. (A)** The number of species-metabolite pairs that were identified as potential contributors (left bar) or not (right bar) by MIMOSA, and its correspondence with true key contributors. **(B)** Receiver operating characteristic (ROC) plot, showing the ability of both MIMOSA and absolute Spearman correlation values to classify key contributors among all species-metabolite pairs.
